# Supplementary material for: General discussion of data quality challenges in social media metrics: Extensive comparison of four major altmetric data aggregators
Source: PLoS One. 2018 May 17;13(5):e0197326. doi: 10.1371/journal.pone.0197326 (PMC5957428; doi:10.1371/journal.pone.0197326)
Supplement: S4 File — (XLSX) [file pone.0197326.s004.xlsx]

## Sheet: Sheet1
doi	plum_facebook	lagotto_facebook	altmetric_facebook	plum_tweet	lagotto_tweet	altmetric_tweet	altmetric_tweeters	crossref_tweet	crossref_tweeters	plum_wikipedia	lagotto_wikipedia	crossref_wikipedia	altmetric_wikipedia	plum_Mendeley	Mendeley.com_Mendeley	lagotto_Mendeley	altmetric_Mendeley
10.1371/annotation/c81daa7c-5375-4349-970b-c63d288947eb	0	0	NULL	0	0	0	0	0	0	0	0	0	NULL	1	1	1	NULL
10.1371/annotation/e34adc2a-f73a-4055-8519-fa2deb2e852f	0	0	NULL	0	0	0	0	0	0	0	0	0	NULL	0	NULL	0	NULL
10.1371/journal.pone.003197	22	NULL	NULL	29	0	0	0	0	0	0	NULL	0	NULL	0	87	NULL	NULL
10.1371/journal.pone.0055903	0	0	NULL	0	1	0	0	0	0	0	0	0	NULL	6	6	6	NULL
10.1371/journal.pone.0075178	0	0	0	0	1	1	1	0	0	0	0	0	0	11	9	12	9
10.1371/journal.pone.0078512	1	1	0	24	9	25	23	0	0	0	0	0	0	32	34	36	33
10.1371/journal.pone.0079524	0	0	0	0	1	11	7	0	0	0	0	0	0	30	31	33	31
10.1371/journal.pone.0079987	0	0	0	0	6	7	7	0	0	0	0	0	0	41	39	43	39
10.1371/journal.pone.0081126	35	0	0	0	2	3	3	0	0	0	0	0	0	17	18	17	18
10.1371/journal.pone.0081301	0	0	0	0	0	4	3	0	0	0	0	0	0	6	6	6	6
10.1371/journal.pone.0081542	0	0	NULL	0	0	0	0	0	0	0	0	0	NULL	6	8	8	NULL
10.1371/journal.pone.0081582	0	0	0	0	0	4	4	0	0	0	0	0	0	11	11	11	11
10.1371/journal.pone.0081913	0	0	0	0	0	5	4	0	0	0	0	0	0	11	12	12	12
10.1371/journal.pone.0081941	0	0	0	0	2	3	3	0	0	0	0	0	0	18	19	19	19
10.1371/journal.pone.0082030	0	0	NULL	0	0	0	0	0	0	0	0	0	NULL	14	13	14	NULL
10.1371/journal.pone.0082087	0	0	NULL	0	0	0	0	0	0	0	0	0	NULL	8	9	10	NULL
10.1371/journal.pone.0082356	2	1	0	0	2	2	2	0	0	1	4	7	1	29	29	34	29
10.1371/journal.pone.0082450	0	0	0	0	0	1	1	0	0	0	0	0	0	18	19	19	19
10.1371/journal.pone.0082836	0	0	NULL	0	0	0	0	0	0	0	0	0	NULL	25	25	27	NULL
10.1371/journal.pone.0082880	0	0	NULL	0	0	0	0	0	0	0	0	0	NULL	31	19	20	NULL
10.1371/journal.pone.0082891	4	2	0	0	2	3	3	0	0	0	2	0	0	34	32	34	32
10.1371/journal.pone.0082926	0	0	NULL	0	0	0	0	0	0	0	0	0	NULL	5	5	6	NULL
10.1371/journal.pone.0083003	0	0	NULL	0	0	0	0	0	0	0	0	0	NULL	17	16	16	NULL
10.1371/journal.pone.0083100	0	0	0	1	1	4	4	0	0	0	0	0	0	7	8	8	8
10.1371/journal.pone.0083229	0	0	1	0	1	1	1	0	0	0	0	0	0	25	25	25	25
10.1371/journal.pone.0083240	0	0	0	5	5	4	4	0	0	0	0	0	0	19	20	21	20
10.1371/journal.pone.0083251	0	0	0	0	2	2	2	0	0	0	0	0	0	8	8	9	8
10.1371/journal.pone.0083337	0	0	0	0	0	8	7	0	0	0	0	0	0	20	19	19	19
10.1371/journal.pone.0083364	2	0	0	1	1	4	4	0	0	0	0	0	0	29	27	27	27
10.1371/journal.pone.0083387	0	0	1	0	8	17	14	0	0	0	0	0	0	27	27	27	27
10.1371/journal.pone.0083448	0	0	0	0	1	4	4	0	0	0	0	0	0	29	29	30	29
10.1371/journal.pone.0083449	1	0	1	1	11	11	9	0	0	0	0	0	0	32	39	42	39
10.1371/journal.pone.0083498	549	0	7	267	238	245	243	0	0	0	0	0	0	87	86	87	86
10.1371/journal.pone.0083512	0	0	0	1	12	13	13	0	0	0	0	0	0	22	21	22	21
10.1371/journal.pone.0083526	0	0	0	0	2	4	4	0	0	0	0	0	0	30	33	34	33
10.1371/journal.pone.0083552	0	0	0	0	1	2	2	0	0	0	0	0	0	30	28	31	28
10.1371/journal.pone.0083618	0	0	0	2	7	12	11	0	0	0	0	0	0	46	42	44	42
10.1371/journal.pone.0083670	0	0	0	1	0	2	2	0	0	0	0	0	0	4	2	2	2
10.1371/journal.pone.0083708	0	0	0	0	0	1	1	0	0	0	0	0	0	17	17	17	17
10.1371/journal.pone.0083715	0	0	0	0	2	3	2	0	0	0	0	0	0	6	6	6	6
10.1371/journal.pone.0083795	0	0	0	2	0	6	3	0	0	0	0	0	0	56	50	54	50
10.1371/journal.pone.0083844	0	0	NULL	0	0	0	0	0	0	0	0	0	NULL	29	29	30	NULL
10.1371/journal.pone.0083884	0	0	0	3	1	1	1	0	0	0	0	0	0	28	27	28	27
10.1371/.journal.pone.0093312	NULL	NULL	NULL	0	0	0	0	0	0	NULL	NULL	0	NULL	NULL	NULL	NULL	NULL
10.1371/annotation/3f0f682b-f8aa-4e9c-9d60-8aac54bb4c22	0	0	NULL	0	0	0	0	0	0	0	0	0	NULL	1	2	2	NULL
10.1371/journal.pone.0053029.g001	0	NULL	NULL	4	0	0	0	0	0	0	NULL	0	NULL	81	NULL	NULL	NULL
10.1371/journal.pone.0073402	0	0	NULL	0	0	0	0	0	0	0	0	0	NULL	13	14	14	NULL
10.1371/journal.pone.0076324	0	0	0	0	0	4	3	0	0	0	0	0	0	57	59	60	59
10.1371/journal.pone.0076429	0	0	0	0	2	2	2	0	0	0	0	0	0	27	27	28	27
10.1371/journal.pone.0076896	6	3	2	0	15	15	15	0	0	0	0	0	0	21	21	21	21
10.1371/journal.pone.0077190	0	0	0	0	1	2	2	0	0	0	0	0	0	10	5	5	5
10.1371/journal.pone.0077547	1	0	6	4	18	38	37	0	0	1	1	9	1	116	126	136	126
10.1371/journal.pone.0078566	8	0	0	2	1	5	4	0	0	0	0	0	0	17	17	17	17
10.1371/journal.pone.0079079	0	0	0	1	0	1	1	0	0	0	0	0	0	9	9	9	9
10.1371/journal.pone.0079802	2	1	1	0	1	24	22	0	0	0	0	0	0	54	54	55	54
10.1371/journal.pone.0080160	0	0	0	0	7	1	1	0	0	0	0	0	0	14	14	14	14
10.1371/journal.pone.0080199	0	0	2	0	1	0	0	0	0	0	0	0	0	33	37	34	37
10.1371/journal.pone.0080989	0	0	0	0	0	1	1	0	0	0	0	0	0	13	13	14	13
10.1371/journal.pone.0081186	0	0	0	1	0	1	1	0	0	1	1	9	1	20	19	20	19
10.1371/journal.pone.0081832	0	0	2	0	5	6	4	0	0	0	0	0	0	34	34	34	34
10.1371/journal.pone.0081896	0	0	NULL	0	0	0	0	0	0	0	0	0	NULL	27	31	31	NULL
10.1371/journal.pone.0081920	76	38	3	0	0	0	0	0	0	0	0	0	0	76	73	82	73
10.1371/journal.pone.0081981	0	0	0	3	0	3	2	0	0	0	0	0	0	40	39	44	39
10.1371/journal.pone.0082342	0	0	NULL	0	0	0	0	0	0	0	0	0	NULL	11	11	11	NULL
10.1371/journal.pone.0082694	2	0	0	0	3	7	4	0	0	0	0	0	0	25	23	24	23
10.1371/annotation/a8a589bb-a91d-4834-80d2-47d1acd2e7cc	0	NULL	NULL	0	0	0	0	0	0	0	NULL	0	NULL	0	NULL	NULL	NULL
10.1371/journal.pone.0062079	0	0	NULL	0	0	0	0	0	0	0	0	0	NULL	4	4	4	NULL
10.1371/journal.pone.0071695	0	0	0	4	0	4	4	0	0	0	0	0	0	5	5	5	5
10.1371/journal.pone.0072723	0	0	0	0	3	3	3	0	0	0	0	0	0	18	29	34	29
10.1371/journal.pone.0076458	0	0	0	2	1	5	5	0	0	0	0	0	0	26	26	27	26
10.1371/journal.pone.0077810	0	0	0	0	0	1	1	0	0	0	0	0	0	21	21	22	21
10.1371/journal.pone.0079055	0	0	0	0	0	1	1	0	0	0	0	0	0	36	36	43	36
10.1371/journal.pone.0079616	0	0	0	0	5	5	5	0	0	0	0	0	0	65	59	58	59
10.1371/journal.pone.0079795	0	0	NULL	0	0	0	0	0	0	0	2	0	NULL	24	22	22	NULL
10.1371/journal.pone.0079902	6	3	0	0	5	6	6	0	0	0	0	0	0	25	28	28	28
10.1371/journal.pone.0080050	0	0	0	1	0	1	1	0	0	0	0	0	0	23	24	25	24
10.1371/journal.pone.0080227	0	0	0	1	0	1	1	0	0	0	0	0	0	14	11	12	12
10.1371/journal.pone.0080255	0	0	NULL	0	0	0	0	0	0	0	0	0	NULL	14	13	13	NULL
10.1371/journal.pone.0080488	32	13	2	7	10	28	24	0	0	0	0	0	0	16	14	15	14
10.1371/journal.pone.0080664	0	0	0	0	0	1	1	0	0	0	0	0	0	26	24	24	24
10.1371/journal.pone.0081229	0	0	1	0	16	20	20	0	0	0	0	0	0	36	34	43	34
10.1371/journal.pone.0081293	0	0	0	0	2	3	3	0	0	0	0	0	0	7	7	7	7
10.1371/journal.pone.0081386	0	0	2	0	15	14	13	0	0	2	5	10	2	26	27	28	27
10.1371/journal.pone.0081424	0	0	NULL	0	0	0	0	0	0	0	0	0	NULL	9	10	11	NULL
10.1371/journal.pone.0081535	0	0	0	0	0	1	1	0	0	0	0	0	0	3	3	3	3
10.1371/journal.pone.0082179	6	0	0	0	1	1	1	0	0	0	0	0	0	31	32	33	32
10.1371/journal.pone.0082185	0	0	NULL	0	0	0	0	0	0	0	0	0	NULL	23	25	25	NULL
10.1371/annotation/08286cd8-527f-4f14-856f-57267107efa8	0	NULL	NULL	0	0	0	0	0	0	0	NULL	0	NULL	1	NULL	NULL	NULL
10.1371/annotation/11698dd2-0bc1-4fe0-ad92-b161b5594e81	0	0	NULL	0	0	0	0	0	0	0	0	0	NULL	0	NULL	0	NULL
10.1371/journal.pone.0071290	2	0	1	0	0	0	0	0	0	0	0	0	0	3	3	3	3
10.1371/journal.pone.0071862	0	0	NULL	0	0	0	0	0	0	0	0	0	NULL	3	3	3	NULL
10.1371/journal.pone.0074132	0	0	0	0	9	10	6	0	0	0	0	0	0	35	34	35	34
10.1371/journal.pone.0075578.g002	0	NULL	NULL	0	0	0	0	0	0	0	NULL	0	NULL	16	NULL	NULL	NULL
10.1371/journal.pone.0077669	0	0	0	0	2	4	3	0	0	0	0	0	0	43	42	45	42
10.1371/journal.pone.0078438	0	0	0	0	0	1	1	0	0	0	0	0	0	31	29	29	29
10.1371/journal.pone.0078494	0	0	NULL	0	0	0	0	0	0	0	0	0	NULL	15	15	15	NULL
10.1371/journal.pone.0078644	0	0	3	3	4	8	7	0	0	0	1	24	1	584	617	633	617
10.1371/journal.pone.0078995	0	0	0	0	0	5	4	0	0	0	0	0	0	17	17	18	17
10.1371/journal.pone.0079784	0	0	0	0	11	22	19	0	0	0	0	0	0	50	50	56	50
10.1371/journal.pone.0080445	0	0	0	0	0	7	5	0	0	0	0	0	0	10	10	11	10
10.1371/journal.pone.0081237	1077	92	6	334	200	312	294	0	0	0	0	0	0	103	104	102	104
10.1371/journal.pone.0081248	20	10	1	2	30	32	24	0	0	0	0	0	0	78	76	79	76
10.1371/journal.pone.0081454	0	0	0	0	0	1	1	0	0	0	0	0	0	24	23	24	23
10.1371/journal.pone.0081636	22	0	0	0	0	1	1	0	0	0	0	0	0	15	13	13	13
10.1371/journal.pone.0081850	2	0	0	4	2	4	3	0	0	0	0	0	0	23	23	25	23
10.1371/journal.pone.0082371	0	0	0	3	21	25	23	0	0	0	0	0	0	56	56	58	56
10.1371/journal.pone.0082499	1	0	0	0	0	1	1	0	0	0	0	0	0	21	22	24	22
10.1371/journal.pone.0082511	0	0	NULL	0	0	0	0	0	0	0	0	0	NULL	35	33	34	NULL
10.1371/journal.pone.0082707	0	0	0	0	0	1	1	0	0	0	0	0	0	29	29	30	29
10.1371/journal.pone.0083923	0	0	NULL	0	0	0	0	0	0	0	0	0	NULL	18	18	18	NULL
10.1371/journal.pone.0083932	0	0	0	0	2	2	2	0	0	0	0	0	0	12	13	14	13
10.1371/journal.pone.0083949	0	0	0	0	9	5	5	0	0	0	0	0	0	19	21	22	21
10.1371/journal.pone.0084015	0	0	0	0	1	1	1	0	0	0	0	0	0	11	13	13	13
10.1371/journal.pone.0084021	0	0	NULL	0	0	0	0	0	0	0	3	0	NULL	13	14	14	NULL
10.1371/journal.pone.0084025	0	0	0	0	6	8	8	0	0	0	0	0	0	17	17	17	17
10.1371/journal.pone.0084052	0	0	0	1	1	1	1	0	0	0	0	0	0	9	10	12	10
10.1371/journal.pone.0084080	0	0	0	0	1	1	1	0	0	0	0	0	0	29	28	29	28
10.1371/journal.pone.0084103	0	0	0	0	4	3	3	0	0	0	0	0	0	12	13	14	13
10.1371/journal.pone.0084111	0	0	NULL	0	0	0	0	0	0	0	0	0	NULL	15	13	14	NULL
10.1371/journal.pone.0084117	0	0	1	6	12	17	16	0	0	0	0	0	0	63	63	66	63
10.1371/journal.pone.0084118	148	0	0	9	17	20	19	0	0	0	0	0	0	99	76	84	76
10.1371/journal.pone.0084119	0	0	NULL	0	0	0	0	0	0	0	0	0	NULL	14	15	15	NULL
10.1371/journal.pone.0084122	0	0	NULL	0	0	0	0	0	0	0	0	0	NULL	9	9	9	NULL
10.1371/journal.pone.0084129	0	0	1	1	0	2	1	0	0	0	0	0	0	4	4	4	4
10.1371/journal.pone.0084131	0	0	0	0	4	5	5	0	0	0	0	0	0	41	38	40	38
10.1371/journal.pone.0084146	0	0	NULL	0	0	0	0	0	0	0	0	0	NULL	20	20	21	NULL
10.1371/journal.pone.0084215	0	0	0	0	2	9	6	0	0	0	0	0	0	28	32	34	31
10.1371/journal.pone.0084288	0	0	0	1	10	10	10	0	0	0	0	0	0	33	34	36	34
10.1371/journal.pone.0084291	0	0	NULL	0	0	0	0	0	0	0	0	0	NULL	60	60	61	NULL
10.1371/journal.pone.0084338	0	0	0	3	0	2	2	0	0	0	0	0	0	53	49	52	49
10.1371/journal.pone.0084367	0	0	NULL	0	0	0	0	0	0	0	0	0	NULL	26	27	32	NULL
10.1371/journal.pone.0082873	0	0	0	6	4	10	10	0	0	0	0	0	0	54	54	57	54
10.1371/journal.pone.0083254	2	1	0	0	7	10	8	0	0	0	0	0	0	9	10	9	10
10.1371/journal.pone.0083256	222	4	2	20	1	29	27	0	0	0	0	0	0	159	160	169	160
10.1371/journal.pone.0083331	4	2	3	5	2	6	6	0	0	0	0	0	0	94	96	99	96
10.1371/journal.pone.0083391	0	0	0	3	19	24	12	0	0	0	0	0	0	13	12	12	12
10.1371/journal.pone.0083437	0	0	0	4	0	5	5	0	0	0	0	0	0	10	9	9	9
10.1371/journal.pone.0083546	0	0	NULL	0	0	0	0	0	0	0	0	0	NULL	30	32	31	NULL
10.1371/journal.pone.0083585	0	0	0	0	0	1	1	0	0	0	0	0	0	11	14	14	14
10.1371/journal.pone.0083594.g002	0	NULL	NULL	1	0	0	0	0	0	0	NULL	0	NULL	95	NULL	NULL	NULL
10.1371/journal.pone.0083648	14	7	5	1	5	6	6	0	0	0	0	0	0	109	113	115	113
10.1371/journal.pone.0083683	0	0	NULL	0	0	0	0	0	0	0	0	0	NULL	21	21	21	NULL
10.1371/journal.pone.0083705	0	0	0	0	18	19	15	0	0	0	0	0	0	14	13	15	13
10.1371/journal.pone.0083736	12	12	0	0	2	2	2	0	0	0	0	0	0	59	58	63	58
10.1371/journal.pone.0083758	0	0	0	0	0	1	1	0	0	0	0	0	0	12	13	14	13
10.1371/journal.pone.0083766	0	0	NULL	0	0	0	0	0	0	0	0	0	NULL	5	6	6	NULL
10.1371/journal.pone.0083786	0	0	0	0	0	2	2	0	0	0	0	0	0	10	11	13	11
10.1371/journal.pone.0083865	0	0	1	3	0	5	4	0	0	0	0	0	0	85	84	88	84
10.1371/journal.pone.0083867	122	44	6	9	93	107	100	2	1	0	0	0	0	83	78	80	78
10.1371/journal.pone.0083871	0	0	NULL	0	0	0	0	0	0	0	0	0	NULL	5	5	6	NULL
10.1371/journal.pone.0083879	0	0	0	23	25	29	7	14	1	0	0	0	0	53	59	61	59
10.1371/journal.pone.0083893	28	12	4	71	53	78	47	0	0	0	0	0	0	39	45	45	45
10.1371/journal.pone.0083895	0	0	0	0	0	2	2	0	0	0	0	0	0	10	9	10	9
10.1371/annotation/f016476b-5b84-4c9a-899f-fe8b8bc927b5	0	NULL	NULL	0	0	0	0	0	0	0	NULL	0	NULL	0	NULL	NULL	NULL
10.1371/journal.one.0106772	0	NULL	NULL	0	0	0	0	0	0	0	NULL	0	NULL	0	NULL	NULL	NULL
10.1371/journal.pone.0079266	0	0	0	0	9	13	12	0	0	0	0	0	0	40	34	38	34
10.1371/journal.pone.0080014	0	0	0	0	0	1	1	0	0	0	0	0	0	6	6	6	6
10.1371/journal.pone.0080018	0	0	0	0	0	1	1	0	0	0	0	0	0	9	9	10	9
10.1371/journal.pone.0080398	0	0	0	0	6	6	6	0	0	0	0	0	0	26	22	25	22
10.1371/journal.pone.0080641	0	0	NULL	0	0	0	0	0	0	0	0	0	NULL	58	59	59	NULL
10.1371/journal.pone.0081123	0	0	0	0	0	1	1	0	0	0	0	0	0	22	21	23	21
10.1371/journal.pone.0081817	0	0	0	0	0	1	1	0	0	0	0	0	0	7	6	6	6
10.1371/journal.pone.0081843	0	0	NULL	0	0	0	0	0	0	0	0	0	NULL	29	28	29	NULL
10.1371/journal.pone.0081998	0	0	0	0	1	1	1	0	0	0	0	0	0	18	15	14	15
10.1371/journal.pone.0082119	0	0	0	0	3	3	3	0	0	0	0	0	0	13	16	16	16
10.1371/journal.pone.0082235	4	0	0	0	4	10	8	0	0	0	0	0	0	26	32	32	32
10.1371/journal.pone.0082303	0	0	0	1	2	5	5	0	0	0	0	0	0	37	39	39	39
10.1371/journal.pone.0082416	0	0	0	0	2	3	3	0	0	0	0	0	0	25	23	26	23
10.1371/journal.pone.0082622	0	0	0	1	2	3	3	0	0	0	0	0	0	22	27	28	27
10.1371/journal.pone.0082640	0	0	NULL	0	0	0	0	0	0	0	0	0	NULL	9	10	12	NULL
10.1371/journal.pone.0083053	0	0	0	0	4	2	2	0	0	0	0	0	0	17	19	19	19
10.1371/journal.pone.0083082	0	0	0	0	2	3	3	0	0	0	0	0	0	13	11	11	11
10.1371/journal.pone.0083106	0	0	0	1	0	1	1	0	0	0	0	0	0	23	22	23	22
10.1371/journal.pone.0083113	0	0	0	0	3	3	3	0	0	0	0	0	0	15	18	21	18
10.1371/journal.pone.0083147	18	9	1	6	107	108	99	0	0	1	1	15	1	41	39	38	39
10.1371/journal.pone.0082642	0	0	NULL	0	0	0	0	0	0	0	0	0	NULL	8	7	8	NULL
10.1371/journal.pone.0082681	0	0	0	0	0	2	2	0	0	0	0	0	0	26	24	25	24
10.1371/journal.pone.0082716	0	0	NULL	0	0	0	0	0	0	0	0	0	NULL	11	10	12	NULL
10.1371/journal.pone.0082852	0	0	NULL	0	0	0	0	0	0	0	0	0	NULL	9	9	9	NULL
10.1371/journal.pone.0083104	0	0	NULL	0	0	0	0	0	0	0	0	0	NULL	13	13	14	NULL
10.1371/journal.pone.0083144	0	0	0	1	11	16	10	0	0	0	0	0	0	74	45	47	46
10.1371/journal.pone.0083159	0	0	NULL	0	0	0	0	0	0	0	0	0	NULL	21	21	21	NULL
10.1371/journal.pone.0083259	21492	36	9	237	252	250	226	0	0	6	43	49	16	176	175	179	175
10.1371/journal.pone.0083267	0	0	0	0	3	4	4	0	0	0	0	0	0	24	24	24	24
10.1371/journal.pone.0083284	0	0	0	0	10	11	10	0	0	0	0	0	0	76	73	75	73
10.1371/journal.pone.0083315	0	0	NULL	0	0	0	0	0	0	0	0	0	NULL	16	17	20	NULL
10.1371/journal.pone.0083338	0	0	2	1	9	11	10	0	0	0	1	1	0	48	45	46	45
10.1371/journal.pone.0083363	0	0	NULL	0	0	0	0	0	0	0	0	0	NULL	52	50	55	NULL
10.1371/journal.pone.0083376	0	0	0	0	1	2	2	0	0	0	0	0	0	17	16	17	16
10.1371/journal.pone.0083385	0	0	NULL	0	0	0	0	0	0	0	0	0	NULL	4	4	4	NULL
10.1371/journal.pone.0083417	0	0	1	0	1	3	3	0	0	0	0	0	0	17	17	18	17
10.1371/journal.pone.0083582	0	0	0	0	1	2	2	0	0	0	0	0	0	6	7	7	7
10.1371/journal.pone.0083597	0	0	NULL	0	0	0	0	0	0	0	0	0	NULL	23	24	24	NULL
10.1371/journal.pone.0083599	0	0	0	0	0	1	1	0	0	0	0	0	0	30	28	29	28
10.1371/journal.pone.0083612	0	0	0	0	0	1	1	0	0	0	0	0	0	12	12	12	12
10.1371/journal.pone.0083623	2404	16	112	314	245	324	299	0	0	8	42	161	11	265	262	266	262
10.1371/journal.pone.0083707	0	0	0	0	1	1	1	0	0	0	0	0	0	30	30	31	30
10.1371/journal.pone.0083924	0	0	NULL	0	0	0	0	0	0	0	0	0	NULL	9	9	8	NULL
10.1371/journal.pone.0083926	0	0	0	0	0	0	0	0	0	1	1	77	1	33	30	31	30
10.1371/journal.pone.0083929	0	0	0	0	3	3	3	0	0	0	0	0	0	60	57	60	57
10.1371/journal.pone.0083962	2	1	NULL	0	0	0	0	0	0	0	0	0	NULL	47	45	45	NULL
10.1371/journal.pone.0083979	0	0	NULL	0	0	0	0	0	0	0	0	0	NULL	46	49	52	NULL
10.1371/journal.pone.0084000	2	0	NULL	0	0	0	0	0	0	0	0	0	NULL	30	31	31	NULL
10.1371/journal.pone.0084037	0	0	1	0	2	3	3	0	0	0	0	0	0	21	20	20	20
10.1371/journal.pone.0084087	2	1	NULL	0	0	0	0	0	0	0	0	0	NULL	18	20	21	NULL
10.1371/journal.pone.0084128	0	0	0	0	11	12	9	0	0	0	0	0	0	7	4	4	4
10.1371/journal.pone.0084209	0	0	0	0	0	0	0	0	0	0	0	0	0	70	68	71	68
10.1371/journal.pone.0084227	0	0	0	0	1	2	2	0	0	0	0	0	0	19	18	19	18
10.1371/journal.pone.0084239	0	0	NULL	0	0	0	0	0	0	0	0	0	NULL	15	15	18	NULL
10.1371/journal.pone.0084240	0	0	0	0	0	1	1	0	0	0	0	0	0	15	14	15	14
10.1371/journal.pone.0084271	0	0	0	0	1	5	4	0	0	0	0	0	0	13	17	15	16
10.1371/journal.pone.0084287	0	0	NULL	0	0	0	0	0	0	0	0	0	NULL	22	20	22	NULL
10.1371/journal.pone.0084342	5	0	1	9	19	28	20	0	0	0	0	0	0	41	40	45	40
10.1371/journal.pone.0084343	0	0	NULL	0	0	0	0	0	0	0	0	0	NULL	13	13	14	NULL
10.1371/journal.pone.0084380	1	0	0	1	0	1	1	0	0	0	0	0	0	10	9	9	9
10.1371/journal.pone.0084388	0	0	0	1	1	1	1	0	0	0	0	0	0	10	9	9	9
10.1371/journal.pone.0084389	0	0	0	0	0	1	1	0	0	0	0	0	0	9	9	9	9
10.1371/journal.pone.0084414	0	0	NULL	0	0	0	0	0	0	0	0	0	NULL	6	4	4	NULL
10.1371/journal.pone.0084449	0	0	0	2	2	6	4	0	0	0	0	0	0	22	22	24	22
10.1371/journal.pone.0082911	0	0	0	0	1	7	5	0	0	0	0	0	0	23	29	31	28
10.1371/journal.pone.0083063	0	0	NULL	0	0	0	0	0	0	0	0	0	NULL	10	10	11	NULL
10.1371/journal.pone.0083153	0	0	NULL	0	0	0	0	0	0	0	0	0	NULL	5	5	5	NULL
10.1371/journal.pone.0083217	0	0	NULL	0	0	0	0	0	0	0	0	0	NULL	22	25	26	NULL
10.1371/journal.pone.0083265	0	0	0	0	0	1	1	0	0	0	0	0	0	5	6	5	6
10.1371/journal.pone.0083320	4	2	0	0	1	1	1	0	0	0	0	0	0	4	4	4	4
10.1371/journal.pone.0083388	2	2	1	0	4	11	8	0	0	0	0	0	0	15	16	17	16
10.1371/journal.pone.0083428	0	0	0	0	6	6	5	0	0	0	0	0	0	37	37	38	37
10.1371/journal.pone.0083459	0	0	0	0	1	4	4	0	0	0	0	0	0	79	81	82	81
10.1371/journal.pone.0083500	42	20	13	33	167	206	185	0	0	3	6	37	2	131	130	142	130
10.1371/journal.pone.0083515	0	0	0	3	13	16	15	2	2	0	0	0	0	59	59	58	59
10.1371/journal.pone.0083541	0	0	NULL	0	0	0	0	0	0	0	0	0	NULL	19	20	20	NULL
10.1371/journal.pone.0083557	0	0	NULL	0	0	0	0	0	0	0	0	0	NULL	4	3	3	NULL
10.1371/journal.pone.0083646	0	0	0	0	4	5	5	0	0	0	0	0	0	20	18	19	18
10.1371/journal.pone.0083685	2	0	0	1	1	5	5	0	0	0	0	0	0	25	25	25	25
10.1371/journal.pone.0083747	0	0	0	0	1	2	2	0	0	0	0	0	0	5	5	7	5
10.1371/journal.pone.0083757	4	4	0	0	8	9	9	0	0	0	0	0	0	17	16	16	16
10.1371/journal.pone.0083779	0	0	0	0	9	13	13	0	0	0	0	0	0	64	64	64	64
10.1371/journal.pone.0083808	0	0	0	1	1	2	2	0	0	0	0	0	0	24	26	29	26
10.1371/journal.pone.0083817	0	0	0	4	3	5	2	0	0	0	0	0	0	5	5	5	5
10.1371/journal.pone.0083818	0	0	0	0	0	1	1	0	0	0	0	0	0	23	21	21	21
10.1371/journal.pone.0083897	0	0	0	0	1	1	1	0	0	0	0	0	0	36	46	53	46
10.1371/journal.pone.0084391	0	0	0	1	3	5	4	0	0	0	0	0	0	30	32	34	32
10.1371/journal.pone.0084394	0	0	NULL	0	0	0	0	0	0	0	0	0	NULL	29	31	31	NULL
10.1371/journal.pone.0084395	0	0	0	0	1	1	1	0	0	0	0	0	0	12	12	12	12
10.1371/journal.pone.0084434	0	0	0	1	0	3	3	0	0	0	0	0	0	11	11	12	11
10.1371/journal.pone.0084490	0	0	3	0	24	23	23	0	0	0	0	0	0	39	34	34	34
10.1371/journal.pone.0084552	0	0	NULL	0	0	0	0	0	0	0	0	0	NULL	33	28	30	NULL
10.1371/journal.pone.0084554	2	0	0	1	3	7	7	0	0	0	0	0	0	49	51	54	51
10.1371/journal.pone.0084555	1	0	NULL	0	0	0	0	0	0	0	0	0	NULL	42	36	38	NULL
10.1371/journal.pone.0084558	0	0	0	2	1	3	3	0	0	0	0	0	0	15	14	14	14
10.1371/journal.pone.0084564	2	0	2	1	0	2	2	0	0	0	0	0	0	34	17	17	17
10.1371/journal.pone.0084570	0	0	0	0	0	0	0	0	0	0	0	0	0	23	23	24	23
10.1371/journal.pone.0084578	68	31	0	2	4	7	7	0	0	0	0	0	0	58	57	59	57
10.1371/journal.pone.0084597	10	5	NULL	0	0	0	0	0	0	0	0	0	NULL	25	29	30	NULL
10.1371/journal.pone.0084605	0	0	0	0	2	5	5	0	0	0	0	0	0	47	35	37	35
10.1371/journal.pone.0084616	0	0	NULL	0	0	0	0	0	0	0	0	0	NULL	27	31	31	NULL
10.1371/journal.pone.0084626	0	0	NULL	0	0	0	0	0	0	0	0	0	NULL	55	63	66	NULL
10.1371/journal.pone.0084633	0	0	1	3	2	6	6	0	0	0	0	0	0	15	11	11	11
10.1371/journal.pone.0084654	0	0	0	0	0	0	0	0	0	1	3	5	3	27	29	30	29
10.1371/journal.pone.0084680	0	0	0	1	0	1	1	0	0	0	0	0	0	17	17	18	16
10.1371/journal.pone.0084683	0	0	0	0	3	2	2	0	0	0	0	0	0	18	22	20	22
10.1371/journal.pone.0084687	0	0	0	4	5	4	4	0	0	0	0	0	0	37	34	35	34
10.1371/journal.pone.0084699	1	0	NULL	0	0	0	0	0	0	0	0	0	NULL	19	1	1	NULL
10.1371/annotation/1dc8bed5-aef7-4251-a23d-bded0b0ee9a4	0	0	NULL	0	0	0	0	0	0	0	0	0	NULL	0	NULL	0	NULL
10.1371/annotation/f1b2fa68-726c-4f30-b061-d05c8a281eb8	0	0	NULL	0	0	0	0	0	0	0	0	0	NULL	1	1	1	NULL
10.1371/journal.one.0088884	NULL	NULL	NULL	0	0	0	0	0	0	NULL	NULL	0	NULL	NULL	NULL	NULL	NULL
10.1371/journal.pone.0063581.g001	0	NULL	NULL	0	0	0	0	0	0	0	NULL	0	NULL	3	NULL	NULL	NULL
10.1371/journal.pone.0070639	0	0	1	0	6	7	7	0	0	0	0	0	0	6	7	8	7
10.1371/journal.pone.0071511	1	0	0	0	0	5	4	0	0	0	0	0	0	25	25	26	25
10.1371/journal.pone.0075396	0	0	0	0	2	2	2	0	0	0	0	0	0	33	34	34	34
10.1371/journal.pone.0075734	0	0	0	1	1	5	5	0	0	0	0	0	0	22	24	23	24
10.1371/journal.pone.0078349	0	0	0	0	0	1	1	0	0	0	0	0	0	10	10	10	10
10.1371/journal.pone.0078546	0	0	NULL	0	0	0	0	0	0	0	0	0	NULL	15	15	15	NULL
10.1371/journal.pone.0078583	0	0	0	0	0	4	4	0	0	0	0	0	0	19	17	21	17
10.1371/journal.pone.0079991	0	0	0	0	1	1	1	0	0	0	0	0	0	43	47	51	47
10.1371/journal.pone.0080836	0	0	0	0	0	1	1	0	0	0	0	0	0	9	12	13	12
10.1371/journal.pone.0081255	0	0	0	1	1	2	2	0	0	0	0	0	0	42	39	40	39
10.1371/journal.pone.0081447	0	0	0	3	10	6	1	0	0	0	0	0	0	19	19	19	19
10.1371/journal.pone.0081510	0	0	3	0	8	14	13	0	0	0	0	0	0	31	26	27	26
10.1371/journal.pone.0081699	0	0	NULL	0	0	0	0	0	0	0	0	0	NULL	20	21	21	NULL
10.1371/journal.pone.0081819	0	0	0	2	1	3	3	0	0	0	0	0	0	7	10	10	10
10.1371/journal.pone.0082222	4	2	0	0	7	7	7	0	0	0	0	0	0	49	51	59	51
10.1371/journal.pone.0082297	0	0	0	2	3	8	8	0	0	0	0	0	0	27	28	33	28
10.1371/journal.pone.0082331	2	0	0	1	2	3	3	0	0	0	0	0	0	69	70	78	70
10.1371/journal.pone.0082393	0	0	NULL	0	0	0	0	0	0	0	0	0	NULL	33	32	37	NULL
10.1371/journal.pone.0083224	0	0	1	1	5	6	6	0	0	0	0	0	0	38	32	36	32
10.1371/journal.pone.0083302	0	0	0	1	15	13	10	0	0	0	0	0	0	18	18	18	18
10.1371/journal.pone.0083369	0	0	0	0	0	1	1	0	0	0	0	0	0	29	30	32	30
10.1371/journal.pone.0083400	0	0	0	13	4	19	14	0	0	0	0	0	0	31	33	37	33
10.1371/journal.pone.0083477	0	0	NULL	0	0	0	0	0	0	0	0	0	NULL	11	10	10	NULL
10.1371/journal.pone.0083501	0	0	NULL	0	0	0	0	0	0	0	0	0	NULL	4	4	4	NULL
10.1371/journal.pone.0083503	2	0	0	14	2	17	15	0	0	0	0	0	0	13	14	16	14
10.1371/journal.pone.0083556	10	2	0	1	2	2	2	0	0	1	1	11	1	59	62	63	62
10.1371/journal.pone.0083590	0	0	0	0	1	6	6	0	0	0	0	0	0	18	18	21	18
10.1371/journal.pone.0083642	0	0	0	0	3	23	7	0	0	0	0	0	0	36	36	37	36
10.1371/journal.pone.0083652	2	1	0	0	0	1	1	0	0	0	0	0	0	25	23	23	26
10.1371/journal.pone.0083658	0	0	0	0	0	2	2	0	0	0	0	0	0	13	13	13	13
10.1371/journal.pone.0083664	0	0	0	0	0	1	1	0	0	0	0	0	0	3	15	15	15
10.1371/journal.pone.0083686	0	0	NULL	0	0	0	0	0	0	0	0	0	NULL	8	8	9	NULL
10.1371/journal.pone.0083704	0	0	0	0	1	1	1	0	0	0	0	0	0	23	24	25	24
10.1371/journal.pone.0083848	0	0	NULL	0	0	0	0	0	0	0	0	0	NULL	4	4	4	NULL
10.1371/journal.pone.0083873	0	0	7	1	30	30	28	0	0	0	1	0	0	127	125	133	125
10.1371/journal.pone.0083894	0	0	NULL	0	0	0	0	0	0	0	0	0	NULL	18	18	19	NULL
10.1371/journal.pone.0083902	0	0	0	0	1	1	1	0	0	0	0	0	0	22	23	23	23
10.1371/journal.pone.0083908	0	0	0	0	0	1	1	0	0	0	0	0	0	13	15	13	15
10.1371/journal.pone.0083944	4	3	1	0	0	0	0	0	0	0	0	0	0	31	32	32	32
10.1371/journal.pone.0083955	0	0	0	1	0	1	1	0	0	0	0	0	0	9	15	16	15
10.1371/journal.pone.0083740	0	0	0	0	5	4	3	0	0	2	3	12	2	10	10	10	10
10.1371/journal.pone.0083744	28	5	5	8	12	35	29	1	1	1	2	2	1	120	123	130	123
10.1371/journal.pone.0083819	0	0	NULL	0	0	0	0	0	0	0	0	0	NULL	17	16	16	NULL
10.1371/journal.pone.0083828	0	0	NULL	0	0	0	0	0	0	0	0	0	NULL	21	20	26	NULL
10.1371/journal.pone.0083838	0	0	NULL	0	0	0	0	0	0	0	4	0	NULL	8	8	9	NULL
10.1371/journal.pone.0083851	0	0	NULL	0	0	0	0	0	0	0	0	0	NULL	4	4	4	NULL
10.1371/journal.pone.0083860	0	0	NULL	0	0	0	0	0	0	0	0	0	NULL	10	10	11	NULL
10.1371/journal.pone.0083874	0	0	0	0	1	7	5	0	0	0	0	0	0	21	21	21	21
10.1371/journal.pone.0083876	0	0	0	0	0	1	1	0	0	0	0	0	0	20	20	21	20
10.1371/journal.pone.0083900	0	0	NULL	0	0	0	0	0	0	0	0	0	NULL	7	6	6	NULL
10.1371/journal.pone.0083915	2	0	0	8	11	21	20	0	0	0	0	0	0	53	56	51	56
10.1371/journal.pone.0084092	0	0	0	0	0	1	1	0	0	0	0	0	0	13	14	15	14
10.1371/journal.pone.0084104	0	0	0	11	3	14	13	0	0	0	0	0	0	29	30	29	30
10.1371/journal.pone.0084184	0	0	0	0	8	9	9	0	0	0	0	0	0	31	31	32	30
10.1371/journal.pone.0084197	0	0	0	23	17	23	20	0	0	0	0	0	0	51	54	55	54
10.1371/journal.pone.0084251	0	0	0	1	0	1	1	0	0	1	1	0	1	10	9	11	9
10.1371/journal.pone.0084299	12	6	0	0	5	4	4	0	0	0	3	0	0	70	69	70	69
10.1371/journal.pone.0084311	0	0	0	0	1	2	2	0	0	0	0	0	0	17	17	17	17
10.1371/journal.pone.0084326	0	0	0	0	0	1	1	0	0	0	0	0	0	15	15	19	15
10.1371/journal.pone.0084374	0	0	0	0	1	1	1	0	0	0	0	0	0	8	5	5	5
10.1371/journal.pone.0084385	0	0	1	0	2	2	2	0	0	0	0	0	0	20	20	21	20
10.1371/journal.pone.0084387	0	0	0	0	0	1	1	0	0	0	0	0	0	8	8	8	8
10.1371/journal.pone.0084483	0	0	NULL	0	0	0	0	0	0	0	0	0	NULL	16	19	19	NULL
10.1371/journal.pone.0084498	0	0	NULL	0	0	0	0	0	0	0	0	0	NULL	17	18	19	NULL
10.1371/journal.pone.0084503	0	0	0	0	1	1	1	0	0	0	0	0	0	11	11	11	11
10.1371/journal.pone.0084513	0	0	1	0	3	3	3	0	0	0	0	0	0	48	50	51	50
10.1371/journal.pone.0084524	0	0	NULL	0	0	0	0	0	0	0	2	0	NULL	23	24	24	NULL
10.1371/journal.pone.0084533	0	0	NULL	0	0	0	0	0	0	0	0	0	NULL	4	4	4	NULL
10.1371/journal.pone.0084541	0	0	0	0	2	3	3	0	0	0	0	0	0	5	5	5	5
10.1371/journal.pone.0084544	0	0	0	0	1	3	3	0	0	0	0	0	0	29	29	29	29
10.1371/journal.pone.0084562	0	0	NULL	0	0	0	0	0	0	0	0	0	NULL	25	20	20	NULL
10.1371/journal.pone.0084599	0	0	NULL	0	0	0	0	0	0	0	0	0	NULL	4	4	3	NULL
10.1371/journal.pone.0084656	0	0	0	0	11	12	9	0	0	0	2	0	0	49	49	51	49
10.1371/journal.pone.0084667	82	39	1	2	7	8	8	0	0	0	0	0	0	15	15	15	15
10.1371/journal.pone.0084674	2	0	0	2	13	16	14	0	0	1	2	8	1	59	58	65	58
10.1371/journal.pone.0084675	0	0	NULL	0	0	0	0	0	0	0	0	0	NULL	9	12	13	NULL
10.1371/journal.pone.0084676	0	0	0	0	0	1	1	0	0	0	0	0	0	9	10	23	19
10.1371/journal.pone.0084679	2	1	0	0	1	5	5	0	0	0	1	0	0	60	45	45	45
10.1371/journal.pone.0084682	0	0	NULL	0	0	0	0	0	0	0	0	0	NULL	45	46	48	NULL
10.1371/journal.pone.0084688	0	0	NULL	0	0	0	0	0	0	0	0	0	NULL	15	14	16	NULL
10.1371/journal.pone.0084736	0	0	NULL	0	0	0	0	0	0	0	0	0	NULL	16	19	20	NULL
10.1371/journal.pone.0084740	0	0	NULL	0	0	0	0	0	0	0	0	0	NULL	27	26	26	NULL
10.1371/journal.pone.0084751	0	0	NULL	0	0	0	0	0	0	0	0	0	NULL	19	18	20	NULL
10.1371/journal.pone.0084770	0	0	NULL	0	0	0	0	0	0	0	0	0	NULL	17	17	18	NULL
10.1371/journal.pone.0084788	0	0	NULL	0	0	0	0	0	0	0	0	0	NULL	9	10	11	NULL
10.1371/journal.pone.0084707	0	0	0	2	2	4	4	0	0	0	2	0	0	25	24	24	24
10.1371/journal.pone.0084713	0	0	0	0	0	1	1	0	0	0	0	0	0	38	35	38	35
10.1371/journal.pone.0084720	0	0	NULL	0	0	0	0	0	0	0	0	0	NULL	47	45	49	NULL
10.1371/journal.pone.0084724	0	0	0	1	1	2	2	0	0	0	0	0	0	20	19	22	19
10.1371/journal.pone.0084730	0	0	NULL	0	0	0	0	0	0	0	0	0	NULL	21	23	24	NULL
10.1371/journal.pone.0084746	0	0	NULL	0	0	0	0	0	0	0	0	0	NULL	16	15	15	NULL
10.1371/journal.pone.0084748	0	0	NULL	0	0	0	0	0	0	0	0	0	NULL	17	17	17	NULL
10.1371/journal.pone.0084781	0	0	NULL	0	0	0	0	0	0	0	0	0	NULL	46	15	15	NULL
10.1371/journal.pone.0084799	8	4	4	0	15	15	15	0	0	0	1	15	0	54	25	26	25
10.1371/journal.pone.0084811	1	0	NULL	0	0	0	0	0	0	0	0	0	NULL	7	8	10	NULL
10.1371/journal.pone.0084835	0	0	0	0	1	2	2	0	0	0	0	0	0	13	11	11	11
10.1371/journal.pone.0084839	48	24	7	6	10	20	19	0	0	0	0	0	0	17	20	22	20
10.1371/journal.pone.0084845	0	0	NULL	0	0	0	0	0	0	0	0	0	NULL	20	20	21	NULL
10.1371/journal.pone.0084868	0	0	0	0	0	1	1	0	0	0	0	0	0	5	5	5	4
10.1371/journal.pone.0084877	1260	40	14	184	46	219	206	0	0	0	0	0	0	51	56	58	56
10.1371/journal.pone.0084889	0	0	NULL	0	0	0	0	0	0	0	0	0	NULL	10	10	10	NULL
10.1371/journal.pone.0084897	0	0	0	0	1	1	1	0	0	0	0	0	0	29	20	22	20
10.1371/journal.pone.0084900	0	0	NULL	0	0	0	0	0	0	0	0	0	NULL	8	9	9	NULL
10.1371/journal.pone.0084918	0	0	0	0	0	0	0	0	0	0	0	0	0	10	10	10	10
10.1371/journal.pone.0084955	5	0	NULL	0	0	0	0	0	0	0	0	0	NULL	43	44	47	NULL
10.1371/journal.pone.0084963	2	2	1	0	3	3	3	0	0	0	0	0	0	31	33	33	33
10.1371/journal.pone.0084976	0	0	0	0	1	9	8	0	0	0	0	0	0	42	44	48	44
10.1371/journal.pone.0082493	0	0	0	0	0	2	2	0	0	0	0	0	0	59	58	59	58
10.1371/journal.pone.0082507	0	0	1	0	1	3	3	0	0	0	0	0	0	24	24	26	24
10.1371/journal.pone.0082533	0	0	0	0	3	8	5	0	0	0	0	0	0	29	36	37	36
10.1371/journal.pone.0082778	0	0	1	0	0	0	0	0	0	0	0	0	0	47	49	54	49
10.1371/journal.pone.0082894	0	0	NULL	0	0	0	0	0	0	0	0	0	NULL	11	NULL	0	NULL
10.1371/journal.pone.0082934	0	0	NULL	0	0	0	0	0	0	0	0	0	NULL	2	3	3	NULL
10.1371/journal.pone.0082986	2	0	NULL	0	0	0	0	0	0	0	0	2	NULL	29	30	31	NULL
10.1371/journal.pone.0082996	1	1	2	4	89	89	78	0	0	0	1	8	0	201	204	214	204
10.1371/journal.pone.0083002	0	0	0	0	6	9	8	0	0	0	0	0	0	40	44	46	44
10.1371/journal.pone.0083094	0	0	NULL	0	0	0	0	0	0	0	0	0	NULL	6	6	6	NULL
10.1371/journal.pone.0083124	0	0	0	0	13	25	23	0	0	0	0	0	0	73	68	68	68
10.1371/journal.pone.0083141	0	0	NULL	0	0	0	0	0	0	0	0	0	NULL	21	22	22	NULL
10.1371/journal.pone.0083184	0	0	0	0	2	0	0	0	0	0	0	0	0	9	NULL	0	1
10.1371/journal.pone.0083285	0	0	0	0	0	1	1	0	0	0	0	0	0	16	15	15	15
10.1371/journal.pone.0083296	0	0	0	1	0	1	1	0	0	0	0	0	0	19	19	19	19
10.1371/journal.pone.0083553	0	0	0	2	0	3	3	0	0	0	0	0	0	14	16	18	16
10.1371/journal.pone.0083604	0	0	0	0	3	3	3	0	0	0	0	0	0	8	8	8	8
10.1371/journal.pone.0083633	0	0	0	3	0	3	2	0	0	0	0	0	0	21	22	24	22
10.1371/journal.pone.0083645	0	0	1	40	39	42	39	0	0	3	4	13	2	96	37	37	37
10.1371/journal.pone.0083650	0	0	0	0	0	0	0	0	0	0	0	0	0	32	31	31	31
10.1371/journal.pone.0083668	4	1	0	0	4	9	9	0	0	1	1	30	1	83	91	94	91
10.1371/journal.pone.0083730	0	0	0	0	5	5	5	0	0	0	0	0	0	31	32	34	32
10.1371/journal.pone.0083957	1	0	0	0	0	1	1	0	0	0	0	0	0	10	10	12	10
10.1371/journal.pone.0083977	7	0	NULL	0	0	0	0	0	0	0	0	0	NULL	17	18	20	NULL
10.1371/journal.pone.0084038	0	0	NULL	0	0	0	0	0	0	0	0	0	NULL	9	10	11	NULL
10.1371/journal.pone.0084067	0	0	NULL	0	0	0	0	0	0	0	0	0	NULL	9	10	11	NULL
10.1371/journal.pone.0084082	2	0	0	2	7	10	10	0	0	0	0	0	0	22	24	24	24
10.1371/journal.pone.0084086	0	0	NULL	0	0	0	0	0	0	0	0	0	NULL	26	26	27	NULL
10.1371/journal.pone.0084145	0	0	0	0	4	9	7	0	0	0	0	0	0	31	25	27	25
10.1371/journal.pone.0084163	0	0	NULL	0	0	0	0	0	0	0	0	0	NULL	11	11	11	NULL
10.1371/journal.pone.0084208	0	0	0	0	4	4	3	0	0	0	0	0	0	43	42	43	42
10.1371/journal.pone.0084217	0	0	0	2	3	6	6	1	1	0	0	0	0	25	31	31	31
10.1371/journal.pone.0084233	0	0	0	0	3	4	4	0	0	0	0	0	0	14	13	13	13
10.1371/journal.pone.0084247	0	0	3	3	0	8	4	0	0	0	0	0	0	12	13	13	13
10.1371/journal.pone.0084268	0	0	0	0	0	1	1	0	0	0	0	0	0	16	18	18	18
10.1371/journal.pone.0084282	0	0	2	0	4	5	5	0	0	0	0	0	0	87	80	88	80
10.1371/journal.pone.0084285	1	0	0	0	1	5	5	0	0	0	0	0	0	23	27	29	27
10.1371/journal.pone.0084294	0	0	0	1	1	1	1	0	0	0	0	0	0	12	13	14	13
10.1371/journal.pone.0084312	135	24	20	163	122	164	156	0	0	0	0	0	0	104	102	102	102
10.1371/journal.pone.0084323	10	5	0	12	17	20	15	3	3	0	0	0	0	91	93	106	93
10.1371/journal.pone.0084359	0	0	0	0	1	2	2	0	0	0	0	0	0	50	49	52	49
10.1371/journal.pone.0084362	0	0	0	0	0	1	1	0	0	0	0	0	0	8	2	3	2
10.1371/journal.pone.0084416	0	0	1	0	0	1	1	0	0	0	0	0	0	33	32	32	32
10.1371/journal.pone.0084418	0	0	NULL	0	0	0	0	0	0	0	0	0	NULL	13	12	14	NULL
10.1371/journal.pone.0084981	0	0	0	1	0	2	2	0	0	0	0	0	0	41	36	39	36
10.1371/journal.pone.0085005	0	0	0	0	0	1	1	0	0	0	0	0	0	35	32	34	32
10.1371/journal.pone.0085028	0	0	0	1	0	1	1	0	0	0	0	0	0	12	12	13	12
10.1371/journal.pone.0085029	0	0	0	1	4	5	5	0	0	0	0	0	0	26	30	33	30
10.1371/journal.pone.0085033	0	0	NULL	0	0	0	0	0	0	0	0	0	NULL	29	30	31	NULL
10.1371/journal.pone.0085044	0	0	NULL	0	0	0	0	0	0	0	0	0	NULL	28	30	30	NULL
10.1371/journal.pone.0085089	0	0	NULL	0	0	0	0	0	0	0	0	4	NULL	27	27	27	NULL
10.1371/journal.pone.0085109	1	0	NULL	0	0	0	0	0	0	0	0	0	NULL	42	40	40	NULL
10.1371/journal.pone.0085115	0	0	1	4	1	7	7	0	0	0	0	0	0	17	17	20	17
10.1371/journal.pone.0085156	1	0	NULL	0	0	0	0	0	0	0	0	0	NULL	10	9	9	NULL
10.1371/journal.pone.0085174	0	0	NULL	0	0	0	0	0	0	0	0	0	NULL	18	18	19	NULL
10.1371/journal.pone.0085181	0	0	1	0	3	3	3	0	0	0	0	0	0	40	38	41	38
10.1371/journal.pone.0085212	0	0	2	0	0	0	0	0	0	0	0	0	0	14	15	15	15
10.1371/journal.pone.0085229	0	0	1	0	0	1	1	0	0	0	0	0	0	5	4	4	4
10.1371/journal.pone.0085233	14	7	4	0	13	12	12	0	0	0	0	0	0	26	26	27	26
10.1371/journal.pone.0085239	0	0	0	0	0	0	0	0	0	0	0	0	0	25	23	23	23
10.1371/journal.pone.0085249	0	0	0	0	0	0	0	0	0	0	0	0	0	11	15	16	15
10.1371/journal.pone.0085254	0	0	NULL	0	0	0	0	0	0	0	0	0	NULL	63	61	62	NULL
10.1371/journal.pone.0085259	0	0	NULL	0	0	0	0	0	0	0	0	0	NULL	5	6	6	NULL
10.1371/journal.pone.0085260	0	0	0	0	0	1	1	0	0	0	0	0	0	17	20	19	20
10.1371/journal.pone.0085266	0	0	NULL	0	0	0	0	0	0	0	0	0	NULL	46	49	50	NULL
10.1371/journal.pone.0085267	0	0	0	0	1	1	1	0	0	0	0	0	0	4	4	4	4
10.1371/journal.pone.0083750	0	0	0	0	0	1	1	0	0	0	0	0	0	27	27	27	27
10.1371/journal.pone.0083775	0	0	NULL	0	0	0	0	0	0	0	3	0	NULL	10	8	8	NULL
10.1371/journal.pone.0083798	0	0	0	0	0	1	1	0	0	0	0	0	0	8	8	9	8
10.1371/journal.pone.0083829	7	7	4	0	13	7	7	0	0	0	0	0	0	58	60	59	60
10.1371/journal.pone.0083912	0	0	0	9	8	8	8	0	0	0	0	0	0	21	21	21	21
10.1371/journal.pone.0083988	0	0	1	0	0	0	0	0	0	2	1	6	1	31	34	37	34
10.1371/journal.pone.0084011	0	0	0	1	1	4	3	0	0	0	0	0	0	29	29	32	29
10.1371/journal.pone.0084072	0	0	0	0	0	1	1	0	0	0	0	0	0	12	12	13	12
10.1371/journal.pone.0084153	0	0	0	2	0	4	4	0	0	0	0	0	0	75	76	79	76
10.1371/journal.pone.0084169	0	0	0	0	8	10	10	0	0	0	0	0	0	18	20	21	20
10.1371/journal.pone.0084192	0	0	0	2	1	4	4	0	0	0	0	0	0	25	19	19	19
10.1371/journal.pone.0084203	0	0	NULL	0	0	0	0	0	0	0	0	0	NULL	66	72	72	NULL
10.1371/journal.pone.0084259	0	0	0	0	1	1	1	0	0	0	0	0	0	14	13	13	13
10.1371/journal.pone.0084265	0	0	0	2	20	32	28	0	0	0	0	0	0	30	29	31	29
10.1371/journal.pone.0084274	0	0	0	0	1	2	2	0	0	0	0	0	0	35	39	39	39
10.1371/journal.pone.0084276	0	0	0	0	0	10	8	0	0	0	0	0	0	25	23	24	23
10.1371/journal.pone.0084297	0	0	0	0	0	0	0	0	0	0	0	0	0	44	44	47	44
10.1371/journal.pone.0084309	0	0	NULL	0	0	0	0	0	0	0	0	0	NULL	4	5	6	NULL
10.1371/journal.pone.0084317	12	0	4	1	0	3	2	0	0	0	0	0	0	41	42	47	42
10.1371/journal.pone.0084344	0	0	0	0	1	1	1	0	0	0	0	0	0	58	60	61	60
10.1371/journal.pone.0084346	0	0	0	0	1	1	1	0	0	0	0	0	0	11	11	11	11
10.1371/journal.pone.0084349	0	0	0	0	0	2	2	0	0	0	0	0	0	37	35	36	35
10.1371/journal.pone.0084428	0	0	0	1	0	8	6	0	0	0	0	0	0	15	14	15	14
10.1371/journal.pone.0084435	0	0	NULL	0	0	0	0	0	0	0	0	0	NULL	14	14	14	NULL
10.1371/journal.pone.0084456	0	0	1	0	0	0	0	0	0	0	0	0	0	5	5	6	5
10.1371/journal.pone.0084471	0	0	NULL	0	0	0	0	0	0	0	0	0	NULL	4	4	4	NULL
10.1371/journal.pone.0084491	0	0	0	9	5	10	9	0	0	0	0	0	0	20	17	17	17
10.1371/journal.pone.0084507	0	0	NULL	0	0	0	0	0	0	0	0	0	NULL	14	15	15	NULL
10.1371/journal.pone.0084531	0	0	0	1	2	4	4	0	0	0	0	0	0	17	20	23	20
10.1371/journal.pone.0084545	0	0	0	0	1	1	1	0	0	0	0	0	0	4	4	4	4
10.1371/journal.pone.0084547	0	0	1	0	1	4	4	0	0	0	0	0	0	100	85	89	85
10.1371/journal.pone.0084549	2112	92	91	209	192	235	231	0	0	1	1	2	0	89	86	89	86
10.1371/journal.pone.0084587	0	0	NULL	0	0	0	0	0	0	0	0	0	NULL	13	12	12	NULL
10.1371/journal.pone.0084617	0	0	0	0	2	2	2	0	0	0	0	0	0	5	5	5	5
10.1371/journal.pone.0084618	0	0	0	1	0	1	1	0	0	0	0	0	0	19	19	19	19
10.1371/journal.pone.0084635	2	1	5	2	3	7	7	0	0	0	0	0	0	44	45	49	45
10.1371/journal.pone.0084645	0	0	NULL	0	0	0	0	0	0	0	0	0	NULL	45	41	41	NULL
10.1371/journal.pone.0084686	0	0	NULL	2	0	0	0	0	0	0	0	0	NULL	27	27	29	NULL
10.1371/journal.pone.0084701	0	0	0	0	17	18	15	0	0	0	0	0	0	19	23	25	23
10.1371/journal.pone.0084704	0	0	0	0	0	1	1	0	0	0	0	0	0	39	46	47	46
10.1371/journal.pone.0084710	0	0	1	1	5	9	8	0	0	0	0	0	0	49	36	38	36
10.1371/journal.pone.0084711	20	10	6	3	55	55	47	0	0	0	0	0	0	25	25	25	25
10.1371/journal.pone.0084733	0	0	NULL	0	0	0	0	0	0	0	0	0	NULL	33	34	34	NULL
10.1371/journal.pone.0084739	0	0	0	0	0	1	1	0	0	0	0	0	0	64	62	67	62
10.1371/journal.pone.0085280	0	0	0	0	0	0	0	0	0	0	0	0	0	39	36	38	36
10.1371/journal.pone.0085283	10	0	1	2	2	8	8	0	0	0	0	0	0	20	23	24	23
10.1371/journal.pone.0085298	0	0	NULL	0	0	0	0	0	0	0	0	0	NULL	8	7	8	NULL
10.1371/journal.pone.0085301	0	0	NULL	0	0	0	0	0	0	0	0	0	NULL	34	35	36	NULL
10.1371/journal.pone.0085304	0	0	NULL	0	0	0	0	0	0	0	0	0	NULL	16	15	16	NULL
10.1371/journal.pone.0085308	1	0	NULL	0	0	0	0	0	0	0	0	0	NULL	29	25	26	NULL
10.1371/journal.pone.0085310	0	0	1	0	2	9	8	0	0	0	0	0	0	124	107	114	107
10.1371/journal.pone.0085313	0	0	NULL	0	0	0	0	0	0	0	0	0	NULL	10	10	11	NULL
10.1371/journal.pone.0085322	0	0	NULL	0	0	0	0	0	0	0	0	0	NULL	2	3	2	NULL
10.1371/journal.-pone.0085338	NULL	NULL	NULL	0	0	0	0	0	0	NULL	NULL	0	NULL	NULL	NULL	NULL	NULL
10.1371/journal.pone.0085341	0	0	NULL	0	0	0	0	0	0	0	0	0	NULL	12	14	18	NULL
10.1371/journal.pone.0085345	0	0	0	1	0	2	2	0	0	0	0	0	0	31	35	37	35
10.1371/journal.pone.0085360	4	2	NULL	0	0	0	0	0	0	0	0	0	NULL	9	8	8	NULL
10.1371/journal.pone.0085362	14	0	NULL	0	0	0	0	0	0	0	0	0	NULL	14	14	15	NULL
10.1371/journal.pone.0085366	0	0	0	0	2	1	1	0	0	0	0	0	0	14	15	16	15
10.1371/journal.pone.0085377	0	0	NULL	0	0	0	0	0	0	0	0	0	NULL	14	2	2	NULL
10.1371/journal.pone.0085390	0	0	NULL	0	0	0	0	0	0	0	0	0	NULL	11	11	11	NULL
10.1371/journal.pone.0085395	0	0	NULL	0	0	0	0	0	0	0	0	0	NULL	6	7	8	NULL
10.1371/journal.pone.0085409	0	0	NULL	0	0	0	0	0	0	0	0	0	NULL	6	4	4	NULL
10.1371/journal.pone.0085410	0	0	0	0	2	3	3	0	0	0	1	0	0	34	34	37	34
10.1371/journal.pone.0085413	0	0	NULL	0	0	0	0	0	0	0	0	0	NULL	37	40	41	NULL
10.1371/journal.pone.0085414	0	0	0	0	0	4	4	0	0	0	0	0	0	36	38	39	38
10.1371/journal.pone.0085415	0	0	0	0	2	2	2	0	0	0	0	0	0	18	20	20	20
10.1371/journal.pone.0084350	0	0	NULL	0	0	0	0	0	0	0	0	0	NULL	16	16	18	NULL
10.1371/journal.pone.0084353	0	0	0	0	0	2	2	0	0	0	0	0	0	37	31	33	31
10.1371/journal.pone.0084358	0	0	0	0	0	0	0	0	0	1	0	0	1	16	14	14	14
10.1371/journal.pone.0084392	34	17	NULL	0	0	0	0	0	0	0	0	0	NULL	14	15	15	NULL
10.1371/journal.pone.0084400	4	0	NULL	0	0	0	0	0	0	0	0	0	NULL	19	19	20	NULL
10.1371/journal.pone.0084412	0	0	NULL	0	0	0	0	0	0	0	0	0	NULL	20	21	21	NULL
10.1371/journal.pone.0084422	0	0	0	1	5	6	5	0	0	0	2	0	0	11	12	13	12
10.1371/journal.pone.0084478	0	0	0	0	0	0	0	0	0	0	0	0	0	47	16	12	16
10.1371/journal.pone.0084496	0	0	NULL	0	0	0	0	0	0	0	0	0	NULL	28	27	27	NULL
10.1371/journal.pone.0084500	0	0	0	0	2	4	4	0	0	0	0	0	0	30	30	31	30
10.1371/journal.pone.0084511	1	0	0	1	0	3	3	0	0	0	0	0	0	153	109	119	109
10.1371/journal.pone.0084516	0	0	NULL	0	0	0	0	0	0	0	0	0	NULL	6	5	5	NULL
10.1371/journal.pone.0084529	0	0	1	0	2	2	2	0	0	0	0	0	0	45	43	46	43
10.1371/journal.pone.0084532	0	0	NULL	0	0	0	0	0	0	0	0	0	NULL	10	11	11	NULL
10.1371/journal.pone.0084550	0	0	NULL	0	0	0	0	0	0	0	0	0	NULL	15	13	14	NULL
10.1371/journal.pone.0084560	0	0	0	0	1	4	2	0	0	0	0	0	0	47	47	46	47
10.1371/journal.pone.0084595	0	0	0	0	4	4	2	0	0	0	9	0	0	20	21	23	21
10.1371/journal.pone.0084596	0	0	NULL	0	0	0	0	0	0	0	0	0	NULL	18	19	21	NULL
10.1371/journal.pone.0084606	0	0	NULL	0	0	0	0	0	0	0	0	0	NULL	13	12	14	NULL
10.1371/journal.pone.0084608	6	3	0	8	4	9	8	0	0	0	0	0	0	24	22	25	22
10.1371/journal.pone.0084622	0	0	0	1	0	1	1	0	0	0	0	0	0	8	8	9	8
10.1371/journal.pone.0084636	0	0	0	0	0	2	2	0	0	0	0	2	0	13	13	13	13
10.1371/journal.pone.0084741	0	0	0	0	1	2	2	0	0	0	0	0	0	50	54	54	54
10.1371/journal.pone.0084745	0	0	NULL	0	0	0	0	0	0	0	0	0	NULL	16	17	15	NULL
10.1371/journal.pone.0084758	0	0	2	1	4	8	7	0	0	0	1	0	0	35	36	37	36
10.1371/journal.pone.0084785	0	0	0	0	7	7	7	0	0	0	0	0	0	35	36	37	36
10.1371/journal.pone.0084790	0	0	1	20	156	161	126	0	0	0	0	0	0	10	10	10	10
10.1371/journal.pone.0084808	0	0	NULL	0	0	0	0	0	0	0	0	0	NULL	14	13	13	NULL
10.1371/journal.pone.0084824	0	0	0	0	5	6	6	0	0	0	0	0	0	29	28	32	28
10.1371/journal.pone.0084829	0	0	0	1	0	1	1	0	0	0	1	0	0	5	7	8	7
10.1371/journal.pone.0084830	0	0	0	1	4	6	5	0	0	0	1	0	0	39	39	42	39
10.1371/journal.pone.0084853	0	0	NULL	0	0	0	0	0	0	0	0	0	NULL	52	54	54	NULL
10.1371/journal.pone.0084867	0	0	0	0	1	12	11	0	0	0	0	0	0	78	63	73	63
10.1371/journal.pone.0084874	0	0	0	0	0	1	1	0	0	0	7	0	0	13	12	12	12
10.1371/journal.pone.0084881	0	0	0	0	3	3	3	0	0	0	0	0	0	85	82	88	82
10.1371/journal.pone.0084885	0	0	NULL	0	0	0	0	0	0	0	0	0	NULL	17	19	19	NULL
10.1371/journal.pone.0084912	0	0	0	6	5	8	8	0	0	0	0	0	0	66	66	74	66
10.1371/journal.pone.0084914	0	0	0	0	2	3	3	0	0	0	0	0	0	50	47	51	47
10.1371/journal.pone.0084937	0	0	0	0	0	1	1	0	0	0	0	0	0	13	13	14	13
10.1371/journal.pone.0084943	0	0	0	1	6	4	4	0	0	0	0	0	0	73	67	71	67
10.1371/journal.pone.0084949	168	12	2	697	229	537	456	4	4	4	6	24	4	21	21	21	21
10.1371/journal.pone.0084995	0	0	NULL	0	0	0	0	0	0	1	1	0	NULL	39	36	39	NULL
10.1371/journal.pone.0084998	0	0	0	0	0	1	1	0	0	0	0	0	0	5	4	4	4
10.1371/journal.pone.0085000	0	0	NULL	0	0	0	0	0	0	0	0	0	NULL	16	17	17	NULL
10.1371/journal.pone.0085417	0	0	0	0	2	3	2	0	0	0	0	0	0	19	18	19	18
10.1371/journal.pone.0085421	0	0	NULL	0	0	0	0	0	0	0	0	0	NULL	23	26	28	NULL
10.1371/journal.pone.0085426	0	0	NULL	0	0	0	0	0	0	0	0	0	NULL	14	14	14	NULL
10.1371/journal.pone.0085451	0	0	0	2	1	2	2	0	0	0	0	0	0	9	10	10	10
10.1371/journal.pone.0085452	0	0	1	0	0	0	0	0	0	0	0	0	0	21	19	20	19
10.1371/journal.pone.0085455	0	0	0	0	0	2	2	0	0	0	0	0	0	9	10	10	10
10.1371/journal.pone.0085495	0	0	0	0	3	1	1	0	0	0	0	0	0	24	22	23	22
10.1371/journal.pone.0085508	0	0	NULL	0	0	0	0	0	0	0	0	0	NULL	36	36	39	NULL
10.1371/journal.pone.0085514	0	0	NULL	0	0	0	0	0	0	0	0	0	NULL	5	6	6	NULL
10.1371/journal.pone.0085516	0	0	0	0	3	7	6	0	0	0	0	0	0	22	23	25	23
10.1371/journal.pone.0085538	0	0	0	0	0	1	1	0	0	0	0	0	0	18	19	19	19
10.1371/journal.pone.0085552	0	0	NULL	0	0	0	0	0	0	0	0	0	NULL	9	9	9	NULL
10.1371/journal.pone.0085555	0	0	0	0	4	4	4	0	0	0	0	0	0	65	62	64	62
10.1371/journal.pone.0085574	0	0	0	1	5	5	4	0	0	0	0	0	0	40	42	44	42
10.1371/journal.pone.0085575	0	0	NULL	0	0	0	0	0	0	0	0	0	NULL	19	19	21	NULL
10.1371/journal.pone.0085596	0	0	NULL	0	0	0	0	0	0	0	0	0	NULL	41	44	53	NULL
10.1371/journal.pone.0085604	0	0	NULL	0	0	0	0	0	0	0	0	0	NULL	6	6	6	NULL
10.1371/journal.pone.0085614	0	0	NULL	0	0	0	0	0	0	0	0	0	NULL	5	5	5	NULL
10.1371/journal.pone.0085617	0	0	NULL	0	0	0	0	0	0	0	0	0	NULL	20	20	22	NULL
10.1371/journal.pone.0085621	0	0	0	1	0	1	1	0	0	0	0	0	0	13	16	15	16
10.1371/journal.pone.0085625	0	0	0	0	0	0	0	0	0	0	0	0	0	17	17	17	17
10.1371/journal.pone.0085673	4	0	10	47	47	68	55	0	0	0	0	0	0	10	8	8	10
10.1371/journal.pone.0084399	0	0	NULL	0	0	0	0	0	0	0	0	0	NULL	15	18	18	NULL
10.1371/journal.pone.0084402	0	0	0	3	0	4	4	0	0	0	0	0	0	45	43	45	43
10.1371/journal.pone.0084408	0	0	NULL	0	0	0	0	0	0	0	1	2	NULL	7	6	6	NULL
10.1371/journal.pone.0084427	0	0	0	2	0	2	2	0	0	0	0	0	0	1	3	1	3
10.1371/journal.pone.0084453	1	0	0	0	5	5	4	0	0	1	1	1	1	23	24	24	24
10.1371/journal.pone.0084463	0	0	NULL	0	0	0	0	0	0	0	0	0	NULL	11	11	11	NULL
10.1371/journal.pone.0084470	0	0	0	0	0	0	0	0	0	0	0	0	0	34	28	32	28
10.1371/journal.pone.0084484	0	0	0	0	1	2	2	0	0	0	0	0	0	23	27	23	27
10.1371/journal.pone.0084494	0	0	NULL	0	0	0	0	0	0	0	0	0	NULL	18	19	19	NULL
10.1371/journal.pone.0084509	0	0	0	0	0	1	1	0	0	0	0	0	0	15	15	15	15
10.1371/journal.pone.0084534	0	0	0	0	2	3	3	0	0	0	0	0	0	13	14	14	14
10.1371/journal.pone.0084536	0	0	NULL	0	0	0	0	0	0	0	0	0	NULL	34	45	41	NULL
10.1371/journal.pone.0084538	0	0	0	0	0	1	1	0	0	0	0	0	0	15	23	24	23
10.1371/journal.pone.0084571	0	0	NULL	0	0	0	0	0	0	0	0	0	NULL	19	20	21	NULL
10.1371/journal.pone.0084589	0	0	0	0	0	0	0	0	0	1	2	0	1	27	29	28	29
10.1371/journal.pone.0084601	0	0	NULL	0	0	0	0	0	0	0	0	0	NULL	15	15	15	NULL
10.1371/journal.pone.0084621	0	0	0	0	1	2	2	0	0	0	0	0	0	31	30	29	30
10.1371/journal.pone.0084627	1	0	NULL	0	0	0	0	0	0	0	0	0	NULL	14	13	13	NULL
10.1371/journal.pone.0084681	0	0	NULL	0	0	0	0	0	0	0	0	0	NULL	34	34	34	NULL
10.1371/journal.pone.0084706	0	0	0	0	1	1	1	0	0	0	0	0	0	19	19	19	19
10.1371/journal.pone.0084708	0	0	0	0	1	1	1	0	0	0	0	0	0	15	14	15	14
10.1371/journal.pone.0084709	0	0	4	0	15	15	13	0	0	8	14	25	7	36	35	37	35
10.1371/journal.pone.0084665	0	0	NULL	0	0	0	0	0	0	0	0	0	NULL	8	9	9	NULL
10.1371/journal.pone.0084670	0	0	0	0	0	1	1	0	0	0	0	0	0	8	7	7	7
10.1371/journal.pone.0084692	0	0	0	0	2	1	1	0	0	0	0	0	0	33	33	34	33
10.1371/journal.pone.0084696	0	0	0	0	1	2	2	0	0	0	0	0	0	16	15	16	15
10.1371/journal.pone.0084705	0	0	0	9	2	8	1	2	1	0	0	0	0	23	25	28	25
10.1371/journal.pone.0084729	0	0	NULL	0	0	0	0	0	0	0	0	0	NULL	39	36	35	NULL
10.1371/journal.pone.0084738	0	0	1	2	7	12	10	0	0	0	3	0	0	18	18	18	18
10.1371/journal.pone.0084743	0	0	NULL	0	0	0	0	0	0	0	0	0	NULL	15	12	12	NULL
10.1371/journal.pone.0084752	8	4	0	0	3	6	5	0	0	0	0	0	0	21	23	25	23
10.1371/journal.pone.0084754	0	0	0	1	19	27	19	0	0	0	0	0	0	20	19	19	19
10.1371/journal.pone.0084769	0	0	1	0	0	3	3	0	0	0	0	0	0	54	67	68	67
10.1371/journal.pone.0084810	0	0	0	0	2	3	3	0	0	0	0	0	0	21	23	24	23
10.1371/journal.pone.0084817	0	0	0	0	15	19	18	0	0	0	0	0	0	21	20	21	20
10.1371/journal.pone.0084836	0	0	0	1	3	3	3	0	0	0	0	0	0	22	22	21	22
10.1371/journal.pone.0084843	4	1	0	64	2	45	28	39	26	0	0	0	0	38	36	37	36
10.1371/journal.pone.0084846	0	0	NULL	0	0	0	0	0	0	0	0	0	NULL	6	6	6	NULL
10.1371/journal.pone.0084847	0	0	0	0	2	6	6	0	0	0	0	0	0	40	43	43	43
10.1371/journal.pone.0084860	1	0	2	3	81	87	75	0	0	0	0	0	0	42	46	47	46
10.1371/journal.pone.0084862	1	0	0	0	0	2	2	0	0	0	0	0	0	22	24	24	24
10.1371/journal.pone.0084878	0	0	NULL	0	0	0	0	0	0	0	0	0	NULL	7	7	7	NULL
10.1371/journal.pone.0084891	2	0	0	1	0	2	2	0	0	0	0	0	0	16	16	16	30
10.1371/journal.pone.0084915	0	0	NULL	0	0	0	0	0	0	0	0	0	NULL	2	2	2	NULL
10.1371/journal.pone.0084789	0	0	NULL	0	0	0	0	0	0	0	0	0	NULL	13	13	13	NULL
10.1371/journal.pone.0084803	0	0	0	2	0	3	3	0	0	0	0	0	0	24	23	24	23
10.1371/journal.pone.0084809	3	3	0	0	33	35	29	0	0	0	4	0	0	40	41	40	41
10.1371/journal.pone.0084831	0	0	0	0	1	1	1	0	0	0	12	0	0	15	15	15	15
10.1371/journal.pone.0084832	36	36	2	1	9	4	4	0	0	0	0	0	0	53	51	57	51
10.1371/journal.pone.0084884	5	0	0	6	3	24	24	0	0	0	0	0	0	51	51	52	51
10.1371/journal.pone.0084904	0	0	0	0	1	1	1	0	0	0	0	0	0	41	42	43	42
10.1371/journal.pone.0084921	0	0	NULL	0	0	0	0	0	0	0	0	0	NULL	25	28	30	NULL
10.1371/journal.pone.0084939	0	0	0	0	5	5	1	0	0	0	0	0	0	95	90	95	90
10.1371/journal.pone.0084942	12	5	2	11	12	13	13	0	0	3	4	7	3	59	62	64	62
10.1371/journal.pone.0084948	0	0	0	1	1	2	2	0	0	0	0	0	0	21	19	20	19
10.1371/journal.pone.0084950	0	0	0	7	4	11	10	0	0	0	0	0	0	12	11	12	11
10.1371/journal.pone.0084956	5	2	4	0	10	15	14	0	0	0	0	0	0	47	47	50	47
10.1371/journal.pone.0084958	0	0	0	0	0	1	1	0	0	0	0	0	0	14	14	15	14
10.1371/journal.pone.0084964	1	0	0	4	2	5	5	0	0	0	0	0	0	21	21	22	21
10.1371/journal.pone.0084971	0	0	0	0	0	1	1	0	0	0	0	0	0	37	34	35	34
10.1371/journal.pone.0084979	0	0	NULL	0	0	0	0	0	0	0	0	0	NULL	37	29	33	NULL
10.1371/journal.pone.0084985	0	0	NULL	0	0	0	0	0	0	0	0	0	NULL	19	20	21	NULL
10.1371/journal.pone.0085006	0	0	0	0	0	1	1	0	0	0	0	0	0	14	15	15	15
10.1371/journal.pone.0085013	0	0	1	0	9	15	12	0	0	0	0	0	0	21	22	24	22
10.1371/journal.pone.0085030	0	0	NULL	0	0	0	0	0	0	0	0	0	NULL	7	7	7	NULL
10.1371/journal.pone.0085055	0	0	0	0	0	1	1	0	0	0	0	0	0	9	10	10	10
10.1371/journal.pone.0085680	2	0	0	0	4	2	2	0	0	0	0	0	0	23	23	23	23
10.1371/journal.pone.0085684	0	0	1	0	2	3	3	0	0	0	0	0	0	11	10	10	10
10.1371/journal.pone.0085686	0	0	NULL	0	0	0	0	0	0	0	0	0	NULL	39	17	17	NULL
10.1371/journal.pone.0085687	0	0	NULL	0	0	0	0	0	0	0	0	0	NULL	16	17	17	NULL
10.1371/journal.pone.0085700	0	0	NULL	0	0	0	0	0	0	0	0	0	NULL	9	11	11	NULL
10.1371/journal.pone.0085703	0	0	NULL	0	0	0	0	0	0	0	0	0	NULL	9	9	9	NULL
10.1371/journal.pone.0085705	0	0	NULL	0	0	0	0	0	0	0	0	0	NULL	1	1	1	NULL
10.1371/journal.pone.0085713	0	0	0	0	1	1	1	0	0	0	0	0	0	27	27	29	27
10.1371/journal.pone.0085716	0	0	NULL	0	0	0	0	0	0	0	0	0	NULL	23	23	22	NULL
10.1371/journal.pone.0085725	0	0	1	3	18	28	26	0	0	0	0	0	0	112	104	109	104
10.1371/journal.pone.0085726	0	0	0	0	3	5	4	0	0	0	3	0	0	33	32	33	32
10.1371/journal.pone.0085732	0	0	0	0	0	0	0	0	0	0	0	0	0	31	30	31	30
10.1371/journal.pone.0085743	0	0	0	2	1	3	3	0	0	0	0	0	0	55	56	61	56
10.1371/journal.pone.0085768	0	0	0	0	0	1	1	0	0	0	0	0	0	34	37	37	37
10.1371/journal.pone.0085770	0	0	NULL	0	0	0	0	0	0	0	0	0	NULL	26	25	26	NULL
10.1371/journal.pone.0085772	0	0	NULL	0	0	0	0	0	0	0	0	0	NULL	20	18	18	NULL
10.1371/journal.pone.0085792	0	0	NULL	0	0	0	0	0	0	0	0	0	NULL	41	42	42	NULL
10.1371/journal.pone.0085810	0	0	1	1	0	3	3	0	0	0	0	0	0	18	17	21	17
10.1371/journal.pone.0085827	0	0	0	0	0	2	2	0	0	0	0	0	0	30	15	15	15
10.1371/journal.pone.0085843	2	0	NULL	0	0	0	0	0	0	0	0	0	NULL	34	32	32	NULL
10.1371/journal.pone.0085862	0	0	0	1	1	2	2	0	0	0	0	0	0	22	26	25	26
10.1371/journal.pone.0085863	0	0	0	1	0	3	3	0	0	0	0	0	0	15	15	15	15
10.1371/journal.pone.0084922	0	0	0	0	0	1	1	0	0	0	1	0	0	29	27	28	27
10.1371/journal.pone.0084945	0	0	0	0	4	4	4	0	0	0	0	0	0	25	26	32	26
10.1371/journal.pone.0084947	0	0	NULL	0	0	0	0	0	0	0	0	0	NULL	4	4	4	NULL
10.1371/journal.pone.0084954	2	0	0	1	2	7	7	0	0	0	0	0	0	32	32	34	32
10.1371/journal.pone.0084974	0	0	NULL	0	0	0	0	0	0	0	0	0	NULL	27	24	25	NULL
10.1371/journal.pone.0084987	0	0	0	0	1	1	1	0	0	0	0	0	0	28	27	29	27
10.1371/journal.pone.0085001	0	0	0	0	0	1	1	0	0	0	0	0	0	43	41	44	41
10.1371/journal.pone.0085025	0	0	NULL	0	0	0	0	0	0	0	0	0	NULL	13	13	14	NULL
10.1371/journal.pone.0085034	0	0	0	1	1	1	1	0	0	0	0	0	0	13	11	11	11
10.1371/journal.pone.0085042	2	1	0	1	5	6	6	0	0	0	0	0	0	29	27	28	27
10.1371/journal.pone.0085048	0	0	0	3	3	3	3	0	0	0	0	0	0	40	39	41	39
10.1371/journal.pone.0085054	0	0	0	2	0	2	1	0	0	0	0	0	0	28	21	20	21
10.1371/journal.pone.0085056	0	0	1	0	20	19	15	0	0	4	6	69	3	49	52	51	52
10.1371/journal.pone.0085068	0	0	NULL	0	0	0	0	0	0	0	0	0	NULL	16	8	9	NULL
10.1371/journal.pone.0085077	0	0	0	0	0	1	1	0	0	0	0	0	0	8	8	8	8
10.1371/journal.pone.0085078	0	0	NULL	0	0	0	0	0	0	0	0	0	NULL	11	10	10	NULL
10.1371/journal.pone.0085102	0	0	NULL	0	0	0	0	0	0	0	0	0	NULL	17	19	19	NULL
10.1371/journal.pone.0085118	20	3	0	2	4	7	6	0	0	0	0	0	0	46	49	52	49
10.1371/journal.pone.0085122	6	3	0	2	11	12	8	0	0	0	0	0	0	53	55	56	55
10.1371/journal.pone.0085128	0	0	0	1	1	2	2	0	0	0	0	0	0	27	26	28	26
10.1371/journal.pone.0085132	0	0	NULL	0	0	0	0	0	0	0	0	0	NULL	23	23	25	NULL
10.1371/journal.pone.0085139	0	0	0	0	0	1	1	0	0	0	0	0	0	13	14	14	14
10.1371/journal.pone.0085086	6	0	0	0	0	1	1	0	0	0	0	0	0	36	37	37	37
10.1371/journal.pone.0085101	42	42	0	0	2	2	2	0	0	0	0	0	0	14	14	15	14
10.1371/journal.pone.0085105	0	0	0	0	4	10	9	0	0	0	0	0	0	59	56	57	56
10.1371/journal.pone.0085136	0	0	NULL	0	0	0	0	0	0	0	0	0	NULL	14	14	14	NULL
10.1371/journal.pone.0085142	0	0	NULL	0	0	0	0	0	0	0	0	0	NULL	19	19	19	NULL
10.1371/journal.pone.0085145	0	0	NULL	0	0	0	0	0	0	0	0	0	NULL	9	8	8	NULL
10.1371/journal.pone.0085146	0	0	NULL	0	0	0	0	0	0	0	0	0	NULL	17	16	16	NULL
10.1371/journal.pone.0085159	0	0	0	0	0	1	1	0	0	0	0	0	0	8	8	8	8
10.1371/journal.pone.0085191	0	0	0	0	0	5	4	0	0	0	0	0	0	22	22	22	22
10.1371/journal.pone.0085192	8	3	0	2	4	6	5	0	0	0	0	0	0	122	121	127	121
10.1371/journal.pone.0085215	0	0	0	0	1	1	1	0	0	0	0	0	0	10	9	9	9
10.1371/journal.pone.0085227	0	0	0	0	0	4	4	0	0	0	0	0	0	16	14	15	14
10.1371/journal.pone.0085232	0	0	0	0	2	5	4	0	0	0	0	0	0	26	29	29	29
10.1371/journal.pone.0085245	5	0	0	1	1	17	17	0	0	1	1	3	1	66	75	78	75
10.1371/journal.pone.0085269	0	0	NULL	0	0	0	0	0	0	0	0	0	NULL	34	34	35	NULL
10.1371/journal.pone.0085279	0	0	1	0	4	4	4	0	0	0	0	0	0	121	83	84	83
10.1371/journal.pone.0085281	0	0	NULL	0	0	0	0	0	0	0	0	0	NULL	21	20	19	NULL
10.1371/journal.pone.0085291	0	0	1	24	24	22	19	0	0	2	5	10	2	75	74	75	74
10.1371/journal.pone.0085297	0	0	NULL	0	0	0	0	0	0	0	0	0	NULL	8	8	9	NULL
10.1371/journal.pone.0085312	0	0	NULL	0	0	0	0	0	0	0	0	0	NULL	5	5	5	NULL
10.1371/journal.pone.0085317	0	0	1	0	0	0	0	0	0	0	0	0	0	7	8	8	8
10.1371/journal.pone.0085327	0	0	0	0	4	6	6	0	0	0	0	0	0	39	37	39	37
10.1371/journal.pone.0085868	0	0	NULL	0	0	0	0	0	0	0	0	0	NULL	5	7	5	NULL
10.1371/journal.pone.0085869	0	0	0	0	0	7	4	0	0	0	0	0	0	53	48	52	48
10.1371/journal.pone.0085876	0	0	3	2	4	7	7	0	0	0	0	0	0	64	62	65	62
10.1371/journal.pone.0085888	0	0	0	1	0	1	1	0	0	0	0	0	0	24	24	24	24
10.1371/journal.pone.0085890	0	0	NULL	0	0	0	0	0	0	0	0	0	NULL	33	35	35	NULL
10.1371/journal.pone.0085896	0	0	1	0	0	0	0	0	0	0	0	0	0	6	6	6	6
10.1371/journal.pone.0085902	0	0	NULL	0	0	0	0	0	0	0	0	0	NULL	10	10	13	NULL
10.1371/journal.pone.0085906	0	0	NULL	0	0	0	0	0	0	0	0	0	NULL	7	7	7	NULL
10.1371/journal.pone.0085908	0	0	NULL	0	0	0	0	0	0	0	0	0	NULL	20	19	21	NULL
10.1371/journal.pone.0085914	2	0	1	4	6	13	10	0	0	0	1	0	0	33	34	32	34
10.1371/journal.pone.0085919	0	0	0	0	9	10	7	0	0	0	0	0	0	36	37	39	37
10.1371/journal.pone.0085920	0	0	NULL	0	0	0	0	0	0	0	0	0	NULL	34	32	32	NULL
10.1371/journal.pone.0085922	0	0	NULL	0	0	0	0	0	0	0	0	0	NULL	32	34	33	NULL
10.1371/journal.pone.0085936	0	0	NULL	0	0	0	0	0	0	0	0	0	NULL	8	6	6	NULL
10.1371/journal.pone.0085942	0	0	NULL	0	0	0	0	0	0	0	0	0	NULL	18	19	19	NULL
10.1371/journal.pone.0085953	0	0	0	0	1	1	1	0	0	0	0	0	0	13	13	14	13
10.1371/journal.pone.0085955	0	0	0	0	0	2	1	0	0	0	0	0	0	14	5	7	5
10.1371/journal.pone.0085963	0	0	NULL	0	0	0	0	0	0	0	0	0	NULL	4	4	4	NULL
10.1371/journal.pone.0085964	0	0	0	0	0	1	1	0	0	0	0	0	0	52	55	54	55
10.1371/journal.pone.0085965	0	0	NULL	0	0	0	0	0	0	0	0	0	NULL	9	9	9	NULL
10.1371/journal.pone.0085966	0	0	NULL	0	0	0	0	0	0	0	0	0	NULL	31	32	36	NULL
10.1371/journal.pone.0085969	0	0	NULL	0	0	0	0	0	0	0	0	0	NULL	10	12	15	NULL
10.1371/journal.pone.0085976	0	0	1	0	0	2	2	0	0	0	0	0	0	10	11	11	11
10.1371/journal.pone.0085152	0	0	NULL	0	0	0	0	0	0	0	0	0	NULL	64	63	64	NULL
10.1371/journal.pone.0085165	0	0	0	0	0	1	1	0	0	0	0	0	0	4	3	3	3
10.1371/journal.pone.0085169	0	0	NULL	0	0	0	0	0	0	0	0	0	NULL	7	8	9	NULL
10.1371/journal.pone.0085193	0	0	0	11	8	14	1	6	1	0	0	0	0	18	18	19	18
10.1371/journal.pone.0085198	0	0	1	0	0	0	0	0	0	0	0	0	0	3	3	3	3
10.1371/journal.pone.0085201	0	0	0	0	0	2	2	0	0	0	0	0	0	14	5	6	5
10.1371/journal.pone.0085202	4	0	2	2	5	9	9	0	0	0	0	0	0	95	80	81	80
10.1371/journal.pone.0085204	0	0	0	1	1	4	3	0	0	0	0	0	0	14	14	14	14
10.1371/journal.pone.0085208	0	0	1	0	0	0	0	0	0	0	0	0	0	34	34	36	34
10.1371/journal.pone.0085210	0	0	0	2	1	3	3	0	0	0	0	0	0	13	14	14	14
10.1371/journal.pone.0085220	0	0	0	0	1	1	1	0	0	0	0	0	0	5	6	7	6
10.1371/journal.pone.0085225	0	0	0	0	1	2	2	0	0	0	0	0	0	21	22	23	22
10.1371/journal.pone.0085230	1	0	0	1	0	1	1	0	0	0	0	0	0	13	14	18	14
10.1371/journal.pone.0085242	0	0	NULL	0	0	0	0	0	0	0	0	0	NULL	5	6	6	NULL
10.1371/journal.pone.0085250	0	0	NULL	0	0	0	0	0	0	0	0	0	NULL	17	17	17	NULL
10.1371/journal.pone.0085262	0	0	NULL	0	0	0	0	0	0	0	0	0	NULL	15	15	16	NULL
10.1371/journal.pone.0085271	0	0	0	5	3	8	8	0	0	0	0	0	0	16	16	19	16
10.1371/journal.pone.0085275	0	0	0	1	6	8	8	0	0	0	0	0	0	30	13	15	13
10.1371/journal.pone.0085276	2	1	1	0	1	1	1	0	0	0	0	0	0	46	48	47	48
10.1371/journal.pone.0085294	0	0	0	1	0	1	1	0	0	0	0	0	0	12	11	11	11
10.1371/journal.pone.0085305	0	0	0	0	1	1	1	0	0	0	0	0	0	35	28	28	28
10.1371/journal.pone.0085309	0	0	0	0	1	4	4	0	0	0	0	0	0	23	23	30	23
10.1371/journal.pone.0085329	0	0	1	0	0	0	0	0	0	0	0	0	0	2	2	2	2
10.1371/journal.pone.0085330	0	0	0	0	1	5	4	0	0	0	0	0	0	19	24	25	24
10.1371/journal.pone.0085336	0	0	1	0	17	15	15	0	0	0	0	0	0	87	90	92	90
10.1371/journal.pone.0085343	0	0	0	0	0	1	1	0	0	0	0	0	0	7	7	7	7
10.1371/journal.pone.0085354	0	0	NULL	0	0	0	0	0	0	0	0	0	NULL	6	6	6	NULL
10.1371/journal.pone.0085356	0	0	0	0	0	1	1	0	0	0	0	0	0	7	7	7	7
10.1371/journal.pone.0085367	0	0	NULL	0	0	0	0	0	0	0	0	0	NULL	30	29	29	NULL
10.1371/journal.pone.0085368	0	0	0	0	5	5	5	0	0	0	0	0	0	56	54	54	54
10.1371/journal.pone.0085372	42	11	4	5	8	9	7	0	0	0	0	0	0	47	46	47	46
10.1371/journal.pone.0085384	0	0	NULL	0	0	0	0	0	0	0	0	0	NULL	13	13	13	NULL
10.1371/journal.pone.0085389	0	0	NULL	0	0	0	0	0	0	0	0	0	NULL	20	22	22	NULL
10.1371/journal.pone.0085397	4	1	1	1	5	9	8	0	0	0	0	0	0	24	23	23	23
10.1371/journal.pone.0085405	0	0	NULL	0	0	0	0	0	0	0	0	0	NULL	31	34	34	NULL
10.1371/journal.pone.0085407	0	0	0	0	4	5	4	0	0	0	0	4	0	7	7	7	7
10.1371/journal.pone.0085436	2	1	9	3	26	31	29	0	0	0	0	0	0	64	58	58	58
10.1371/journal.pone.0085437	0	0	0	0	9	9	9	0	0	0	0	0	0	28	28	30	28
10.1371/journal.pone.0085439	0	0	0	0	6	7	7	0	0	0	1	0	0	34	35	36	35
10.1371/journal.pone.0085457	0	0	NULL	0	0	0	0	0	0	0	0	0	NULL	18	17	18	NULL
10.1371/journal.pone.0085465	0	0	NULL	0	0	0	0	0	0	0	0	0	NULL	7	8	8	NULL
10.1371/journal.pone.0085469	1	0	NULL	0	0	0	0	0	0	0	0	0	NULL	7	6	6	NULL
10.1371/journal.pone.0085470	12	6	1	0	3	3	3	0	0	2	4	0	2	39	38	40	38
10.1371/journal.pone.0085472	0	0	0	0	1	3	3	0	0	0	0	0	0	27	27	30	27
10.1371/journal.pone.0085978	1	1	0	1	1	4	3	0	0	0	0	0	0	45	43	46	43
10.1371/journal.pone.0085983	0	0	0	0	0	2	2	0	0	0	0	0	0	20	20	21	20
10.1371/journal.pone.0085984	0	0	NULL	0	0	0	0	0	0	0	0	0	NULL	16	16	16	NULL
10.1371/journal.pone.0086005	0	0	0	0	0	0	0	0	0	0	0	0	0	20	18	19	18
10.1371/journal.pone.0086008	0	0	0	0	3	9	9	0	0	0	0	0	0	11	11	12	11
10.1371/journal.pone.0086009	0	0	NULL	0	0	0	0	0	0	0	0	0	NULL	18	20	19	NULL
10.1371/journal.pone.0086015	0	0	0	0	0	1	1	0	0	0	0	0	0	19	15	15	15
10.1371/journal.pone.0086021	0	0	0	0	3	4	4	0	0	0	0	0	0	75	79	76	79
10.1371/journal.pone.0086022	0	0	0	0	10	11	11	0	0	0	0	0	0	16	11	11	11
10.1371/journal.pone.0086030	0	0	0	0	0	1	1	0	0	0	0	0	0	4	4	4	3
10.1371/journal.pone.0086034	0	0	NULL	0	0	0	0	0	0	0	0	0	NULL	6	6	6	NULL
10.1371/journal.pone.0086038	0	0	0	33	12	37	27	0	0	0	0	0	0	89	88	93	88
10.1371/journal.pone.0086044	1	0	1	2	0	3	3	0	0	0	0	0	0	20	18	19	18
10.1371/journal.pone.0086045	0	0	NULL	0	0	0	0	0	0	0	0	0	NULL	10	10	10	NULL
10.1371/journal.pone.0086051	18	0	4	2	1	6	6	0	0	0	0	0	0	20	19	22	19
10.1371/journal.pone.0086054	2	0	0	0	10	13	11	0	0	0	2	0	0	27	31	27	31
10.1371/journal.pone.0086056	0	0	1	0	0	2	2	0	0	0	0	0	0	15	14	14	15
10.1371/journal.pone.0086066	0	0	NULL	0	0	0	0	0	0	0	0	0	NULL	3	3	3	NULL
10.1371/journal.pone.0086078	0	0	0	6	0	13	13	0	0	0	0	0	0	37	39	39	39
10.1371/journal.pone.0086096	16	8	NULL	0	0	0	0	0	0	0	0	0	NULL	45	44	45	NULL
10.1371/journal.pone.0086104	0	0	0	0	0	2	2	0	0	0	0	0	0	14	15	15	15
10.1371/journal.pone.0086105	0	0	NULL	0	0	0	0	0	0	0	0	0	NULL	8	8	8	NULL
10.1371/journal.pone.0085315	0	0	0	0	0	4	4	0	0	0	0	0	0	26	25	27	25
10.1371/journal.pone.0085332	0	0	0	0	2	2	2	0	0	0	0	0	0	26	16	17	16
10.1371/journal.pone.0085334	0	0	1	0	0	1	1	0	0	0	0	0	0	14	15	16	15
10.1371/journal.pone.0085337	0	0	NULL	0	0	0	0	0	0	0	0	0	NULL	11	9	10	NULL
10.1371/journal.pone.0085346	0	0	NULL	0	0	0	0	0	0	0	0	0	NULL	33	34	36	NULL
10.1371/journal.pone.0085352	0	0	NULL	0	0	0	0	0	0	0	0	0	NULL	25	23	23	NULL
10.1371/journal.pone.0085357	0	0	NULL	0	0	0	0	0	0	0	0	0	NULL	10	9	9	NULL
10.1371/journal.pone.0085358	0	0	NULL	0	0	0	0	0	0	0	0	0	NULL	5	5	5	NULL
10.1371/journal.pone.0085363	0	0	NULL	0	0	0	0	0	0	0	0	0	NULL	8	4	4	NULL
10.1371/journal.pone.0085370	0	0	NULL	0	0	0	0	0	0	0	0	0	NULL	22	23	23	NULL
10.1371/journal.pone.0085374	0	0	0	0	3	3	3	0	0	0	0	0	0	22	20	21	20
10.1371/journal.pone.0085398	0	0	0	0	2	2	2	0	0	0	0	0	0	16	19	20	19
10.1371/journal.pone.0085400	2	0	0	1	1	2	2	0	0	0	0	0	0	14	14	15	14
10.1371/journal.pone.0085402	0	0	NULL	0	0	0	0	0	0	0	0	0	NULL	2	2	2	NULL
10.1371/journal.pone.0085416	14	0	3	0	4	4	2	0	0	0	0	0	0	45	38	40	38
10.1371/journal.pone.0085419	10	10	0	6	6	6	4	0	0	0	1	0	0	80	83	85	83
10.1371/journal.pone.0085422	0	0	NULL	0	0	0	0	0	0	0	0	0	NULL	32	30	32	NULL
10.1371/journal.pone.0085427	0	0	0	1	1	1	1	0	0	0	0	0	0	17	17	17	17
10.1371/journal.pone.0085434	0	0	0	1	1	7	5	0	0	0	0	0	0	34	38	39	38
10.1371/journal.pone.0085446	0	0	NULL	0	0	0	0	0	0	0	0	0	NULL	12	13	13	NULL
10.1371/journal.pone.0085461	0	0	NULL	0	0	0	0	0	0	0	0	0	NULL	25	24	24	NULL
10.1371/journal.pone.0085462	0	0	NULL	0	0	0	0	0	0	0	0	0	NULL	16	16	16	NULL
10.1371/journal.pone.0085463	0	0	0	1	1	2	2	0	0	0	0	0	0	12	10	10	10
10.1371/journal.pone.0085479	5	4	0	0	2	3	3	0	0	0	0	0	0	8	8	8	8
10.1371/journal.pone.0085511	1	0	1	0	17	17	15	0	0	0	0	0	0	12	12	12	12
10.1371/journal.pone.0085551	0	0	1	0	0	0	0	0	0	0	0	0	0	16	17	16	17
10.1371/journal.pone.0085556	4	0	0	0	0	3	3	0	0	0	0	0	0	13	13	13	13
10.1371/journal.pone.0085561	0	0	0	0	1	1	1	0	0	0	0	0	0	19	17	18	17
10.1371/journal.pone.0085566	0	0	NULL	0	0	0	0	0	0	0	0	0	NULL	10	11	11	NULL
10.1371/journal.pone.0085602	75	0	2	58	51	56	56	0	0	1	1	3	1	82	82	85	82
10.1371/journal.pone.0085608	0	0	NULL	0	2	0	0	0	0	0	0	0	NULL	18	17	18	NULL
10.1371/journal.pone.0085610	0	0	NULL	0	0	0	0	0	0	0	0	0	NULL	20	18	18	NULL
10.1371/journal.pone.0085626	0	0	0	0	1	1	1	0	0	0	0	0	0	20	24	24	24
10.1371/journal.pone.0085629	0	0	0	0	0	1	1	0	0	0	0	0	0	15	15	15	15
10.1371/journal.pone.0085633	0	0	0	0	4	4	4	0	0	0	0	0	0	73	76	75	76
10.1371/journal.pone.0085649	0	0	0	0	1	1	1	0	0	0	0	0	0	40	37	37	37
10.1371/journal.pone.0085653	0	0	NULL	0	0	0	0	0	0	0	0	0	NULL	23	21	22	NULL
10.1371/journal.pone.0085674	0	0	NULL	0	0	0	0	0	0	0	0	0	NULL	15	17	18	NULL
10.1371/journal.pone.0085694	0	0	NULL	0	0	0	0	0	0	0	0	0	NULL	14	15	16	NULL
10.1371/journal.pone.0085708	0	0	NULL	0	0	0	0	0	0	0	0	0	NULL	11	9	10	NULL
10.1371/journal.pone.0085712	12	6	0	2	2	2	2	0	0	0	0	0	0	19	21	22	21
10.1371/journal.pone.0085740	0	0	0	0	0	1	1	0	0	0	0	0	0	5	5	5	4
10.1371/journal.pone.0085747	0	0	0	1	4	6	6	0	0	0	0	0	0	81	80	86	80
10.1371/journal.pone.0085762	0	0	0	0	1	3	3	0	0	0	0	0	0	12	13	13	13
10.1371/journal.pone.0085767	0	0	NULL	0	0	0	0	0	0	0	0	0	NULL	8	7	8	NULL
10.1371/journal.pone.0086106	0	0	0	0	0	1	1	0	0	0	0	0	0	10	11	12	11
10.1371/journal.pone.0086127	0	0	1	20	23	20	19	0	0	0	0	0	0	43	42	42	42
10.1371/journal.pone.0086134	0	0	NULL	0	0	0	0	0	0	0	0	0	NULL	4	4	4	NULL
10.1371/journal.pone.0086136	0	0	0	0	1	1	1	0	0	0	0	0	0	49	50	54	50
10.1371/journal.pone.0086143	0	0	0	0	0	1	1	0	0	0	0	0	0	14	14	14	14
10.1371/journal.pone.0086148	0	0	NULL	0	0	0	0	0	0	0	0	0	NULL	14	15	16	NULL
10.1371/journal.pone.0086149	0	0	NULL	0	0	0	0	0	0	0	0	0	NULL	9	9	9	NULL
10.1371/journal.pone.0086154	0	0	NULL	0	0	0	0	0	0	0	0	0	NULL	11	7	7	NULL
10.1371/journal.pone.0086158	1	1	0	3	0	6	5	0	0	0	0	0	0	21	23	25	23
10.1371/journal.pone.0086160	0	0	0	0	0	1	1	0	0	0	0	0	0	15	15	15	15
10.1371/journal.pone.0086167	20	10	1	6	27	36	26	0	0	0	0	0	0	40	42	44	41
10.1371/journal.pone.0086193	0	0	0	18	18	18	18	0	0	1	9	9	1	31	34	33	34
10.1371/journal.pone.0086199	1	0	1	1	0	5	4	0	0	0	0	0	0	20	21	25	21
10.1371/journal.pone.0086204	0	0	NULL	0	0	0	0	0	0	0	0	0	NULL	9	8	10	NULL
10.1371/journal.pone.0086206	0	0	NULL	0	0	0	0	0	0	0	0	0	NULL	14	13	14	NULL
10.1371/journal.pone.0086215	0	0	NULL	0	0	0	0	0	0	0	0	0	NULL	13	21	21	NULL
10.1371/journal.pone.0086227	0	0	NULL	0	0	0	0	0	0	0	0	0	NULL	44	48	43	NULL
10.1371/journal.pone.0086234	0	0	NULL	1	0	0	0	0	0	0	0	0	NULL	5	5	5	NULL
10.1371/journal.pone.0086254	0	0	0	0	0	1	1	0	0	0	0	0	0	27	25	25	25
10.1371/journal.pone.0086299	0	0	NULL	0	0	0	0	0	0	0	0	0	NULL	45	45	50	NULL
10.1371/journal.pone.0086301	1	0	0	0	0	1	1	0	0	0	0	0	0	7	6	6	6
10.1371/journal.pone.0086305	0	0	NULL	0	0	0	0	0	0	0	0	0	NULL	75	67	72	NULL
10.1371/journal.pone.0085474	0	0	NULL	0	0	0	0	0	0	0	0	0	NULL	1	1	1	NULL
10.1371/journal.pone.0085477	0	0	NULL	0	0	0	0	0	0	0	0	0	NULL	23	22	24	NULL
10.1371/journal.pone.0085482	0	0	2	0	0	1	1	0	0	0	0	0	0	16	17	18	17
10.1371/journal.pone.0085485	0	0	0	0	0	2	2	0	0	0	7	0	0	25	24	24	24
10.1371/journal.pone.0085496	0	0	0	0	2	2	2	0	0	0	0	0	0	52	51	51	51
10.1371/journal.pone.0085503.g002	0	NULL	NULL	0	0	0	0	0	0	0	NULL	0	NULL	45	NULL	NULL	NULL
10.1371/journal.pone.0085504	0	0	0	0	0	1	1	0	0	0	0	0	0	20	22	22	22
10.1371/journal.pone.0085505	0	0	0	0	2	4	4	0	0	0	0	0	0	22	21	21	21
10.1371/journal.pone.0085510	1	0	0	0	0	2	2	0	0	0	0	0	0	55	54	55	54
10.1371/journal.pone.0085512	0	0	0	1	0	1	1	0	0	0	0	0	0	15	14	14	14
10.1371/journal.pone.0085513	0	0	0	2	1	5	5	0	0	0	0	0	0	15	15	15	15
10.1371/journal.pone.0085517	9	0	0	0	5	5	3	0	0	0	0	0	0	19	16	17	16
10.1371/journal.pone.0085523	0	0	0	1	0	1	1	0	0	0	0	0	0	24	22	22	22
10.1371/journal.pone.0085527	0	0	0	0	1	1	1	0	0	0	0	0	0	13	15	16	15
10.1371/journal.pone.0085528	0	0	NULL	0	0	0	0	0	0	0	0	0	NULL	10	10	10	NULL
10.1371/journal.pone.0085529	0	0	NULL	0	0	0	0	0	0	0	0	0	NULL	22	23	22	NULL
10.1371/journal.pone.0085536	0	0	NULL	0	0	0	0	0	0	0	0	0	NULL	10	10	10	NULL
10.1371/journal.pone.0085543	0	0	0	0	0	1	1	0	0	0	0	0	0	35	34	34	34
10.1371/journal.pone.0085544	0	0	0	0	0	3	3	0	0	0	0	0	0	10	2	3	10
10.1371/journal.pone.0085546	0	0	NULL	0	0	0	0	0	0	0	0	0	NULL	11	11	11	NULL
10.1371/journal.pone.0085568	0	0	0	0	0	1	1	0	0	0	0	0	0	80	72	78	72
10.1371/journal.pone.0085585	0	0	0	0	3	3	3	0	0	1	2	4	1	17	18	19	18
10.1371/journal.pone.0085781	0	0	NULL	0	0	0	0	0	0	0	0	0	NULL	28	31	32	NULL
10.1371/journal.pone.0085786	0	0	0	0	3	3	3	0	0	0	0	0	0	93	96	100	96
10.1371/journal.pone.0085800	0	0	NULL	0	0	0	0	0	0	0	0	0	NULL	12	11	10	NULL
10.1371/journal.pone.0085806	0	0	1	1	1	3	3	0	0	0	0	0	0	20	22	23	22
10.1371/journal.pone.0085813	0	0	0	0	1	1	1	0	0	0	6	0	0	23	24	24	24
10.1371/journal.pone.0085824	0	0	NULL	0	0	0	0	0	0	0	0	0	NULL	8	9	11	NULL
10.1371/journal.pone.0085855	0	0	0	0	0	0	0	0	0	0	0	0	0	37	39	45	39
10.1371/journal.pone.0085858	0	0	0	0	1	1	1	0	0	0	0	0	0	38	36	38	36
10.1371/journal.pone.0085875	0	0	0	0	1	2	2	0	0	0	1	0	0	8	7	7	7
10.1371/journal.pone.0085879	0	0	0	2	1	3	3	0	0	0	0	0	0	42	44	43	44
10.1371/journal.pone.0085893	0	0	NULL	0	0	0	0	0	0	0	0	0	NULL	10	8	10	NULL
10.1371/journal.pone.0085894	0	0	0	1	0	2	2	0	0	0	0	0	0	24	21	21	21
10.1371/journal.pone.0085898	0	0	0	0	0	1	1	0	0	0	0	0	0	10	9	9	9
10.1371/journal.pone.0085924	0	0	NULL	0	0	0	0	0	0	0	0	0	NULL	7	7	7	NULL
10.1371/journal.pone.0085927	0	0	NULL	0	3	0	0	0	0	0	0	0	NULL	19	21	23	NULL
10.1371/journal.pone.0085928	0	0	0	1	0	2	2	0	0	0	0	0	0	59	41	51	41
10.1371/journal.pone.0085935	2	0	0	0	0	0	0	0	0	0	0	0	0	14	14	14	14
10.1371/journal.pone.0085941	0	0	NULL	0	0	0	0	0	0	0	0	0	NULL	9	9	9	NULL
10.1371/journal.pone.0085956	10	1	0	10	12	10	10	0	0	0	0	0	0	90	83	88	83
10.1371/journal.pone.0085967	0	0	2	0	0	1	1	0	0	0	0	0	0	13	13	13	13
10.1371/journal.pone.0085973	2	0	0	0	2	3	3	0	0	0	0	0	0	20	23	24	23
10.1371/journal.pone.0085975	0	0	NULL	0	0	0	0	0	0	0	0	0	NULL	12	12	12	NULL
10.1371/journal.pone.0086320	0	0	NULL	0	0	0	0	0	0	0	0	0	NULL	22	16	16	NULL
10.1371/journal.pone.0086323	0	0	NULL	0	0	0	0	0	0	0	0	0	NULL	16	17	17	NULL
10.1371/journal.pone.0086326	0	0	0	0	0	3	3	0	0	0	0	0	0	21	19	20	19
10.1371/journal.pone.0086331	0	0	0	0	7	5	5	0	0	0	0	0	0	85	86	91	86
10.1371/journal.pone.0086344	0	0	NULL	0	0	0	0	0	0	0	0	0	NULL	9	9	9	NULL
10.1371/journal.pone.0086345	0	0	0	0	2	2	2	0	0	0	4	0	0	12	11	11	11
10.1371/journal.pone.0086366	2	0	1	1	0	1	1	0	0	0	0	0	0	65	65	70	65
10.1371/journal.pone.0086373	0	0	1	0	2	4	3	0	0	0	0	0	0	8	7	7	7
10.1371/journal.pone.0086376	0	0	NULL	0	0	0	0	0	0	0	0	0	NULL	13	12	13	NULL
10.1371/journal.pone.0086405	0	0	1	0	0	1	1	0	0	0	0	0	0	48	51	53	51
10.1371/journal.pone.0086427	0	0	0	2	2	4	4	0	0	0	0	0	0	59	62	68	62
10.1371/journal.pone.0086428	0	0	1	1	0	2	2	0	0	0	0	0	0	46	48	49	48
10.1371/journal.pone.0086442	0	0	0	0	0	1	1	0	0	0	0	0	0	28	27	28	27
10.1371/journal.pone.0086451	0	0	0	1	0	2	2	0	0	0	1	5	0	18	19	19	19
10.1371/journal.pone.0086460	0	0	NULL	0	0	0	0	0	0	0	0	0	NULL	22	20	20	NULL
10.1371/journal.pone.0086463	0	0	NULL	0	0	0	0	0	0	0	0	0	NULL	10	10	11	NULL
10.1371/journal.pone.0086464	2	2	0	0	7	6	6	0	0	0	0	0	0	106	117	119	117
10.1371/journal.pone.0086480	0	0	NULL	0	0	0	0	0	0	0	0	0	NULL	12	11	11	NULL
10.1371/journal.pone.0086481	0	0	NULL	0	0	0	0	0	0	0	0	0	NULL	12	15	18	NULL
10.1371/journal.pone.0086489	0	0	NULL	0	0	0	0	0	0	0	5	0	NULL	13	13	14	NULL
10.1371/journal.pone.0086496	0	0	0	0	9	12	9	0	0	0	0	0	0	95	51	53	51
10.1371/journal.pone.0086500	0	0	0	6	1	6	6	0	0	0	1	0	0	42	44	46	44
10.1371/journal.pone.0085591	0	0	0	0	0	1	1	0	0	0	0	0	0	68	70	73	70
10.1371/journal.pone.0085597	0	0	NULL	0	0	0	0	0	0	0	0	0	NULL	11	11	11	NULL
10.1371/journal.pone.0085612	0	0	0	0	0	3	2	0	0	0	0	0	0	12	11	11	11
10.1371/journal.pone.0085616	0	0	0	0	0	1	1	0	0	0	0	0	0	15	16	18	16
10.1371/journal.pone.0085618	0	0	0	0	0	2	2	0	0	0	0	0	0	16	14	15	14
10.1371/journal.pone.0085628	0	0	NULL	0	0	0	0	0	0	0	0	0	NULL	43	44	45	NULL
10.1371/journal.pone.0085631	0	0	0	0	1	1	1	0	0	0	0	0	0	23	24	24	24
10.1371/journal.pone.0085636	2	0	0	4	0	7	7	0	0	0	0	0	0	34	35	34	35
10.1371/journal.pone.0085640	9	0	2	3	6	7	4	0	0	0	0	0	0	54	57	58	57
10.1371/journal.pone.0085645	0	0	0	0	3	3	3	0	0	0	2	0	0	35	30	33	30
10.1371/journal.pone.0085651	0	0	0	0	0	1	1	0	0	0	0	0	0	3	5	5	5
10.1371/journal.pone.0085654	0	0	0	0	1	2	2	0	0	0	0	0	0	17	20	19	20
10.1371/journal.pone.0085661	0	0	0	0	0	3	3	0	0	0	0	0	0	39	40	44	40
10.1371/journal.pone.0085667	0	0	NULL	0	0	0	0	0	0	0	0	0	NULL	24	25	26	NULL
10.1371/journal.pone.0085668	0	0	0	0	0	5	5	0	0	0	0	0	0	10	11	12	11
10.1371/journal.pone.0085669	0	0	NULL	0	0	0	0	0	0	0	0	0	NULL	7	7	8	NULL
10.1371/journal.pone.0085677	0	0	0	0	1	4	3	0	0	8	8	42	8	7	9	9	9
10.1371/journal.pone.0085720	0	0	0	1	0	2	2	0	0	0	0	0	0	30	33	33	33
10.1371/journal.pone.0085731	0	0	0	0	1	1	1	0	0	0	5	0	0	55	57	64	57
10.1371/journal.pone.0085734	0	0	0	2	1	4	3	0	0	0	0	0	0	52	51	53	51
10.1371/journal.pone.0085745	0	0	NULL	0	0	0	0	0	0	0	0	0	NULL	12	12	12	NULL
10.1371/journal.pone.0085756	0	0	0	0	1	1	1	0	0	0	0	0	0	40	34	35	34
10.1371/journal.pone.0085760	6	0	1	1	0	7	5	0	0	0	0	0	0	37	35	36	35
10.1371/journal.pone.0085774	0	0	0	0	0	3	3	0	0	0	0	0	0	61	61	66	61
10.1371/journal.pone.0085783	0	0	0	1	0	2	2	0	0	0	0	0	0	25	24	24	24
10.1371/journal.pone.0085787	0	0	0	0	2	2	2	0	0	0	0	0	0	48	46	49	46
10.1371/journal.pone.0085790	0	0	0	1	5	5	5	0	0	0	0	0	0	6	6	6	6
10.1371/journal.pone.0085794	0	0	1	0	21	21	21	0	0	0	0	0	0	74	74	77	74
10.1371/journal.pone.0085796	0	0	0	1	0	2	2	0	0	0	0	0	0	19	19	20	19
10.1371/journal.pone.0085797	2	0	0	0	0	2	2	0	0	0	0	0	0	9	11	11	11
10.1371/journal.pone.0085798	0	0	0	0	4	11	8	0	0	0	0	0	0	49	49	50	49
10.1371/journal.pone.0085811	2	0	NULL	0	0	0	0	0	0	0	0	0	NULL	5	5	5	NULL
10.1371/journal.pone.0085830	0	0	NULL	0	0	0	0	0	0	0	0	0	NULL	20	21	21	NULL
10.1371/journal.pone.0085838	0	0	NULL	0	0	0	0	0	0	0	0	0	NULL	11	11	11	NULL
10.1371/journal.pone.0085847	0	0	NULL	0	0	0	0	0	0	0	0	0	NULL	11	11	11	NULL
10.1371/journal.pone.0085854	0	0	0	1	0	1	1	0	0	0	0	0	0	37	38	39	37
10.1371/journal.pone.0085871	0	0	0	0	0	0	0	0	0	0	0	0	0	36	37	37	37
10.1371/journal.pone.0085877	0	0	0	0	3	4	4	0	0	0	0	0	0	32	31	31	31
10.1371/journal.pone.0085892	0	0	NULL	0	0	0	0	0	0	0	0	0	NULL	5	7	7	NULL
10.1371/journal.pone.0085917	9	0	1	0	0	1	1	0	0	0	0	0	0	50	49	50	49
10.1371/journal.pone.0085925	0	0	0	1	10	11	10	0	0	0	0	0	0	33	36	36	36
10.1371/journal.pone.0085959	0	0	NULL	0	0	0	0	0	0	0	0	0	NULL	20	15	15	NULL
10.1371/journal.pone.0085974	0	0	0	4	1	5	3	2	2	0	0	0	0	22	22	24	22
10.1371/journal.pone.0085990	0	0	0	1	12	15	13	0	0	0	0	0	0	19	20	20	20
10.1371/journal.pone.0085010	0	0	NULL	0	0	0	0	0	0	0	0	0	NULL	8	7	7	NULL
10.1371/journal.pone.0085021	0	0	0	0	0	2	2	0	0	0	0	0	0	31	32	35	32
10.1371/journal.pone.0085043	0	0	NULL	0	0	0	0	0	0	0	0	0	NULL	12	13	13	NULL
10.1371/journal.pone.0085050	0	0	0	0	0	1	1	0	0	0	0	0	0	22	24	25	24
10.1371/journal.pone.0085059	0	0	0	1	0	3	3	0	0	0	2	0	0	17	18	18	18
10.1371/journal.pone.0085060	0	0	0	0	1	1	1	0	0	0	1	0	0	31	31	32	31
10.1371/journal.pone.0085104	3	0	1	1	1	2	2	0	0	0	0	0	0	24	26	27	26
10.1371/journal.pone.0085110	0	0	NULL	0	0	0	0	0	0	0	0	0	NULL	43	47	46	NULL
10.1371/journal.pone.0085125	0	0	0	0	0	1	1	0	0	0	0	0	0	15	14	14	14
10.1371/journal.pone.0085127	0	0	NULL	0	0	0	0	0	0	0	0	0	NULL	37	41	42	NULL
10.1371/journal.pone.0085167	0	0	0	0	0	1	1	0	0	0	0	0	0	23	23	24	23
10.1371/journal.pone.0085194	0	0	0	0	2	2	2	0	0	0	0	0	0	5	4	4	4
10.1371/journal.pone.0085196	0	0	0	0	5	2	2	0	0	0	1	0	0	51	53	54	53
10.1371/journal.pone.0085209	0	0	0	0	0	1	1	0	0	0	0	0	0	11	11	12	11
10.1371/journal.pone.0085252	0	0	NULL	0	0	0	0	0	0	0	0	0	NULL	7	7	7	NULL
10.1371/journal.pone.0085255	2	1	0	13	6	19	13	0	0	0	0	0	0	27	27	28	27
10.1371/journal.pone.0085268	0	0	0	0	3	9	9	0	0	0	0	0	0	70	66	71	66
10.1371/journal.pone.0085288	0	0	0	0	0	1	1	0	0	0	0	0	0	21	21	21	21
10.1371/journal.pone.0085290	0	0	NULL	0	0	0	0	0	0	0	0	0	NULL	3	3	3	NULL
10.1371/journal.pone.0085299	0	0	1	0	10	12	10	0	0	0	0	0	0	16	16	18	16
10.1371/journal.pone.0085306	0	0	0	0	1	1	1	0	0	0	0	0	0	34	31	36	31
10.1371/journal.pone.0085320	0	0	0	0	1	1	1	0	0	0	0	0	0	24	24	24	24
10.1371/journal.pone.0086501	0	0	0	1	9	9	1	0	0	0	7	14	0	22	21	22	21
10.1371/journal.pone.0086502	0	0	0	0	1	1	1	0	0	0	0	0	0	32	31	31	31
10.1371/journal.pone.0086513	0	0	0	0	0	0	0	0	0	0	0	0	0	41	42	42	42
10.1371/journal.pone.0086517	0	0	0	0	1	1	1	0	0	0	0	0	0	8	10	8	10
10.1371/journal.pone.0086521	0	0	0	0	0	0	0	0	0	0	0	0	0	14	18	19	18
10.1371/journal.pone.0086531	0	0	0	0	6	4	4	0	0	0	0	0	0	8	8	8	8
10.1371/journal.pone.0086543	0	0	NULL	0	0	0	0	0	0	0	0	0	NULL	14	14	14	NULL
10.1371/journal.pone.0086551	0	0	0	1	0	2	2	0	0	1	1	3	0	30	30	33	30
10.1371/journal.pone.0086560	0	0	0	0	1	3	3	0	0	0	0	0	0	31	26	27	26
10.1371/journal.pone.0086565	1	0	0	0	0	0	0	0	0	0	0	0	0	18	19	20	19
10.1371/journal.pone.0086569	1	0	NULL	0	0	0	0	0	0	0	0	0	NULL	3	3	3	NULL
10.1371/journal.pone.0086610	0	0	0	2	2	2	2	0	0	0	0	0	0	27	27	28	27
10.1371/journal.pone.0086614	0	0	0	0	0	4	2	0	0	0	0	0	0	30	30	30	30
10.1371/journal.pone.0086616	0	0	0	0	0	1	1	0	0	0	0	0	0	71	69	71	69
10.1371/journal.pone.0086619	0	0	NULL	0	0	0	0	0	0	0	0	0	NULL	11	11	11	NULL
10.1371/journal.pone.0086640	0	0	NULL	0	0	0	0	0	0	0	0	0	NULL	20	20	23	NULL
10.1371/journal.pone.0086644	0	0	0	0	1	1	1	0	0	0	0	0	0	12	12	12	12
10.1371/journal.pone.0086649	0	0	NULL	0	0	0	0	0	0	0	0	0	NULL	8	8	8	NULL
10.1371/journal.pone.0086651	6	3	NULL	0	0	0	0	0	0	0	0	0	NULL	12	11	11	NULL
10.1371/journal.pone.0086659	0	0	NULL	0	0	0	0	0	0	0	0	0	NULL	18	19	19	NULL
10.1371/journal.pone.0086660	0	0	0	1	0	1	1	0	0	0	0	0	0	60	63	64	63
10.1371/journal.pone.0086670	0	0	NULL	0	0	0	0	0	0	0	0	0	NULL	20	19	19	NULL
10.1371/journal.pone.0085994	0	0	NULL	0	0	0	0	0	0	0	0	0	NULL	18	19	19	NULL
10.1371/journal.pone.0086000	0	0	0	0	2	3	3	0	0	0	0	0	0	34	33	32	33
10.1371/journal.pone.0086002	0	0	0	0	0	1	1	0	0	0	0	0	0	21	22	22	22
10.1371/journal.pone.0086006	0	0	NULL	0	0	0	0	0	0	0	0	0	NULL	8	9	9	NULL
10.1371/journal.pone.0086011	4	2	0	0	12	12	2	0	0	0	0	0	0	14	11	13	11
10.1371/journal.pone.0086029	0	0	NULL	0	0	0	0	0	0	0	0	0	NULL	18	19	19	NULL
10.1371/journal.pone.0086040	0	0	0	0	0	0	0	0	0	2	1	20	2	11	11	11	11
10.1371/journal.pone.0086046	0	0	0	5	0	15	12	0	0	0	0	0	0	54	40	42	40
10.1371/journal.pone.0086048	0	0	0	0	1	1	1	0	0	0	0	0	0	11	7	5	7
10.1371/journal.pone.0086072	0	0	0	0	3	2	2	0	0	0	0	0	0	55	35	34	35
10.1371/journal.pone.0086103	0	0	0	1	2	1	1	0	0	0	0	0	0	7	5	5	5
10.1371/journal.pone.0086116	0	0	0	0	0	3	2	0	0	0	0	0	0	26	25	27	25
10.1371/journal.pone.0086120	0	0	0	0	1	1	1	0	0	0	0	0	0	12	12	12	12
10.1371/journal.pone.0086142	0	0	NULL	0	0	0	0	0	0	0	0	0	NULL	18	16	16	NULL
10.1371/journal.pone.0086144	0	0	0	0	0	1	1	0	0	0	0	0	0	14	13	14	13
10.1371/journal.pone.0086150	0	0	NULL	0	0	0	0	0	0	0	0	0	NULL	6	6	6	NULL
10.1371/journal.pone.0086151	0	0	NULL	0	0	0	0	0	0	0	1	0	NULL	19	19	19	NULL
10.1371/journal.pone.0086159	0	0	0	1	0	1	1	0	0	0	0	0	0	13	12	13	12
10.1371/journal.pone.0086161	2	0	NULL	0	0	0	0	0	0	0	0	0	NULL	19	21	21	NULL
10.1371/journal.pone.0086162	0	0	0	0	1	1	1	0	0	0	0	0	0	11	6	6	6
10.1371/journal.pone.0086169	21485	19	13	109	115	115	90	0	0	0	0	0	0	76	73	74	73
10.1371/journal.pone.0086178	0	0	0	1	0	1	1	0	0	0	0	0	0	45	47	48	47
10.1371/journal.pone.0086675	0	0	0	0	1	2	2	0	0	0	0	0	0	20	24	22	24
10.1371/journal.pone.0086682	0	0	4	0	10	10	10	0	0	0	0	0	0	65	65	71	65
10.1371/journal.pone.0086683	0	0	1	1	0	6	6	0	0	0	0	0	0	30	28	28	28
10.1371/journal.pone.0086689	0	0	0	0	4	5	5	0	0	0	0	0	0	18	13	11	13
10.1371/journal.pone.0086693	0	0	0	0	0	0	0	0	0	0	0	0	0	33	31	32	31
10.1371/journal.pone.0086697	0	0	NULL	0	0	0	0	0	0	0	0	0	NULL	12	11	11	NULL
10.1371/journal.pone.0086717	0	0	0	0	0	1	1	0	0	0	0	0	0	61	58	59	58
10.1371/journal.pone.0086728	0	0	0	0	0	2	2	0	0	0	0	0	0	52	47	48	47
10.1371/journal.pone.0086732	0	0	1	0	0	0	0	0	0	0	0	0	0	24	26	26	26
10.1371/journal.pone.0086735	0	0	0	0	1	1	1	0	0	0	0	0	0	7	8	8	8
10.1371/journal.pone.0086736	0	0	0	0	1	1	1	0	0	0	0	0	0	5	5	5	5
10.1371/journal.pone.0086737	0	0	0	0	0	0	0	0	0	0	0	0	0	18	16	17	16
10.1371/journal.pone.0086738	0	0	NULL	0	0	0	0	0	0	0	0	0	NULL	36	40	40	NULL
10.1371/journal.pone.0086739	0	0	NULL	0	0	0	0	0	0	0	0	0	NULL	19	20	20	NULL
10.1371/journal.pone.0086746	0	0	0	1	7	5	1	0	0	0	0	0	0	79	82	85	82
10.1371/journal.pone.0086776	9	0	1	0	0	0	0	0	0	0	0	0	0	21	21	23	21
10.1371/journal.pone.0086784	0	0	0	0	2	2	2	0	0	0	0	0	0	13	15	15	15
10.1371/journal.pone.0086789	0	0	NULL	0	0	0	0	0	0	0	0	0	NULL	15	15	16	NULL
10.1371/journal.pone.0086804	2	1	1	0	0	0	0	0	0	0	0	0	0	54	57	59	57
10.1371/journal.pone.0086812	0	0	0	0	0	2	2	0	0	0	0	0	0	10	10	9	10
10.1371/journal.pone.0086818	0	0	0	0	1	1	1	0	0	0	0	0	0	33	33	32	33
10.1371/journal.pone.0086821	0	0	0	0	0	1	1	0	0	0	0	0	0	30	29	31	29
10.1371/journal.pone.0085323	4	0	0	1	1	2	2	0	0	0	0	0	0	43	43	45	43
10.1371/journal.pone.0085325	0	0	NULL	0	0	0	0	0	0	0	8	0	NULL	22	21	22	NULL
10.1371/journal.pone.0085331	2	0	0	0	12	13	10	0	0	0	0	0	0	39	31	35	31
10.1371/journal.pone.0085333	0	0	0	2	1	5	5	0	0	0	0	0	0	32	30	30	30
10.1371/journal.pone.0085348	0	0	0	2	4	4	3	1	1	0	0	0	0	9	10	11	10
10.1371/journal.pone.0085361	0	0	NULL	0	0	0	0	0	0	0	0	0	NULL	16	15	15	NULL
10.1371/journal.pone.0085373	0	0	NULL	0	0	0	0	0	0	0	0	0	NULL	17	17	18	NULL
10.1371/journal.pone.0085379	0	0	NULL	0	0	0	0	0	0	0	0	0	NULL	19	18	19	NULL
10.1371/journal.pone.0085380	0	0	0	0	0	2	2	0	0	0	0	0	0	25	25	26	25
10.1371/journal.pone.0085396	0	0	NULL	0	0	0	0	0	0	0	0	0	NULL	12	12	12	NULL
10.1371/journal.pone.0085406	4	0	1	1	0	1	1	0	0	0	0	0	0	6	9	9	9
10.1371/journal.pone.0085445	0	0	NULL	0	0	0	0	0	0	0	0	0	NULL	21	23	19	NULL
10.1371/journal.pone.0085448	0	0	0	0	26	32	29	0	0	0	0	0	0	55	53	57	53
10.1371/journal.pone.0085459	0	0	0	0	0	1	1	0	0	0	0	0	0	31	29	35	29
10.1371/journal.pone.0085471	0	0	0	0	0	1	1	0	0	0	0	0	0	0	14	15	16
10.1371/journal.pone.0085491	0	0	NULL	0	0	0	0	0	0	0	0	0	NULL	23	23	24	NULL
10.1371/journal.pone.0085509	0	0	0	0	1	2	2	0	0	0	0	0	0	18	21	21	21
10.1371/journal.pone.0085520	0	0	NULL	0	0	0	0	0	0	0	0	0	NULL	14	18	19	NULL
10.1371/journal.pone.0085522	0	0	NULL	0	0	0	0	0	0	0	0	0	NULL	10	10	13	NULL
10.1371/journal.pone.0085533	0	0	NULL	0	0	0	0	0	0	0	0	0	NULL	24	26	26	NULL
10.1371/journal.pone.0085537	0	0	NULL	0	0	0	0	0	0	0	0	0	NULL	14	15	15	NULL
10.1371/journal.pone.0085539	0	0	1	0	0	2	2	0	0	0	0	0	0	12	11	12	11
10.1371/journal.pone.0085540	0	0	0	1	3	10	10	0	0	0	0	0	0	52	46	47	46
10.1371/journal.pone.0085545	0	0	NULL	0	0	0	0	0	0	0	0	0	NULL	23	21	22	NULL
10.1371/journal.pone.0085553	0	0	0	0	1	1	1	0	0	0	0	0	0	7	8	8	8
10.1371/journal.pone.0085564	0	0	0	1	1	1	1	1	1	0	1	0	0	20	17	18	17
10.1371/journal.pone.0085576	0	0	0	0	0	0	0	0	0	2	3	1	2	47	50	52	50
10.1371/journal.pone.0085577	0	0	NULL	0	0	0	0	0	0	0	0	0	NULL	3	2	2	NULL
10.1371/journal.pone.0085581	0	0	NULL	0	0	0	0	0	0	0	0	0	NULL	5	6	5	NULL
10.1371/journal.pone.0085582	0	0	0	0	1	1	1	0	0	0	0	0	0	32	30	32	30
10.1371/journal.pone.0085587	0	0	0	0	0	1	1	0	0	0	0	0	0	17	17	17	17
10.1371/journal.pone.0085590	0	0	NULL	0	0	0	0	0	0	0	0	0	NULL	15	15	15	NULL
10.1371/journal.pone.0085592	0	0	NULL	0	0	0	0	0	0	0	0	0	NULL	7	7	7	NULL
10.1371/journal.pone.0085615	0	0	0	0	0	1	1	0	0	0	0	0	0	6	6	6	6
10.1371/journal.pone.0085627	3	1	0	0	13	26	21	0	0	0	0	0	0	42	43	46	43
10.1371/journal.pone.0085641	0	0	4	0	0	2	2	0	0	0	0	0	0	24	23	23	23
10.1371/journal.pone.0085643	2	0	0	3	2	7	3	0	0	0	0	0	0	19	22	21	22
10.1371/journal.pone.0085647	4	2	0	0	11	10	10	0	0	0	0	0	0	37	38	38	38
10.1371/journal.pone.0085659	0	0	1	0	0	0	0	0	0	0	0	0	0	32	33	34	33
10.1371/journal.pone.0085678	4	0	0	1	3	3	2	1	1	1	1	0	1	62	61	65	61
10.1371/journal.pone.0085679	8	4	0	2	24	34	32	0	0	0	0	0	1	33	30	31	30
10.1371/journal.pone.0085690	0	0	NULL	0	0	0	0	0	0	0	0	0	NULL	11	10	11	NULL
10.1371/journal.pone.0085699	0	0	NULL	0	0	0	0	0	0	0	0	0	NULL	19	19	21	NULL
10.1371/journal.pone.0085701	0	0	0	0	3	3	3	0	0	0	0	0	0	67	74	77	74
10.1371/journal.pone.0086180	0	0	0	1	0	1	1	0	0	0	0	0	0	12	15	15	15
10.1371/journal.pone.0086186	0	0	NULL	0	0	0	0	0	0	0	4	0	NULL	20	20	20	NULL
10.1371/journal.pone.0086190	0	0	0	0	1	5	3	0	0	0	0	0	0	6	6	6	6
10.1371/journal.pone.0086214	0	0	NULL	0	0	0	0	0	0	0	0	0	NULL	20	19	19	NULL
10.1371/journal.pone.0086230	0	0	NULL	0	0	0	0	0	0	0	0	0	NULL	7	8	8	NULL
10.1371/journal.pone.0086245	0	0	0	1	0	1	1	0	0	0	0	0	0	19	19	19	19
10.1371/journal.pone.0086248	0	0	NULL	0	0	0	0	0	0	0	0	0	NULL	24	24	24	NULL
10.1371/journal.pone.0086257	0	0	0	4	16	10	3	0	0	0	0	0	0	9	9	9	9
10.1371/journal.pone.0086262	0	0	NULL	0	0	0	0	0	0	0	0	0	NULL	56	43	46	NULL
10.1371/journal.pone.0086273	0	0	0	0	2	2	2	0	0	0	0	0	0	47	46	46	46
10.1371/journal.pone.0086278	2	1	NULL	0	1	0	0	0	0	0	0	0	NULL	26	31	35	NULL
10.1371/journal.pone.0086279	0	0	NULL	0	0	0	0	0	0	0	0	0	NULL	6	6	6	NULL
10.1371/journal.pone.0086283	0	0	0	0	1	1	1	0	0	0	0	0	0	30	28	30	28
10.1371/journal.pone.0086292	0	0	NULL	0	0	0	0	0	0	0	0	0	NULL	14	15	15	NULL
10.1371/journal.pone.0086297	0	0	0	0	1	1	1	0	0	0	0	0	0	38	37	37	37
10.1371/journal.pone.0086303	0	0	NULL	0	0	0	0	0	0	0	0	0	NULL	27	31	34	NULL
10.1371/journal.pone.0086310	0	0	NULL	0	0	0	0	0	0	0	0	0	NULL	17	16	16	NULL
10.1371/journal.pone.0086322	0	0	1	0	0	0	0	0	0	0	0	0	0	55	59	64	59
10.1371/journal.pone.0086325	0	0	0	0	2	2	2	0	0	0	0	0	0	34	35	35	35
10.1371/journal.pone.0086328	0	0	0	0	5	6	4	0	0	0	0	0	0	10	11	12	11
10.1371/journal.pone.0086329	0	0	NULL	0	0	0	0	0	0	0	0	0	NULL	29	34	33	NULL
10.1371/journal.pone.0086330	0	0	NULL	0	0	0	0	0	0	0	0	0	NULL	6	7	7	NULL
10.1371/journal.pone.0086342	0	0	NULL	0	0	0	0	0	0	0	0	0	NULL	15	14	15	NULL
10.1371/journal.pone.0085706	0	0	NULL	0	0	0	0	0	0	0	0	0	NULL	30	5	5	NULL
10.1371/journal.pone.0085711	0	0	NULL	0	0	0	0	0	0	0	0	0	NULL	3	3	3	NULL
10.1371/journal.pone.0085723	4	0	0	6	6	6	6	0	0	0	0	0	0	24	24	29	24
10.1371/journal.pone.0085729	0	0	NULL	0	0	0	0	0	0	0	0	0	NULL	18	21	21	NULL
10.1371/journal.pone.0085758	0	0	0	0	7	9	8	0	0	0	0	0	0	23	25	26	25
10.1371/journal.pone.0085766	0	0	NULL	0	0	0	0	0	0	0	0	0	NULL	11	10	10	NULL
10.1371/journal.pone.0085775	0	0	0	0	0	1	1	0	0	0	0	0	0	20	21	21	21
10.1371/journal.pone.0085777	44	0	0	29	9	25	21	1	1	1	0	2	0	254	285	272	285
10.1371/journal.pone.0085778	0	0	0	1	1	1	1	0	0	0	0	0	0	4	4	4	4
10.1371/journal.pone.0085780	0	0	0	1	0	1	1	0	0	0	0	0	0	102	103	105	103
10.1371/journal.pone.0085784	0	0	0	1	0	1	1	0	0	0	0	0	0	16	14	14	14
10.1371/journal.pone.0085809	0	0	NULL	0	0	0	0	0	0	0	0	0	NULL	14	17	17	NULL
10.1371/journal.pone.0085829	0	0	NULL	0	0	0	0	0	0	0	0	0	NULL	25	25	26	NULL
10.1371/journal.pone.0085834	0	0	NULL	0	0	0	0	0	0	0	0	0	NULL	47	45	45	NULL
10.1371/journal.pone.0085835	0	0	NULL	0	0	0	0	0	0	0	0	0	NULL	64	57	59	NULL
10.1371/journal.pone.0085839	0	0	0	0	0	1	1	0	0	0	0	0	0	18	19	19	19
10.1371/journal.pone.0085846	2	1	0	4	15	19	17	0	0	0	0	0	0	29	31	32	31
10.1371/journal.pone.0085849	0	0	0	0	0	2	2	0	0	0	0	0	0	8	9	10	9
10.1371/journal.pone.0085852	0	0	NULL	0	0	0	0	0	0	0	0	0	NULL	12	11	11	NULL
10.1371/journal.pone.0085873	0	0	NULL	0	0	0	0	0	0	0	0	0	NULL	18	20	20	NULL
10.1371/journal.pone.0085874	0	0	NULL	0	0	0	0	0	0	0	0	0	NULL	9	4	4	NULL
10.1371/journal.pone.0085891	2	1	NULL	0	0	0	0	0	0	0	0	0	NULL	10	11	11	NULL
10.1371/journal.pone.0085895	0	0	NULL	0	0	0	0	0	0	0	0	0	NULL	48	46	51	NULL
10.1371/journal.pone.0086822	0	0	0	0	0	4	4	0	0	0	0	0	0	32	22	22	22
10.1371/journal.pone.0086827	0	0	0	1	6	7	7	0	0	0	0	0	0	52	53	52	53
10.1371/journal.pone.0086830	0	0	NULL	0	0	0	0	0	0	0	0	0	NULL	16	18	20	NULL
10.1371/journal.pone.0086834	0	0	NULL	0	0	0	0	0	0	0	0	0	NULL	18	16	17	NULL
10.1371/journal.pone.0086837	0	0	0	0	0	1	1	0	0	0	0	0	0	8	8	8	8
10.1371/journal.pone.0086842	0	0	0	0	12	8	7	0	0	0	0	0	0	27	27	28	27
10.1371/journal.pone.0086843	0	0	0	3	3	5	3	0	0	0	0	0	0	6	5	5	5
10.1371/journal.pone.0086882	0	0	0	0	0	0	0	0	0	0	0	0	0	35	28	29	28
10.1371/journal.pone.0086888	0	0	1	0	0	0	0	0	0	0	0	0	0	8	9	10	9
10.1371/journal.pone.0086890	0	0	NULL	0	0	0	0	0	0	0	0	0	NULL	13	12	13	NULL
10.1371/journal.pone.0086895	0	0	0	0	0	1	1	0	0	0	0	0	0	54	57	58	57
10.1371/journal.pone.0086898	0	0	0	0	1	1	1	0	0	0	0	0	0	10	11	11	11
10.1371/journal.pone.0086899	0	0	0	0	0	3	3	0	0	0	0	0	0	26	25	25	25
10.1371/journal.pone.0086909	0	0	NULL	0	0	0	0	0	0	0	0	0	NULL	19	22	24	NULL
10.1371/journal.pone.0086912	0	0	0	0	0	1	1	0	0	0	0	0	0	29	30	30	30
10.1371/journal.pone.0086925	0	0	2	40	34	41	36	0	0	0	0	0	0	92	91	97	91
10.1371/journal.pone.0086932	0	0	0	0	1	1	1	0	0	0	0	0	0	18	19	19	19
10.1371/journal.pone.0086938	0	0	NULL	0	0	0	0	0	0	0	0	0	NULL	29	33	35	NULL
10.1371/journal.pone.0086956	0	0	0	0	0	1	1	0	0	0	0	0	0	16	15	15	15
10.1371/journal.pone.0086965	0	0	0	0	1	6	6	0	0	0	0	0	0	19	16	16	16
10.1371/journal.pone.0086974	0	0	0	0	2	2	2	0	0	0	0	0	0	22	22	23	8
10.1371/journal.pone.0086997	0	0	NULL	0	0	0	0	0	0	0	0	0	NULL	8	8	8	NULL
10.1371/journal.pone.0085982	0	0	0	1	0	2	2	0	0	0	0	0	0	12	13	14	13
10.1371/journal.pone.0085996	0	0	NULL	0	0	0	0	0	0	0	0	0	NULL	17	20	21	NULL
10.1371/journal.pone.0086023	2	0	1	1	13	24	21	0	0	0	0	0	0	75	73	78	73
10.1371/journal.pone.0086025	0	0	NULL	0	0	0	0	0	0	0	0	0	NULL	19	18	22	NULL
10.1371/journal.pone.0086037	0	0	NULL	0	0	0	0	0	0	0	0	0	NULL	8	8	8	NULL
10.1371/journal.pone.0086042	0	0	0	0	2	4	4	0	0	0	0	0	0	45	47	52	47
10.1371/journal.pone.0086049	0	0	NULL	0	0	0	0	0	0	0	0	0	NULL	30	29	29	NULL
10.1371/journal.pone.0086052	0	0	0	1	0	1	1	0	0	0	0	0	0	5	5	5	5
10.1371/journal.pone.0086053	0	0	0	0	0	0	0	0	0	0	0	0	0	18	15	15	15
10.1371/journal.pone.0086061	0	0	NULL	0	0	0	0	0	0	0	0	0	NULL	12	3	3	NULL
10.1371/journal.pone.0086064	0	0	NULL	0	0	0	0	0	0	0	0	0	NULL	14	14	14	NULL
10.1371/journal.pone.0086075	0	0	0	0	0	1	1	0	0	0	0	0	0	14	14	14	14
10.1371/journal.pone.0086076	2	0	NULL	0	0	0	0	0	0	0	0	0	NULL	8	8	9	NULL
10.1371/journal.pone.0086081	2	0	2	2	4	11	9	0	0	0	0	0	0	31	31	31	31
10.1371/journal.pone.0086095	0	0	NULL	0	0	0	0	0	0	0	0	0	NULL	3	3	3	NULL
10.1371/journal.pone.0086115	0	0	NULL	0	0	0	0	0	0	0	0	0	NULL	23	23	23	NULL
10.1371/journal.pone.0086117	1	0	0	1	7	10	7	0	0	0	0	0	0	46	44	48	44
10.1371/journal.pone.0086123	0	0	1	0	0	0	0	0	0	0	0	0	0	12	10	11	10
10.1371/journal.pone.0086130	4	0	1	0	1	1	1	0	0	0	0	0	0	38	38	40	38
10.1371/journal.pone.0086131	0	0	5	0	0	1	1	0	0	0	0	0	0	10	10	11	10
10.1371/journal.pone.0086135	0	0	NULL	0	0	0	0	0	0	0	0	0	NULL	10	12	12	NULL
10.1371/journal.pone.0086145	0	0	NULL	0	0	0	0	0	0	0	0	0	NULL	8	9	9	NULL
10.1371/journal.pone.0086998	0	0	0	0	0	5	3	0	0	0	0	0	0	15	16	16	16
10.1371/journal.pone.0087001	0	0	NULL	0	0	0	0	0	0	0	0	0	NULL	3	2	2	NULL
10.1371/journal.pone.0087019	0	0	0	0	1	1	1	0	0	0	0	0	0	8	5	5	5
10.1371/journal.pone.0087026	0	0	0	1	0	1	1	1	1	0	0	0	0	14	16	16	16
10.1371/journal.pone.0087038	0	0	NULL	0	0	0	0	0	0	0	0	0	NULL	6	8	9	NULL
10.1371/journal.pone.0087047	0	0	NULL	0	0	0	0	0	0	0	0	0	NULL	18	20	20	NULL
10.1371/journal.pone.0087049	0	0	0	0	0	1	1	0	0	0	0	0	0	14	15	15	15
10.1371/journal.pone.0087050	0	0	2	0	0	0	0	0	0	0	0	0	0	14	15	14	15
10.1371/journal.pone.0087059	0	0	NULL	0	0	0	0	0	0	0	0	0	NULL	15	10	10	NULL
10.1371/journal.pone.0087063	0	0	0	0	0	1	1	0	0	0	0	0	0	10	10	10	10
10.1371/journal.pone.0087069	0	0	NULL	0	0	0	0	0	0	0	0	0	NULL	12	8	8	NULL
10.1371/journal.pone.0087072	2	1	0	4	0	5	5	0	0	0	0	0	0	69	74	80	74
10.1371/journal.pone.0087084	0	0	NULL	0	0	0	0	0	0	0	0	0	NULL	31	30	30	NULL
10.1371/journal.pone.0087095	18	0	0	3	0	6	6	0	0	0	0	0	0	40	32	34	32
10.1371/journal.pone.0087096	1	0	0	0	0	0	0	0	0	1	1	0	1	17	16	14	16
10.1371/journal.pone.0087112	0	0	0	0	0	1	1	0	0	0	0	0	0	20	21	22	21
10.1371/journal.pone.0087124	0	0	NULL	0	0	0	0	0	0	0	0	0	NULL	10	10	10	NULL
10.1371/journal.pone.0087126	0	0	0	0	18	18	18	0	0	0	0	0	0	40	37	39	37
10.1371/journal.pone.0087149	0	0	0	0	1	1	1	0	0	0	0	0	0	23	22	26	22
10.1371/journal.pone.0087152	0	0	0	0	0	3	3	0	0	0	0	0	0	32	38	41	38
10.1371/journal.pone.0087171	0	0	NULL	0	0	0	0	0	0	0	0	0	NULL	20	20	20	NULL
10.1371/journal.pone.0087190	0	0	NULL	0	0	0	0	0	0	0	0	0	NULL	42	44	46	NULL
10.1371/journal.pone.0086346	0	0	NULL	0	0	0	0	0	0	0	0	0	NULL	22	26	29	NULL
10.1371/journal.pone.0086347	0	0	0	1	0	1	1	0	0	0	0	0	0	26	24	25	24
10.1371/journal.pone.0086350	0	0	NULL	0	0	0	0	0	0	0	0	0	NULL	6	7	7	NULL
10.1371/journal.pone.0086351	0	0	NULL	0	0	0	0	0	0	0	0	0	NULL	6	6	6	NULL
10.1371/journal.pone.0086353	0	0	0	2	1	1	1	0	0	0	0	0	0	22	25	26	25
10.1371/journal.pone.0086372	0	0	0	0	3	3	2	0	0	0	4	0	0	99	86	90	86
10.1371/journal.pone.0086381	0	0	1	0	4	5	3	0	0	0	0	0	0	26	30	31	30
10.1371/journal.pone.0086385	0	0	1	0	27	26	23	0	0	0	0	1	1	10	11	10	15
10.1371/journal.pone.0086390	0	0	NULL	0	0	0	0	0	0	0	0	0	NULL	12	17	13	NULL
10.1371/journal.pone.0086392	0	0	0	0	2	2	2	0	0	1	1	0	1	15	14	16	14
10.1371/journal.pone.0086399	0	0	0	0	0	1	1	0	0	0	0	0	0	38	38	38	38
10.1371/journal.pone.0086407	0	0	0	0	0	1	1	0	0	0	0	0	0	30	29	33	29
10.1371/journal.pone.0086409	93	93	1	1	1	1	1	0	0	1	1	4	1	83	77	78	77
10.1371/journal.pone.0086419	2	0	NULL	0	0	0	0	0	0	0	0	0	NULL	16	16	18	NULL
10.1371/journal.pone.0086429	0	0	0	1	0	1	1	0	0	0	0	0	0	25	25	27	25
10.1371/journal.pone.0086439	0	0	0	0	1	1	1	0	0	0	0	0	0	22	21	21	21
10.1371/journal.pone.0086441	0	0	NULL	0	0	0	0	0	0	0	0	0	NULL	28	27	27	NULL
10.1371/journal.pone.0086443	0	0	NULL	0	0	0	0	0	0	0	0	0	NULL	21	20	22	NULL
10.1371/journal.pone.0086447	0	0	NULL	0	0	0	0	0	0	0	0	0	NULL	17	18	19	NULL
10.1371/journal.pone.0086462	2	1	0	0	2	6	4	0	0	0	0	0	0	28	28	27	28
10.1371/journal.pone.0086469	1	0	0	2	0	1	1	0	0	0	0	0	0	48	51	53	51
10.1371/journal.pone.0086483	0	0	1	1	3	4	4	0	0	0	0	0	0	17	17	17	17
10.1371/journal.pone.0084715	8	4	0	3	4	7	6	0	0	0	0	0	0	13	11	11	11
10.1371/journal.pone.0084719	4	0	1	0	0	1	1	0	0	0	0	0	0	21	24	24	24
10.1371/journal.pone.0084727	0	0	0	6	23	36	33	0	0	0	0	0	0	77	78	85	78
10.1371/journal.pone.0084747	0	0	0	0	3	4	4	0	0	0	0	0	0	46	43	43	43
10.1371/journal.pone.0084760	96	0	3	5	4	5	4	0	0	0	0	0	0	43	42	43	42
10.1371/journal.pone.0084774	0	0	0	0	1	1	1	0	0	0	0	0	0	26	26	26	26
10.1371/journal.pone.0084780	0	0	NULL	0	0	0	0	0	0	0	0	0	NULL	11	14	14	NULL
10.1371/journal.pone.0084782	0	0	0	1	4	33	33	0	0	0	0	0	0	30	30	31	30
10.1371/journal.pone.0084818	0	0	NULL	0	0	0	0	0	0	0	0	0	NULL	20	19	20	NULL
10.1371/journal.pone.0084833	0	0	NULL	0	0	0	0	0	0	0	0	0	NULL	10	10	10	NULL
10.1371/journal.pone.0084842	0	0	NULL	0	0	0	0	0	0	0	0	0	NULL	9	8	8	NULL
10.1371/journal.pone.0084858	0	0	NULL	0	0	0	0	0	0	0	0	0	NULL	47	46	46	NULL
10.1371/journal.pone.0084882	0	0	1	0	1	13	10	0	0	0	0	0	0	19	21	22	21
10.1371/journal.pone.0084886	0	0	0	0	0	1	1	0	0	0	0	0	0	17	17	17	17
10.1371/journal.pone.0084893	0	0	NULL	0	0	0	0	0	0	0	0	0	NULL	10	10	10	NULL
10.1371/journal.pone.0084896	1380	688	34	179	334	439	414	0	0	0	0	0	0	116	114	122	114
10.1371/journal.pone.0084899	0	0	0	1	0	1	1	0	0	0	0	0	0	20	24	24	24
10.1371/journal.pone.0084924	0	0	0	0	0	0	0	0	0	0	0	0	0	18	20	20	20
10.1371/journal.pone.0084925	0	0	NULL	0	0	0	0	0	0	0	0	0	NULL	20	19	19	NULL
10.1371/journal.pone.0084940	0	0	0	0	1	2	2	0	0	0	0	0	0	11	12	13	12
10.1371/journal.pone.0084961	0	0	0	6	7	10	10	0	0	0	0	0	0	28	26	27	26
10.1371/journal.pone.0084972	0	0	NULL	0	0	0	0	0	0	0	0	0	NULL	13	14	15	NULL
10.1371/annotation/fb09c61a-a793-4cab-b218-2bfdf384bd96	0	0	NULL	0	0	0	0	0	0	0	0	0	NULL	4	NULL	0	NULL
10.1371/journal.pone.0061567	0	0	NULL	0	0	0	0	0	0	0	0	0	NULL	9	8	8	NULL
10.1371/journal.pone.0077974	0	0	0	0	0	0	0	0	0	0	0	0	0	37	36	40	36
10.1371/journal.pone.0079682	0	0	NULL	0	0	0	0	0	0	0	0	0	NULL	19	16	16	NULL
10.1371/journal.pone.0080169	8	4	0	3	1	6	5	0	0	0	0	0	0	61	53	55	53
10.1371/journal.pone.0080274	0	0	0	0	1	2	2	0	0	0	0	0	0	24	25	25	25
10.1371/journal.pone.0080577	0	0	0	0	4	10	6	0	0	0	0	0	0	21	20	19	19
10.1371/journal.pone.0080680	0	0	0	0	3	8	8	0	0	0	0	0	0	27	27	29	27
10.1371/journal.pone.0080936	0	0	2	0	80	97	72	0	0	0	0	0	0	24	26	29	26
10.1371/journal.pone.0081604	0	0	0	0	0	2	2	0	0	0	0	0	0	57	59	59	59
10.1371/journal.pone.0081730	0	0	0	0	1	1	1	0	0	0	0	0	0	21	19	19	19
10.1371/journal.pone.0082197	1	0	0	0	4	3	3	0	0	0	0	0	0	20	18	19	18
10.1371/journal.pone.0082311	0	0	NULL	0	0	0	0	0	0	0	0	0	NULL	31	29	29	NULL
10.1371/journal.pone.0082315	0	0	0	1	1	1	1	0	0	0	0	0	0	3	3	3	3
10.1371/journal.pone.0082372	3	0	0	0	0	2	2	0	0	0	0	0	0	35	34	35	34
10.1371/journal.pone.0082452	1	0	1	7	14	30	22	0	0	0	0	0	0	19	19	19	19
10.1371/journal.pone.0082490	8	1	2	0	18	18	18	0	0	0	0	0	0	94	89	92	89
10.1371/journal.pone.0082624	0	0	0	0	5	5	5	0	0	0	0	0	0	42	39	40	39
10.1371/journal.pone.0082721	2	1	2	0	5	10	9	0	0	0	0	0	0	8	8	9	8
10.1371/journal.pone.0082898	0	0	2	118	108	123	116	0	0	0	1	0	0	250	254	274	254
10.1371/journal.pone.0083098	0	0	NULL	0	0	0	0	0	0	0	0	0	NULL	10	10	12	NULL
10.1371/journal.pone.0083126	2	1	NULL	0	0	0	0	0	0	0	0	0	NULL	15	15	15	NULL
10.1371/annotation/200805c7-c33f-415b-8f22-57d5e0455b5d	0	0	NULL	0	0	0	0	0	0	0	0	0	NULL	0	NULL	0	NULL
10.1371/annotation/844c2e7b-2f5f-4982-85d2-b82debdeffb1	0	0	NULL	0	0	0	0	0	0	0	0	0	NULL	0	NULL	0	NULL
10.1371/annotation/f0ad0323-84d6-4c21-be15-d07aed1993a1	0	0	NULL	0	0	0	0	0	0	0	0	0	NULL	0	NULL	0	NULL
10.1371/journal.pone.0070796	0	0	0	0	0	1	1	0	0	0	0	0	0	6	6	6	6
10.1371/journal.pone.0071160	2	1	1	0	6	7	7	0	0	3	7	4	3	11	13	13	13
10.1371/journal.pone.0072181	0	0	NULL	0	0	0	0	0	0	0	0	0	NULL	3	3	4	NULL
10.1371/journal.pone.0077506	0	0	0	0	2	7	6	0	0	0	0	0	0	14	12	13	12
10.1371/journal.pone.0077792	0	0	NULL	0	0	0	0	0	0	0	0	0	NULL	17	15	15	NULL
10.1371/journal.pone.0078069	0	0	NULL	0	0	0	0	0	0	0	0	0	NULL	24	25	26	NULL
10.1371/journal.pone.0078888	0	0	NULL	0	0	0	0	0	0	0	0	0	NULL	8	8	8	NULL
10.1371/journal.pone.0079575	0	0	0	0	0	4	4	0	0	0	0	0	0	21	22	24	22
10.1371/journal.pone.0079578	0	0	0	0	2	4	4	0	0	0	0	0	0	30	28	28	28
10.1371/journal.pone.0080069	0	0	0	0	0	1	1	0	0	0	0	0	0	9	7	8	7
10.1371/journal.pone.0080949	0	0	0	0	0	3	3	0	0	0	0	0	0	5	6	6	6
10.1371/journal.pone.0080973	0	0	0	0	1	2	2	0	0	0	0	0	0	68	43	46	43
10.1371/journal.pone.0081344	0	0	0	0	0	1	1	0	0	0	0	0	0	24	14	14	14
10.1371/journal.pone.0081552	1	0	0	1	1	2	2	0	0	0	4	0	0	17	19	21	19
10.1371/journal.pone.0081813	0	0	0	0	2	2	2	0	0	0	0	0	0	41	40	41	40
10.1371/journal.pone.0081868	0	0	0	0	2	3	3	0	0	0	0	0	0	31	32	34	32
10.1371/journal.pone.0082004	2	0	0	0	1	4	4	0	0	0	0	0	0	30	25	27	25
10.1371/journal.pone.0082088	0	0	0	0	0	1	1	0	0	0	0	0	0	35	34	32	34
10.1371/journal.pone.0087195	0	0	NULL	0	0	0	0	0	0	0	0	0	NULL	4	3	3	NULL
10.1371/journal.pone.0087199	0	0	0	0	5	5	5	0	0	0	0	0	0	24	25	25	25
10.1371/journal.pone.0087218	0	0	NULL	0	0	0	0	0	0	0	0	0	NULL	72	60	61	NULL
10.1371/journal.pone.0087220	0	0	0	2	0	4	4	0	0	0	0	0	0	21	20	22	20
10.1371/journal.pone.0087223	0	0	NULL	0	0	0	0	0	0	0	0	0	NULL	10	10	10	NULL
10.1371/journal.pone.0087233	0	0	NULL	0	0	0	0	0	0	0	0	0	NULL	31	18	19	NULL
10.1371/journal.pone.0087236	0	0	3	99	106	102	80	0	0	0	5	6	0	38	42	42	42
10.1371/journal.pone.0087241	0	0	NULL	0	0	0	0	0	0	0	0	0	NULL	37	30	32	NULL
10.1371/journal.pone.0087242	0	0	NULL	0	0	0	0	0	0	0	0	0	NULL	14	14	16	NULL
10.1371/journal.pone.0087255	0	0	NULL	0	0	0	0	0	0	0	0	0	NULL	30	37	34	NULL
10.1371/journal.pone.0087257	4	0	0	10	6	9	7	0	0	0	0	0	0	36	37	38	37
10.1371/journal.pone.0087259	0	0	NULL	0	0	0	0	0	0	0	0	0	NULL	5	5	5	NULL
10.1371/journal.pone.0087265	0	0	0	0	2	5	5	0	0	0	0	0	0	12	11	12	11
10.1371/journal.pone.0087271	0	0	1	0	1	1	1	0	0	0	0	0	0	34	35	35	35
10.1371/journal.pone.0087310	0	0	NULL	0	0	0	0	0	0	0	0	0	NULL	10	7	7	NULL
10.1371/journal.pone.0087313	0	0	NULL	0	0	0	0	0	0	0	0	0	NULL	21	22	24	NULL
10.1371/journal.pone.0087315	0	0	NULL	0	0	0	0	0	0	0	0	0	NULL	64	62	64	NULL
10.1371/journal.pone.0087326	0	0	NULL	0	0	0	0	0	0	0	0	0	NULL	43	45	47	NULL
10.1371/journal.pone.0087338	0	0	0	0	1	2	2	0	0	0	0	0	0	41	39	39	39
10.1371/journal.pone.0087344	0	0	NULL	0	0	0	0	0	0	0	0	0	NULL	10	10	10	NULL
10.1371/journal.pone.0087347	0	0	0	5	5	22	17	0	0	1	2	0	1	118	115	116	112
10.1371/journal.pone.0087361	0	0	0	0	7	2	2	0	0	0	0	0	0	77	74	81	74
10.1371/journal.pone.0087366	4	0	0	4	4	6	6	0	0	0	0	0	0	47	49	49	49
10.1371/journal.pone.0086488	0	0	1	0	1	2	2	0	0	0	0	0	0	45	43	44	43
10.1371/journal.pone.0086494	2	1	4	1	10	13	11	0	0	0	0	0	0	116	138	143	138
10.1371/journal.pone.0086510	2	1	2	0	0	2	2	0	0	0	0	0	0	91	92	93	92
10.1371/journal.pone.0086514	0	0	0	0	0	1	1	0	0	0	0	0	0	23	24	25	24
10.1371/journal.pone.0086518	0	0	NULL	0	0	0	0	0	0	0	0	0	NULL	13	13	13	NULL
10.1371/journal.pone.0086522	0	0	NULL	0	0	0	0	0	0	0	0	0	NULL	10	10	11	NULL
10.1371/journal.pone.0086529	0	0	NULL	1	0	0	0	0	0	0	0	0	NULL	16	17	18	NULL
10.1371/journal.pone.0086537	0	0	0	0	0	2	2	0	0	0	0	0	0	7	7	7	7
10.1371/journal.pone.0086545	0	0	0	0	0	1	1	0	0	0	0	0	0	15	19	19	19
10.1371/journal.pone.0086548	0	0	NULL	0	0	0	0	0	0	0	0	0	NULL	19	21	23	NULL
10.1371/journal.pone.0086549	0	0	0	0	0	1	1	0	0	0	0	0	0	15	13	13	13
10.1371/journal.pone.0086552	2	2	0	0	19	20	20	0	0	0	0	0	0	25	22	24	22
10.1371/journal.pone.0086562	0	0	NULL	0	0	0	0	0	0	0	0	0	NULL	25	27	30	NULL
10.1371/journal.pone.0086579	0	0	NULL	0	0	0	0	0	0	0	0	0	NULL	3	4	4	NULL
10.1371/journal.pone.0086580	0	0	0	0	0	2	2	0	0	0	0	0	0	80	82	85	82
10.1371/journal.pone.0086585	0	0	NULL	0	0	0	0	0	0	0	0	0	NULL	39	42	44	NULL
10.1371/journal.pone.0086588	2	2	0	0	31	29	24	0	0	0	0	0	0	75	76	77	76
10.1371/journal.pone.0086595	1	0	0	1	0	3	2	0	0	0	1	2	0	25	26	28	26
10.1371/journal.pone.0086598	4	2	1	2	8	8	8	0	0	0	0	0	0	74	73	77	73
10.1371/journal.pone.0086602	0	0	0	0	0	0	0	0	0	0	0	0	0	40	41	44	41
10.1371/journal.pone.0086609	0	0	NULL	0	0	0	0	0	0	0	0	0	NULL	21	20	23	NULL
10.1371/journal.pone.0086611	0	0	NULL	0	0	0	0	0	0	0	0	0	NULL	16	18	19	NULL
10.1371/journal.pone.0087372	0	0	0	0	3	4	4	0	0	0	0	0	0	42	43	44	43
10.1371/journal.pone.0087374	0	0	NULL	0	0	0	0	0	0	0	0	0	NULL	38	39	41	NULL
10.1371/journal.pone.0087389	0	0	0	5	52	59	55	0	0	0	1	24	0	84	85	92	85
10.1371/journal.pone.0087408	0	0	0	0	1	1	1	0	0	0	0	0	0	17	16	16	16
10.1371/journal.pone.0087409	0	0	NULL	0	0	0	0	0	0	0	0	0	NULL	36	35	36	NULL
10.1371/journal.pone.0087410	0	0	0	0	0	1	1	0	0	0	0	0	0	10	7	7	7
10.1371/journal.pone.0087413	0	0	NULL	0	0	0	0	0	0	0	0	0	NULL	28	28	28	NULL
10.1371/journal.pone.0087428	1	0	0	0	3	6	6	0	0	0	0	0	0	31	30	29	30
10.1371/journal.pone.0087430	0	0	0	2	0	3	2	0	0	0	0	0	0	37	36	37	36
10.1371/journal.pone.0087450	0	0	NULL	0	0	0	0	0	0	0	0	0	NULL	8	8	8	NULL
10.1371/journal.pone.0087453	0	0	NULL	0	0	0	0	0	0	0	1	0	NULL	13	12	13	NULL
10.1371/journal.pone.0087463	0	0	NULL	0	0	0	0	0	0	0	0	0	NULL	11	10	12	NULL
10.1371/journal.pone.0087470	3	0	0	1	3	3	3	0	0	0	0	0	0	47	47	48	47
10.1371/journal.pone.0087480	4	0	NULL	0	0	0	0	0	0	0	0	0	NULL	20	17	19	NULL
10.1371/journal.pone.0087481	0	0	0	0	0	1	1	0	0	0	0	0	0	16	18	19	18
10.1371/journal.pone.0087487	24	5	6	8	10	15	9	0	0	0	0	1	0	39	39	39	39
10.1371/journal.pone.0087488	0	0	0	0	0	3	3	0	0	0	0	0	0	24	23	22	23
10.1371/journal.pone.0087492	0	0	0	0	1	1	1	0	0	0	0	0	0	4	4	4	4
10.1371/journal.pone.0087505	0	0	NULL	0	0	0	0	0	0	0	0	0	NULL	4	3	3	NULL
10.1371/journal.pone.0087513	0	0	0	0	3	4	4	0	0	0	0	0	0	27	27	27	27
10.1371/journal.pone.0087516	0	0	0	0	2	2	2	0	0	0	0	0	0	23	28	29	28
10.1371/journal.pone.0087519	2	1	NULL	0	0	0	0	0	0	0	0	0	NULL	10	13	14	NULL
10.1371/journal.pone.0085900	0	0	0	14	1	14	14	0	0	0	0	0	0	21	21	21	21
10.1371/journal.pone.0085904	0	0	0	0	3	3	3	0	0	0	0	0	0	62	62	66	61
10.1371/journal.pone.0085907	0	0	0	0	0	3	2	0	0	0	0	0	0	23	20	21	20
10.1371/journal.pone.0085926	0	0	0	0	0	1	1	0	0	0	0	0	0	16	19	18	19
10.1371/journal.pone.0085931	0	0	0	1	0	4	4	0	0	0	0	0	0	13	14	14	14
10.1371/journal.pone.0085945	1	0	0	0	2	2	2	0	0	0	0	0	0	17	19	18	19
10.1371/journal.pone.0085946	0	0	0	1	0	3	2	0	0	0	0	0	0	2	3	3	3
10.1371/journal.pone.0085957	0	0	0	0	0	1	1	0	0	0	2	0	0	12	11	11	11
10.1371/journal.pone.0085958	0	0	NULL	0	0	0	0	0	0	0	0	0	NULL	12	12	12	NULL
10.1371/journal.pone.0085962	0	0	0	0	0	0	0	0	0	0	0	0	0	37	36	36	36
10.1371/journal.pone.0085971	0	0	1	2	2	2	2	0	0	0	0	0	0	14	14	14	14
10.1371/journal.pone.0085998	0	0	0	0	7	7	6	0	0	0	0	0	0	36	42	42	42
10.1371/journal.pone.0086010	0	0	NULL	0	0	0	0	0	0	0	0	0	NULL	9	9	10	NULL
10.1371/journal.pone.0086019	0	0	NULL	0	0	0	0	0	0	0	0	0	NULL	8	8	9	NULL
10.1371/journal.pone.0086035	0	0	NULL	0	0	0	0	0	0	0	0	0	NULL	130	5	5	NULL
10.1371/journal.pone.0086036	0	0	0	0	1	2	2	0	0	0	0	0	0	14	13	14	13
10.1371/journal.pone.0086065	0	0	0	2	3	4	4	0	0	0	0	0	0	42	38	43	38
10.1371/journal.pone.0086077	0	0	NULL	0	0	0	0	0	0	0	0	0	NULL	4	4	4	NULL
10.1371/journal.pone.0086079	0	0	NULL	0	0	0	0	0	0	0	0	0	NULL	26	25	28	NULL
10.1371/journal.pone.0086082	0	0	NULL	0	0	0	0	0	0	0	0	0	NULL	6	5	5	NULL
10.1371/journal.pone.0086084	0	0	NULL	0	0	0	0	0	0	0	0	0	NULL	13	12	12	NULL
10.1371/journal.pone.0086098	0	0	0	0	1	1	1	0	0	0	0	0	0	19	18	18	18
10.1371/journal.pone.0086155	0	0	0	0	0	4	4	0	0	0	0	0	0	11	9	11	9
10.1371/journal.pone.0086157	0	0	0	0	1	1	1	0	0	0	0	0	0	17	16	18	16
10.1371/journal.pone.0086165	0	0	1	1	10	12	11	1	1	0	1	0	0	32	30	33	30
10.1371/journal.pone.0086170	54	16	3	2	36	44	37	0	0	0	0	0	0	45	41	43	41
10.1371/journal.pone.0086179	0	0	0	0	3	3	3	0	0	0	0	0	0	71	65	69	65
10.1371/journal.pone.0086183	0	0	1	0	0	1	1	0	0	0	0	0	0	36	35	37	35
10.1371/journal.pone.0086184	0	0	0	0	0	0	0	0	0	1	1	54	1	63	71	75	71
10.1371/journal.pone.0086185	0	0	0	0	2	1	1	0	0	1	1	2	1	13	12	12	12
10.1371/journal.pone.0086189	0	0	1	0	1	2	2	0	0	0	0	0	0	22	27	28	27
10.1371/journal.pone.0086191	4	0	0	33	30	80	75	0	0	0	0	0	0	98	96	106	96
10.1371/journal.pone.0086210	0	0	NULL	0	0	0	0	0	0	0	0	0	NULL	12	11	11	NULL
10.1371/journal.pone.0086220	268	118	0	1	3	4	4	0	0	0	0	0	0	24	24	24	24
10.1371/journal.pone.0086238	0	0	NULL	0	0	0	0	0	0	0	0	0	NULL	17	17	17	NULL
10.1371/journal.pone.0086251	20	10	4	5	28	48	47	0	0	0	1	5	0	78	79	81	79
10.1371/journal.pone.0086289	2	1	1	0	7	2	2	0	0	1	1	0	1	64	56	56	56
10.1371/journal.pone.0086298	0	0	NULL	0	0	0	0	0	0	0	0	0	NULL	46	41	44	NULL
10.1371/journal.pone.0086302	3	0	0	1	15	25	23	0	0	0	0	0	0	30	32	33	32
10.1371/journal.pone.0086304	0	0	NULL	0	0	0	0	0	0	0	0	0	NULL	6	6	6	NULL
10.1371/journal.pone.0086319	0	0	NULL	0	0	0	0	0	0	0	0	0	NULL	2	2	2	NULL
10.1371/journal.pone.0086336	0	0	0	3	0	3	1	0	0	0	0	0	0	8	8	8	8
10.1371/journal.pone.0086338	2	0	0	0	0	1	1	0	0	0	0	0	0	18	18	18	18
10.1371/journal.pone.0086349	0	0	NULL	0	0	0	0	0	0	0	0	0	NULL	11	10	11	NULL
10.1371/journal.pone.0087521	0	0	0	0	1	1	1	0	0	0	0	0	0	50	42	43	42
10.1371/journal.pone.0087532	0	0	0	0	1	1	1	0	0	0	0	0	0	51	34	34	34
10.1371/journal.pone.0087553	0	0	0	0	26	25	22	0	0	4	5	6	4	27	29	31	29
10.1371/journal.pone.0087557	0	0	0	0	0	2	2	0	0	0	0	0	0	19	21	19	21
10.1371/journal.pone.0087564	0	0	0	0	5	13	9	0	0	0	0	0	0	22	23	28	23
10.1371/journal.pone.0087576	0	0	0	3	3	6	5	0	0	0	0	0	0	49	54	54	54
10.1371/journal.pone.0087592	0	0	NULL	0	0	0	0	0	0	0	0	0	NULL	39	37	39	NULL
10.1371/journal.pone.0087608	0	0	0	0	4	4	4	0	0	0	0	0	0	40	39	44	39
10.1371/journal.pone.0087621	0	0	0	1	0	4	2	0	0	0	0	0	0	13	12	13	12
10.1371/journal.pone.0087622	0	0	0	0	0	5	3	0	0	0	0	0	0	31	29	29	29
10.1371/journal.pone.0087624	1	0	0	1	12	15	15	0	0	0	0	0	0	306	312	312	312
10.1371/journal.pone.0087627	0	0	NULL	0	0	0	0	0	0	0	0	0	NULL	7	8	8	NULL
10.1371/journal.pone.0087653	1	0	0	1	3	6	6	0	0	0	0	0	0	16	17	18	17
10.1371/journal.pone.0087667	0	0	NULL	0	0	0	0	0	0	0	0	0	NULL	12	13	14	NULL
10.1371/journal.pone.0087674	1	0	0	3	2	10	8	0	0	0	0	0	0	39	41	40	41
10.1371/journal.pone.0087680	0	0	NULL	0	0	0	0	0	0	0	0	0	NULL	41	41	42	NULL
10.1371/journal.pone.0087691	0	0	NULL	0	0	0	0	0	0	0	0	0	NULL	6	7	7	NULL
10.1371/journal.pone.0087695	0	0	NULL	0	0	0	0	0	0	0	0	0	NULL	20	20	20	NULL
10.1371/journal.pone.0087730	0	0	0	0	0	2	2	0	0	0	0	0	0	28	27	28	27
10.1371/journal.pone.0087736	0	0	NULL	0	0	0	0	0	0	0	0	0	NULL	16	16	16	NULL
10.1371/journal.pone.0087744	0	0	NULL	0	0	0	0	0	0	0	0	0	NULL	30	31	32	NULL
10.1371/journal.pone.0087747	0	0	0	2	1	3	2	0	0	0	0	0	0	22	22	22	21
10.1371/journal.pone.0086633	0	0	NULL	0	0	0	0	0	0	0	0	0	NULL	31	29	29	NULL
10.1371/journal.pone.0086636	0	0	NULL	0	0	0	0	0	0	0	0	0	NULL	11	11	11	NULL
10.1371/journal.pone.0086643	0	0	0	0	0	0	0	0	0	0	0	0	0	33	35	37	35
10.1371/journal.pone.0086667	0	0	0	0	0	4	4	0	0	0	0	0	0	7	8	9	8
10.1371/journal.pone.0086686	0	0	NULL	0	0	0	0	0	0	0	0	0	NULL	23	26	29	NULL
10.1371/journal.pone.0086696	0	0	0	0	2	1	1	0	0	0	4	0	0	34	30	30	30
10.1371/journal.pone.0086700	0	0	NULL	0	0	0	0	0	0	0	0	0	NULL	16	14	14	NULL
10.1371/journal.pone.0086701	2	0	NULL	0	0	0	0	0	0	0	0	0	NULL	7	7	7	NULL
10.1371/journal.pone.0086702	1	0	NULL	0	0	0	0	0	0	0	0	0	NULL	39	38	42	NULL
10.1371/journal.pone.0086715	0	0	NULL	0	0	0	0	0	0	0	0	0	NULL	5	7	6	NULL
10.1371/journal.pone.0086730	11	0	1	2	1	4	3	0	0	0	0	0	0	20	22	21	22
10.1371/journal.pone.0086731	0	0	NULL	0	0	0	0	0	0	0	0	0	NULL	16	15	16	NULL
10.1371/journal.pone.0086755	0	0	0	0	1	2	2	0	0	0	0	0	0	20	22	22	22
10.1371/journal.pone.0086777	0	0	NULL	0	0	0	0	0	0	0	0	0	NULL	19	19	19	NULL
10.1371/journal.pone.0086785	0	0	0	0	3	3	2	0	0	0	0	0	0	22	24	26	24
10.1371/journal.pone.0086797	0	0	1	0	0	0	0	0	0	0	0	0	0	4	3	3	3
10.1371/journal.pone.0086820	0	0	NULL	0	0	0	0	0	0	0	0	0	NULL	7	7	8	NULL
10.1371/journal.pone.0086823	0	0	NULL	0	0	0	0	0	0	0	0	0	NULL	15	16	16	NULL
10.1371/journal.pone.0086840	0	0	0	0	3	2	1	0	0	0	7	0	0	13	14	14	14
10.1371/journal.pone.0086847	2	1	0	1	0	2	2	0	0	0	0	0	0	50	48	48	48
10.1371/journal.pone.0086854	0	0	0	0	11	11	9	0	0	0	0	0	0	55	57	58	57
10.1371/journal.pone.0086862	0	0	0	0	0	1	1	0	0	0	0	0	0	18	19	18	19
10.1371/journal.pone.0086867	0	0	NULL	0	0	0	0	0	0	0	0	0	NULL	10	8	9	NULL
10.1371/journal.pone.0086870	0	0	NULL	0	0	0	0	0	0	0	0	0	NULL	47	46	47	NULL
10.1371/journal.pone.0086891	0	0	0	0	1	1	1	0	0	0	0	0	0	18	15	18	15
10.1371/journal.pone.0086892	0	0	NULL	0	0	0	0	0	0	0	0	0	NULL	7	7	7	NULL
10.1371/journal.pone.0086897	2	0	NULL	0	0	0	0	0	0	0	0	0	NULL	28	29	30	NULL
10.1371/journal.pone.0086902	0	0	0	2	3	1	1	0	0	0	0	0	0	30	30	31	30
10.1371/journal.pone.0086905	0	0	0	0	1	1	1	0	0	0	0	0	0	19	18	18	18
10.1371/journal.pone.0086907	166	82	43	28	59	74	44	4	3	0	0	0	0	43	44	46	44
10.1371/journal.pone.0086916	0	0	0	0	1	1	1	0	0	0	0	0	0	37	37	38	37
10.1371/journal.pone.0086917	0	0	NULL	0	0	0	0	0	0	0	0	0	NULL	12	17	18	NULL
10.1371/journal.pone.0086926	0	0	NULL	0	0	0	0	0	0	0	0	0	NULL	21	21	22	NULL
10.1371/journal.pone.0086936	0	0	0	0	3	4	4	0	0	0	0	0	0	31	28	26	26
10.1371/journal.pone.0086939	2	0	NULL	0	0	0	0	0	0	0	0	0	NULL	67	70	76	NULL
10.1371/journal.pone.0086945	0	0	0	0	0	1	1	0	0	0	0	0	0	7	8	8	8
10.1371/journal.pone.0086958	0	0	0	0	1	1	1	0	0	0	0	0	0	11	12	13	12
10.1371/journal.pone.0086961	0	0	NULL	0	0	0	0	0	0	0	0	0	NULL	24	25	26	NULL
10.1371/journal.pone.0086976	0	0	NULL	0	0	0	0	0	0	0	0	0	NULL	18	16	17	NULL
10.1371/journal.pone.0086977	0	0	NULL	0	0	0	0	0	0	0	0	0	NULL	22	20	20	NULL
10.1371/journal.pone.0086980	0	0	0	0	0	3	2	0	0	0	3	0	0	58	59	60	59
10.1371/journal.pone.0087006	0	0	0	0	1	1	1	0	0	0	0	0	0	17	21	23	21
10.1371/journal.pone.0087007	0	0	0	0	0	2	2	0	0	0	0	0	0	14	18	19	18
10.1371/journal.pone.0087008	0	0	0	0	0	1	1	0	0	0	0	0	0	22	23	23	23
10.1371/journal.pone.0086355	0	0	NULL	0	0	0	0	0	0	0	0	0	NULL	10	11	11	NULL
10.1371/journal.pone.0086362	10	0	0	3	5	8	8	1	1	0	0	0	0	45	46	50	46
10.1371/journal.pone.0086365	0	0	NULL	0	0	0	0	0	0	0	0	0	NULL	30	31	31	NULL
10.1371/journal.pone.0086380	0	0	NULL	0	0	0	0	0	0	0	0	0	NULL	46	48	47	NULL
10.1371/journal.pone.0086386	0	0	NULL	0	0	0	0	0	0	0	0	0	NULL	29	42	45	NULL
10.1371/journal.pone.0086387	0	0	0	0	0	5	3	0	0	0	0	0	0	35	36	37	36
10.1371/journal.pone.0086388	0	0	0	0	0	0	0	0	0	0	0	0	0	219	145	149	128
10.1371/journal.pone.0086394	0	0	NULL	0	0	0	0	0	0	0	0	0	NULL	15	22	24	NULL
10.1371/journal.pone.0086417	0	0	NULL	0	0	0	0	0	0	0	0	0	NULL	4	4	4	NULL
10.1371/journal.pone.0086418	0	0	NULL	0	0	0	0	0	0	0	0	0	NULL	7	7	7	NULL
10.1371/journal.pone.0086450	0	0	0	0	0	1	1	0	0	0	0	0	0	11	12	13	12
10.1371/journal.pone.0086452	0	0	0	0	5	5	5	0	0	0	0	0	0	49	50	54	50
10.1371/journal.pone.0086457	3	0	0	4	1	5	5	0	0	0	0	0	0	64	66	71	66
10.1371/journal.pone.0086471	0	0	NULL	0	1	0	0	0	0	0	0	0	NULL	18	19	21	NULL
10.1371/journal.pone.0086476	0	0	0	0	2	2	2	0	0	0	1	0	0	25	26	26	26
10.1371/journal.pone.0086491	0	0	NULL	0	0	0	0	0	0	0	1	0	NULL	18	18	20	NULL
10.1371/journal.pone.0086498	0	0	0	0	1	2	2	0	0	0	0	0	0	65	48	57	48
10.1371/journal.pone.0086512	34	17	0	1	5	5	5	0	0	0	0	0	0	31	32	34	32
10.1371/journal.pone.0086516	0	0	0	0	0	2	2	0	0	0	0	0	0	16	15	15	15
10.1371/journal.pone.0086519	0	0	0	0	4	5	4	0	0	0	0	7	0	26	28	28	28
10.1371/journal.pone.0086520	0	0	0	0	0	1	1	0	0	0	0	0	0	12	14	14	14
10.1371/journal.pone.0086525	0	0	0	3	0	6	6	0	0	0	0	0	0	23	22	24	22
10.1371/journal.pone.0086526	0	0	NULL	0	0	0	0	0	0	0	0	0	NULL	25	23	26	NULL
10.1371/journal.pone.0086527	0	0	NULL	0	0	0	0	0	0	0	0	0	NULL	11	11	11	NULL
10.1371/journal.pone.0086528	0	0	0	0	0	0	0	0	0	0	0	0	0	8	7	7	7
10.1371/journal.pone.0086534	0	0	1	0	2	13	10	0	0	0	0	0	0	23	20	22	20
10.1371/journal.pone.0086535	0	0	0	1	2	1	1	0	0	0	0	0	0	47	50	50	50
10.1371/journal.pone.0086542	0	0	NULL	0	0	0	0	0	0	0	0	0	NULL	7	7	8	NULL
10.1371/journal.pone.0086550	0	0	NULL	0	0	0	0	0	0	0	0	0	NULL	12	12	12	NULL
10.1371/journal.pone.0086555	1	0	1	1	10	10	9	0	0	0	0	0	0	20	18	19	18
10.1371/journal.pone.0086571	0	0	0	1	11	13	13	0	0	0	0	0	0	6	7	8	7
10.1371/journal.pone.0086573	0	0	NULL	0	0	0	0	0	0	0	0	0	NULL	31	38	41	NULL
10.1371/journal.pone.0086577	0	0	NULL	0	0	0	0	0	0	0	0	0	NULL	8	9	9	NULL
10.1371/journal.pone.0086581	0	0	NULL	0	0	0	0	0	0	0	0	0	NULL	12	11	11	NULL
10.1371/journal.pone.0086597	0	0	0	0	0	0	0	0	0	0	0	0	0	49	28	30	28
10.1371/journal.pone.0086624	0	0	0	0	7	8	7	0	0	0	0	0	0	34	35	37	35
10.1371/journal.pone.0086632	0	0	NULL	0	0	0	0	0	0	0	0	0	NULL	20	18	18	NULL
10.1371/journal.pone.0086648	0	0	0	1	0	1	1	0	0	0	0	0	0	34	35	36	35
10.1371/journal.pone.0086655	0	0	NULL	0	0	0	0	0	0	0	0	0	NULL	19	19	19	NULL
10.1371/journal.pone.0086658	0	0	NULL	0	0	0	0	0	0	0	0	0	NULL	25	24	26	NULL
10.1371/journal.pone.0086663	3	0	0	0	0	0	0	0	0	2	1	3	0	16	19	22	19
10.1371/journal.pone.0086664	0	0	0	1	8	9	9	0	0	0	0	0	0	49	50	51	50
10.1371/journal.pone.0086669	0	0	0	0	1	2	2	0	0	0	0	0	0	46	49	51	49
10.1371/journal.pone.0086725	0	0	0	1	0	2	2	0	0	0	0	0	0	16	16	16	16
10.1371/journal.pone.0086727	0	0	NULL	0	0	0	0	0	0	0	0	0	NULL	3	4	4	NULL
10.1371/journal.pone.0086734	0	0	0	0	0	0	0	0	0	1	1	0	1	23	21	21	21
10.1371/journal.pone.0086748	1	0	0	0	5	5	5	0	0	0	0	0	0	50	47	52	47
10.1371/journal.pone.0086760	0	0	NULL	0	0	0	0	0	0	0	0	0	NULL	13	9	12	NULL
10.1371/journal.pone.0086762	0	0	0	3	16	13	4	0	0	0	0	0	0	20	20	20	20
10.1371/journal.pone.0086778	8	0	0	0	0	2	2	0	0	0	0	0	0	3	3	3	3
10.1371/journal.pone.0086786	0	0	0	0	1	2	2	0	0	0	0	0	0	22	21	23	21
10.1371/journal.pone.0086788	0	0	NULL	0	1	0	0	0	0	0	0	0	NULL	26	24	26	NULL
10.1371/journal.pone.0086793	0	0	NULL	0	0	0	0	0	0	0	0	0	NULL	32	32	34	NULL
10.1371/journal.pone.0086798	0	0	NULL	0	0	0	0	0	0	0	0	0	NULL	6	6	7	NULL
10.1371/journal.pone.0086803	0	0	1	0	30	31	27	0	0	0	0	0	0	17	19	21	19
10.1371/journal.pone.0086805	0	0	0	0	0	0	0	0	0	1	1	0	1	17	18	18	18
10.1371/journal.pone.0086806	0	0	1	0	0	1	1	0	0	0	0	0	0	33	35	36	35
10.1371/journal.pone.0086810	1	0	0	0	2	3	3	0	0	0	0	0	0	13	13	14	13
10.1371/journal.pone.0086828	0	0	NULL	0	0	0	0	0	0	0	0	0	NULL	17	16	16	NULL
10.1371/journal.pone.0086851	0	0	NULL	0	0	0	0	0	0	0	0	0	NULL	23	24	24	NULL
10.1371/journal.pone.0086860	0	0	1	0	2	2	2	0	0	1	1	0	1	17	17	17	17
10.1371/journal.pone.0086861	0	0	0	0	1	1	1	0	0	0	1	0	0	31	32	32	32
10.1371/journal.pone.0086872	0	0	NULL	0	0	0	0	0	0	0	0	0	NULL	29	28	29	NULL
10.1371/journal.pone.0086875	0	0	0	0	3	2	2	0	0	0	0	0	0	7	7	7	7
10.1371/journal.pone.0086877	0	0	0	0	0	1	1	0	0	0	0	0	0	5	5	5	5
10.1371/journal.pone.0086879	0	0	0	0	0	1	1	0	0	0	0	0	0	20	11	12	11
10.1371/journal.pone.0083967	0	0	0	1	1	4	4	0	0	0	0	0	0	102	98	106	98
10.1371/journal.pone.0083987	0	0	NULL	0	0	0	0	0	0	0	0	0	NULL	5	5	5	NULL
10.1371/journal.pone.0084006	10	5	27	5	121	139	131	0	0	0	4	72	0	72	74	74	74
10.1371/journal.pone.0084032	0	0	NULL	0	0	0	0	0	0	0	0	0	NULL	3	3	3	NULL
10.1371/journal.pone.0084079	3	0	NULL	0	0	0	0	0	0	0	0	0	NULL	1	NULL	0	NULL
10.1371/journal.pone.0084081	12	6	0	0	2	2	2	0	0	1	1	6	1	55	55	57	55
10.1371/journal.pone.0084125	0	0	0	0	0	1	1	0	0	0	0	0	0	8	7	7	7
10.1371/journal.pone.0084135	0	0	0	2	2	8	7	0	0	0	0	0	0	110	117	110	108
10.1371/journal.pone.0084158	4	2	0	0	4	4	1	0	0	0	0	0	0	22	22	22	22
10.1371/journal.pone.0084195	0	0	NULL	0	0	0	0	0	0	0	0	0	NULL	3	3	3	NULL
10.1371/journal.pone.0084221	0	0	NULL	0	0	0	0	0	0	0	0	0	NULL	11	11	11	NULL
10.1371/journal.pone.0084242	0	0	0	2	9	10	10	0	0	0	0	0	0	124	121	123	121
10.1371/journal.pone.0084248	2	0	NULL	0	0	0	0	0	0	0	0	0	NULL	14	12	12	NULL
10.1371/journal.pone.0084249	0	0	0	0	0	1	1	0	0	0	0	0	0	11	11	11	11
10.1371/journal.pone.0084260	0	0	NULL	0	0	0	0	0	0	0	0	0	NULL	54	51	53	NULL
10.1371/journal.pone.0084296	0	0	NULL	0	0	0	0	0	0	0	0	0	NULL	6	7	7	NULL
10.1371/journal.pone.0084302	2	1	0	3	3	4	3	0	0	0	0	0	0	13	12	12	12
10.1371/journal.pone.0084307	0	0	0	0	0	2	2	0	0	0	0	0	0	44	42	44	42
10.1371/journal.pone.0084347	9	0	1	0	1	1	1	0	0	0	2	0	0	32	32	35	32
10.1371/journal.pone.0084348	0	0	0	1	5	8	8	0	0	1	1	1	1	53	47	48	47
10.1371/journal.pone.0084351	0	0	NULL	0	0	0	0	0	0	0	0	0	NULL	18	18	19	NULL
10.1371/journal.pone.0084377	0	0	1	0	0	0	0	0	0	0	0	0	0	23	24	24	24
10.1371/journal.pone.0086107	0	0	0	0	1	1	1	0	0	0	0	0	0	23	22	24	22
10.1371/journal.pone.0086129	0	0	0	0	1	1	1	0	0	0	0	0	0	18	18	18	18
10.1371/journal.pone.0086132	90	0	2	18	13	18	17	0	0	0	0	0	0	69	72	75	72
10.1371/journal.pone.0086137	0	0	NULL	0	0	0	0	0	0	0	0	0	NULL	10	9	9	NULL
10.1371/journal.pone.0086153	0	0	0	0	0	1	1	0	0	0	0	0	0	29	28	29	28
10.1371/journal.pone.0086163	0	0	5	0	17	18	13	0	0	0	0	0	0	54	42	44	42
10.1371/journal.pone.0086171	0	0	5	0	13	57	44	0	0	0	0	0	0	18	22	23	22
10.1371/journal.pone.0086173	0	0	NULL	0	0	0	0	0	0	0	0	0	NULL	49	49	52	NULL
10.1371/journal.pone.0086176	0	0	0	0	1	1	1	0	0	0	0	0	0	53	55	53	55
10.1371/journal.pone.0086177	0	0	NULL	0	0	0	0	0	0	0	0	0	NULL	16	16	17	NULL
10.1371/journal.pone.0086201	0	0	0	2	1	2	2	0	0	0	0	0	0	14	14	14	14
10.1371/journal.pone.0086203	0	0	0	0	0	1	1	0	0	0	0	0	0	20	20	20	20
10.1371/journal.pone.0086212	12	12	0	0	2	5	5	0	0	0	0	0	0	27	27	26	27
10.1371/journal.pone.0086228	0	0	0	0	1	1	1	0	0	0	0	0	0	10	10	10	10
10.1371/journal.pone.0086229	0	0	0	0	28	27	23	0	0	1	1	0	1	24	23	23	23
10.1371/journal.pone.0086240	0	0	0	0	0	1	1	0	0	0	0	0	0	28	23	25	23
10.1371/journal.pone.0086241	0	0	NULL	0	0	0	0	0	0	0	0	0	NULL	14	13	13	NULL
10.1371/journal.pone.0086242	0	0	1	0	2	5	5	0	0	0	0	0	0	42	43	43	43
10.1371/journal.pone.0086244	0	0	NULL	0	0	0	0	0	0	0	0	0	NULL	41	35	36	NULL
10.1371/journal.pone.0086250	0	0	NULL	0	0	0	0	0	0	0	0	0	NULL	29	26	27	NULL
10.1371/journal.pone.0086258	0	0	0	0	1	2	2	0	0	0	0	0	0	59	58	58	58
10.1371/journal.pone.0086259	0	0	NULL	0	0	0	0	0	0	0	0	0	NULL	7	11	11	NULL
10.1371/journal.pone.0086264	0	0	0	1	2	4	4	0	0	0	0	0	0	23	22	21	22
10.1371/journal.pone.0086268	0	0	0	0	6	13	7	0	0	0	0	0	0	21	22	22	22
10.1371/journal.pone.0086272	0	0	0	1	0	5	5	0	0	0	0	0	0	10	10	10	10
10.1371/journal.pone.0086277	0	0	0	9	9	8	8	0	0	0	0	0	0	35	38	42	37
10.1371/journal.pone.0086281	0	0	0	2	1	2	2	0	0	0	0	0	0	31	34	34	34
10.1371/journal.pone.0086284	0	0	0	0	0	1	1	0	0	0	0	0	0	7	10	11	10
10.1371/journal.pone.0086293	0	0	NULL	0	0	0	0	0	0	0	0	0	NULL	18	21	21	NULL
10.1371/journal.pone.0086295	0	0	0	0	1	1	1	0	0	0	0	0	0	42	42	45	42
10.1371/journal.pone.0086311	0	0	0	5	0	5	3	0	0	0	0	0	0	12	9	13	9
10.1371/journal.pone.0086313	0	0	NULL	0	0	0	0	0	0	0	0	0	NULL	10	10	10	NULL
10.1371/journal.pone.0086318	0	0	0	0	1	2	2	0	0	0	0	0	0	13	13	14	13
10.1371/journal.pone.0086324	0	0	NULL	0	0	0	0	0	0	0	0	0	NULL	12	12	13	NULL
10.1371/journal.pone.0086339	0	0	NULL	0	0	0	0	0	0	0	0	0	NULL	13	9	9	NULL
10.1371/journal.pone.0086340	2	1	1	0	0	0	0	0	0	0	0	0	0	24	22	22	22
10.1371/journal.pone.0086354	0	0	NULL	0	0	0	0	0	0	0	0	0	NULL	19	20	22	NULL
10.1371/journal.pone.0086360	0	0	NULL	0	0	0	0	0	0	0	0	0	NULL	5	6	6	NULL
10.1371/journal.pone.0086364	0	0	NULL	0	0	0	0	0	0	0	0	0	NULL	48	52	52	NULL
10.1371/journal.pone.0086367	0	0	NULL	0	0	0	0	0	0	0	0	0	NULL	7	6	6	NULL
10.1371/journal.pone.0086370	0	0	0	0	1	1	1	0	0	0	0	0	0	23	20	20	20
10.1371/journal.pone.0086406	0	0	0	0	4	4	4	0	0	0	0	0	0	32	32	34	32
10.1371/journal.pone.0086416	0	0	0	0	0	2	2	0	0	0	0	0	0	18	20	19	20
10.1371/journal.pone.0086421	0	0	NULL	0	0	0	0	0	0	0	0	0	NULL	14	14	11	NULL
10.1371/journal.pone.0084973	0	0	NULL	0	0	0	0	0	0	1	1	0	NULL	26	26	28	NULL
10.1371/journal.pone.0084983	0	0	NULL	0	0	0	0	0	0	0	0	0	NULL	27	28	29	NULL
10.1371/journal.pone.0084992	5	3	0	0	5	6	6	0	0	0	0	0	0	48	51	52	51
10.1371/journal.pone.0084994	2	1	0	1	0	1	1	0	0	0	0	0	0	42	43	43	43
10.1371/journal.pone.0085002	0	0	NULL	0	0	0	0	0	0	0	0	0	NULL	6	4	4	NULL
10.1371/journal.pone.0085012	0	0	1	0	7	6	6	0	0	0	0	0	0	38	3	3	3
10.1371/journal.pone.0085017	0	0	0	5	2	10	9	0	0	0	0	0	0	41	43	43	43
10.1371/journal.pone.0085020	1	0	NULL	0	0	0	0	0	0	0	0	0	NULL	23	18	23	NULL
10.1371/journal.pone.0085037	0	0	0	0	0	1	1	0	0	0	0	0	0	31	30	30	30
10.1371/journal.pone.0085039	0	0	0	0	1	1	1	0	0	0	0	0	0	26	23	25	23
10.1371/journal.pone.0085047	42	21	1	273	324	363	305	2	2	0	0	0	0	34	32	33	32
10.1371/journal.pone.0085049	122	61	0	21	27	25	25	0	0	0	0	0	0	72	76	78	76
10.1371/journal.pone.0085051	0	0	1	1	5	12	10	0	0	0	0	0	0	65	70	72	70
10.1371/journal.pone.0085090	0	0	0	0	0	1	1	0	0	0	10	0	0	24	19	19	19
10.1371/journal.pone.0085095	0	0	0	0	1	1	1	0	0	0	0	0	0	11	10	10	10
10.1371/journal.pone.0085100	0	0	1	1	0	9	9	0	0	0	0	0	0	63	66	68	66
10.1371/journal.pone.0085114	0	0	NULL	0	0	0	0	0	0	0	0	0	NULL	11	10	10	NULL
10.1371/journal.pone.0085133	22	10	0	44	25	45	38	0	0	0	0	0	0	36	36	39	36
10.1371/journal.pone.0085140	0	0	0	0	5	6	6	0	0	0	0	0	0	93	90	90	71
10.1371/journal.pone.0085178	0	0	0	0	3	3	3	0	0	0	0	0	0	60	57	58	57
10.1371/journal.pone.0085180	0	0	NULL	0	0	0	0	0	0	0	0	0	NULL	11	7	7	NULL
10.1371/journal.pone.0085182	0	0	1	0	0	0	0	0	0	0	0	0	0	108	111	113	111
10.1371/journal.pone.0085183	0	0	0	1	0	1	1	0	0	0	1	4	0	23	23	24	23
10.1371/journal.pone.0085185	0	0	0	0	8	8	8	0	0	0	0	0	0	60	52	54	52
10.1371/journal.pone.0085187	0	0	0	0	1	1	1	0	0	0	0	0	0	5	6	6	6
10.1371/journal.pone.0085195	0	0	0	0	3	5	4	0	0	0	0	0	0	27	28	26	28
10.1371/journal.pone.0085203	0	0	5	1	60	55	50	1	1	0	0	0	0	33	35	36	35
10.1371/journal.pone.0085224	0	0	NULL	0	0	0	0	0	0	0	0	0	NULL	12	9	11	NULL
10.1371/journal.pone.0085238	0	0	NULL	0	0	0	0	0	0	0	0	0	NULL	9	11	12	NULL
10.1371/journal.pone.0085248	6	0	0	1	1	2	2	0	0	0	0	0	0	8	6	7	6
10.1371/journal.pone.0085256	0	0	1	2	2	3	3	0	0	0	0	0	0	44	40	46	40
10.1371/journal.pone.0085258	0	0	NULL	0	0	0	0	0	0	0	0	0	NULL	20	18	21	NULL
10.1371/journal.pone.0085284	0	0	NULL	0	0	0	0	0	0	0	0	0	NULL	17	20	17	NULL
10.1371/journal.pone.0085293	50	1	1	51	59	57	45	0	0	0	0	22	0	37	38	40	38
10.1371/journal.pone.0085295	132	63	1	1	58	85	82	0	0	0	0	0	0	106	106	112	106
10.1371/journal.pone.0085296	0	0	0	0	1	1	1	0	0	0	0	0	0	9	9	9	9
10.1371/journal.pone.0085335	0	0	NULL	0	0	0	0	0	0	0	0	0	NULL	27	29	31	NULL
10.1371/journal.pone.0085351	0	0	1	0	0	1	1	0	0	0	0	0	0	27	30	29	30
10.1371/journal.pone.0085355	214	37	8	656	446	627	565	1	1	0	0	0	0	46	44	46	44
10.1371/journal.pone.0085381	0	0	0	0	0	1	1	0	0	0	0	0	0	20	17	17	17
10.1371/journal.pone.0085387	282	141	24	11	107	118	71	0	0	0	0	3	0	39	44	44	44
10.1371/journal.pone.0085391	0	0	0	2	3	4	4	0	0	0	0	0	0	12	12	13	12
10.1371/journal.pone.0085393	0	0	0	1	0	1	1	0	0	0	0	0	0	7	7	7	7
10.1371/journal.pone.0085425	0	0	0	0	3	3	3	0	0	0	0	0	0	54	54	57	54
10.1371/journal.pone.0084396	0	0	0	0	2	1	1	0	0	0	0	0	0	27	28	28	28
10.1371/journal.pone.0084406	0	0	NULL	0	0	0	0	0	0	0	0	0	NULL	11	15	15	NULL
10.1371/journal.pone.0084424	4	0	0	1	31	38	36	0	0	0	0	0	0	10	7	8	7
10.1371/journal.pone.0084445	0	0	0	2	11	15	13	2	2	0	0	0	0	48	54	51	54
10.1371/journal.pone.0084472	0	0	NULL	0	0	0	0	0	0	0	0	0	NULL	29	31	32	NULL
10.1371/journal.pone.0084477	0	0	NULL	0	0	0	0	0	0	0	4	0	NULL	13	12	12	NULL
10.1371/journal.pone.0084480	6	0	6	4	9	34	31	6	4	0	0	0	0	23	24	24	24
10.1371/journal.pone.0084485	0	0	0	0	0	1	1	0	0	0	0	0	0	6	8	8	8
10.1371/journal.pone.0084502	0	0	NULL	0	0	0	0	0	0	0	0	0	NULL	16	16	18	NULL
10.1371/journal.pone.0084556	0	0	NULL	0	0	0	0	0	0	0	0	0	NULL	16	18	19	NULL
10.1371/journal.pone.0084563	0	0	0	0	0	1	1	0	0	0	4	0	0	19	18	19	17
10.1371/journal.pone.0084572	0	0	1	0	0	1	1	0	0	0	0	0	0	77	78	78	78
10.1371/journal.pone.0084598	0	0	0	0	3	3	3	0	0	0	0	0	0	15	16	16	16
10.1371/journal.pone.0084623	0	0	NULL	0	0	0	0	0	0	0	0	0	NULL	28	27	29	NULL
10.1371/journal.pone.0084628	0	0	1	1	0	3	3	0	0	0	0	0	0	33	37	39	37
10.1371/journal.pone.0084640	0	0	0	0	1	1	1	0	0	0	0	0	0	32	30	31	30
10.1371/journal.pone.0084651	0	0	NULL	0	0	0	0	0	0	0	0	0	NULL	49	53	51	NULL
10.1371/journal.pone.0084652	12	3	1	2	54	57	52	0	0	0	0	0	0	42	41	41	41
10.1371/journal.pone.0084666	0	0	NULL	0	0	0	0	0	0	0	0	0	NULL	10	10	10	NULL
10.1371/journal.pone.0084671	2	0	0	0	2	2	2	0	0	0	0	0	0	41	34	35	34
10.1371/journal.pone.0084677	0	0	1	0	5	6	6	0	0	0	0	0	0	37	38	38	38
10.1371/journal.pone.0084684	1	0	0	2	2	6	3	0	0	0	0	0	0	17	20	21	20
10.1371/journal.pone.0086424	0	0	0	0	0	1	1	0	0	0	0	0	0	16	12	12	12
10.1371/journal.pone.0086434	1	1	NULL	0	0	0	0	0	0	0	0	0	NULL	20	19	18	NULL
10.1371/journal.pone.0086440	0	0	NULL	0	0	0	0	0	0	0	0	0	NULL	15	14	14	NULL
10.1371/journal.pone.0086448	0	0	0	2	0	2	1	0	0	0	0	0	0	42	41	45	41
10.1371/journal.pone.0086455	6	0	0	2	0	1	1	0	0	0	0	0	0	9	9	9	9
10.1371/journal.pone.0086458	0	0	2	0	1	0	0	0	0	0	0	0	0	16	13	12	13
10.1371/journal.pone.0086482	0	0	0	0	0	2	2	0	0	0	0	0	0	19	17	18	17
10.1371/journal.pone.0086507	0	0	0	0	0	1	1	0	0	0	0	0	0	13	14	16	14
10.1371/journal.pone.0086511	0	0	NULL	0	0	0	0	0	0	0	0	0	NULL	15	16	17	NULL
10.1371/journal.pone.0086538	0	0	NULL	0	0	0	0	0	0	0	0	0	NULL	12	12	13	NULL
10.1371/journal.pone.0086540	0	0	NULL	0	0	0	0	0	0	0	0	0	NULL	10	9	10	NULL
10.1371/journal.pone.0086553	0	0	NULL	0	0	0	0	0	0	0	0	0	NULL	6	6	6	NULL
10.1371/journal.pone.0086556	0	0	NULL	0	0	0	0	0	0	0	0	0	NULL	8	9	9	NULL
10.1371/journal.pone.0086557	0	0	NULL	0	0	0	0	0	0	0	0	0	NULL	16	15	15	NULL
10.1371/journal.pone.0086564	0	0	NULL	0	0	0	0	0	0	0	0	0	NULL	18	19	19	NULL
10.1371/journal.pone.0086584	0	0	0	0	4	8	5	0	0	0	0	0	0	37	32	34	32
10.1371/journal.pone.0086603	52	26	1	4	19	23	17	0	0	0	0	0	0	85	79	82	79
10.1371/journal.pone.0086622	4	2	2	0	15	13	13	0	0	0	0	0	0	128	137	152	137
10.1371/journal.pone.0086629	0	0	0	0	0	1	1	0	0	0	0	0	0	16	17	18	17
10.1371/journal.pone.0086630	0	0	0	0	0	0	0	0	0	0	0	0	0	4	1	1	1
10.1371/journal.pone.0086637	0	0	0	1	0	1	1	0	0	0	0	0	0	34	27	29	27
10.1371/journal.pone.0086657	0	0	0	0	1	1	1	0	0	0	0	0	0	22	22	22	22
10.1371/journal.pone.0086661	0	0	0	1	0	1	1	0	0	0	0	0	0	12	14	14	14
10.1371/journal.pone.0086665	0	0	0	1	1	1	1	0	0	0	0	0	0	10	7	8	7
10.1371/journal.pone.0086672	5	5	NULL	0	0	0	0	0	0	0	0	0	NULL	30	29	34	NULL
10.1371/journal.pone.0086673	0	0	0	10	11	9	7	0	0	0	0	0	0	24	23	24	23
10.1371/journal.pone.0086676	0	0	NULL	0	0	0	0	0	0	0	0	0	NULL	7	8	8	NULL
10.1371/journal.pone.0086687	0	0	0	0	5	4	3	0	0	0	0	0	0	27	23	22	23
10.1371/journal.pone.0086691	0	0	0	0	0	2	2	0	0	0	0	0	0	31	31	31	31
10.1371/journal.pone.0086703	0	0	0	0	0	1	1	0	0	0	0	0	0	16	16	16	16
10.1371/journal.pone.0086712	18	2	4	20	42	40	38	0	0	5	7	16	5	37	26	26	26
10.1371/journal.pone.0086726	0	0	0	0	2	3	3	0	0	0	0	0	0	16	15	16	15
10.1371/journal.pone.0086742	0	0	0	0	1	1	1	0	0	0	0	0	0	12	12	12	12
10.1371/journal.pone.0086743	0	0	NULL	0	0	0	0	0	0	0	0	0	NULL	32	29	31	NULL
10.1371/journal.pone.0086751	0	0	NULL	0	0	0	0	0	0	0	0	0	NULL	25	26	26	NULL
10.1371/journal.pone.0086766	0	0	NULL	0	0	0	0	0	0	0	0	0	NULL	5	5	5	NULL
10.1371/journal.pone.0086770	0	0	NULL	0	0	0	0	0	0	0	0	0	NULL	10	9	11	NULL
10.1371/journal.pone.0086774	0	0	NULL	0	0	0	0	0	0	0	0	0	NULL	8	9	9	NULL
10.1371/journal.pone.0086775	0	0	NULL	0	0	0	0	0	0	0	0	0	NULL	22	22	23	NULL
10.1371/journal.pone.0086780	0	0	1	0	1	1	1	0	0	0	0	0	0	43	42	43	42
10.1371/journal.pone.0086782	0	0	1	0	0	1	1	0	0	0	0	0	0	35	36	38	36
10.1371/journal.pone.0086790	0	0	0	1	0	2	2	0	0	1	1	0	1	47	43	44	43
10.1371/journal.pone.0086801	0	0	0	1	0	5	4	0	0	0	0	0	0	21	19	22	19
10.1371/journal.pone.0086807	5	0	8	1	109	98	96	0	0	1	2	4	2	41	39	39	39
10.1371/journal.pone.0085428	0	0	1	0	0	0	0	0	0	0	0	0	0	8	8	9	8
10.1371/journal.pone.0085433	0	0	2	0	16	16	16	0	0	0	0	0	0	98	103	110	103
10.1371/journal.pone.0085444	0	0	NULL	0	0	0	0	0	0	0	0	0	NULL	25	24	24	NULL
10.1371/journal.pone.0085449	0	0	NULL	0	0	0	0	0	0	0	0	0	NULL	11	11	11	NULL
10.1371/journal.pone.0085453	0	0	NULL	0	0	0	0	0	0	0	0	0	NULL	16	17	17	NULL
10.1371/journal.pone.0085458	0	0	NULL	0	0	0	0	0	0	0	0	0	NULL	8	8	8	NULL
10.1371/journal.pone.0085473	0	0	0	0	3	7	7	0	0	0	0	0	0	81	84	95	84
10.1371/journal.pone.0085478	0	0	1	1	3	7	6	0	0	0	0	0	0	83	95	99	95
10.1371/journal.pone.0085481	0	0	1	0	1	9	9	0	0	0	0	0	0	34	32	34	32
10.1371/journal.pone.0085524	0	0	NULL	0	0	0	0	0	0	0	0	0	NULL	16	16	16	NULL
10.1371/journal.pone.0085525	1	0	NULL	0	0	0	0	0	0	0	0	0	NULL	21	20	20	NULL
10.1371/journal.pone.0085565	0	0	NULL	0	0	0	0	0	0	0	0	0	NULL	17	17	17	NULL
10.1371/journal.pone.0085571	0	0	0	1	0	1	1	0	0	0	0	0	0	9	9	9	9
10.1371/journal.pone.0085573	0	0	0	2	4	6	6	0	0	0	0	0	0	69	72	73	72
10.1371/journal.pone.0085579	0	0	NULL	0	0	0	0	0	0	0	0	0	NULL	19	19	20	NULL
10.1371/journal.pone.0085593	0	0	NULL	0	0	0	0	0	0	0	0	0	NULL	16	14	15	NULL
10.1371/journal.pone.0085598	0	0	0	0	0	1	1	0	0	0	0	0	0	41	42	46	42
10.1371/journal.pone.0085619	0	0	0	0	0	1	1	0	0	0	0	0	0	6	6	6	6
10.1371/journal.pone.0085622	57	1	2	11	10	13	13	0	0	0	0	0	0	142	139	143	139
10.1371/journal.pone.0085623	0	0	0	0	1	2	2	0	0	0	0	0	0	14	19	20	19
10.1371/journal.pone.0085635	0	0	1	0	25	27	27	0	0	0	1	3	0	68	72	78	72
10.1371/journal.pone.0085646	0	0	0	0	0	12	9	0	0	0	0	0	0	27	24	26	24
10.1371/journal.pone.0085665	0	0	0	0	0	1	1	0	0	0	0	0	0	3	3	3	3
10.1371/journal.pone.0085671	0	0	NULL	0	0	0	0	0	0	0	0	0	NULL	33	31	31	NULL
10.1371/journal.pone.0085672	0	0	NULL	0	0	0	0	0	0	0	0	0	NULL	7	11	11	NULL
10.1371/journal.pone.0085691	0	0	0	0	2	2	2	0	0	0	0	0	0	29	29	31	29
10.1371/journal.pone.0085698	0	0	NULL	0	0	0	0	0	0	0	0	0	NULL	28	28	30	NULL
10.1371/journal.pone.0085719	0	0	NULL	0	0	0	0	0	0	0	0	0	NULL	7	4	4	NULL
10.1371/journal.pone.0085727	0	0	NULL	0	0	0	0	0	0	0	0	0	NULL	6	6	6	NULL
10.1371/journal.pone.0085730	0	0	0	0	0	1	1	0	0	0	0	0	0	7	9	9	9
10.1371/journal.pone.0085736	0	0	0	0	1	1	1	0	0	0	0	0	0	44	39	43	39
10.1371/journal.pone.0085738	0	0	NULL	0	0	0	0	0	0	0	0	0	NULL	13	15	14	NULL
10.1371/journal.pone.0085746	0	0	NULL	0	0	0	0	0	0	0	0	0	NULL	21	21	21	NULL
10.1371/journal.pone.0085761	0	0	0	2	0	4	4	0	0	0	0	0	0	66	66	67	66
10.1371/journal.pone.0085764	0	0	0	0	4	6	4	0	0	0	1	0	0	22	23	23	23
10.1371/journal.pone.0085765	0	0	NULL	0	0	0	0	0	0	0	0	0	NULL	35	35	36	NULL
10.1371/journal.pone.0085782	0	0	1	0	0	0	0	0	0	0	0	0	0	32	24	24	24
10.1371/journal.pone.0085793	14	7	0	0	2	2	2	0	0	0	0	0	0	18	17	19	17
10.1371/journal.pone.0085803	0	0	NULL	0	0	0	0	0	0	0	0	0	NULL	10	11	11	NULL
10.1371/journal.pone.0085816	0	0	0	0	2	2	2	0	0	0	0	0	0	23	23	23	23
10.1371/journal.pone.0085822	0	0	0	0	3	4	3	0	0	0	0	0	0	34	36	37	36
10.1371/journal.pone.0085828	0	0	0	0	1	2	2	0	0	0	0	0	0	47	46	47	46
10.1371/journal.pone.0085832	0	0	NULL	0	0	0	0	0	0	0	0	0	NULL	8	5	5	NULL
10.1371/journal.pone.0085840	0	0	NULL	0	0	0	0	0	0	0	0	0	NULL	6	7	6	NULL
10.1371/journal.pone.0084689	16	8	1	71	98	163	126	2	2	0	0	0	0	194	196	203	196
10.1371/journal.pone.0084693	0	0	0	0	0	0	0	0	0	0	0	0	0	20	19	19	19
10.1371/journal.pone.0084728	0	0	0	0	1	2	2	0	0	0	0	0	0	15	11	11	11
10.1371/journal.pone.0084734	0	0	NULL	0	0	0	0	0	0	0	0	0	NULL	27	25	25	NULL
10.1371/journal.pone.0084755	0	0	NULL	0	0	0	0	0	0	0	0	0	NULL	50	50	53	NULL
10.1371/journal.pone.0084756	4	2	0	0	0	3	3	0	0	0	0	0	0	28	26	27	26
10.1371/journal.pone.0084762	0	0	NULL	0	0	0	0	0	0	0	0	0	NULL	26	27	27	NULL
10.1371/journal.pone.0084764	0	0	0	0	0	1	1	0	0	0	0	0	0	19	23	24	23
10.1371/journal.pone.0084786	0	0	NULL	0	0	0	0	0	0	0	0	0	NULL	11	12	12	NULL
10.1371/journal.pone.0084800	0	0	0	0	0	0	0	0	0	0	0	0	0	17	19	20	19
10.1371/journal.pone.0084812	0	0	0	0	0	2	2	0	0	0	0	0	0	20	14	14	14
10.1371/journal.pone.0084822	0	0	0	0	1	2	2	0	0	0	0	0	0	14	15	16	15
10.1371/journal.pone.0084828	0	0	0	10	4	15	10	0	0	0	0	0	0	9	10	9	10
10.1371/journal.pone.0084837	0	0	0	0	0	0	0	0	0	0	0	0	0	29	27	27	27
10.1371/journal.pone.0084859	0	0	0	1	0	1	1	0	0	0	0	0	0	32	34	35	34
10.1371/journal.pone.0084865	0	0	0	1	0	1	1	0	0	0	0	0	0	23	24	26	24
10.1371/journal.pone.0084880	0	0	NULL	0	0	0	0	0	0	0	0	0	NULL	2	5	4	NULL
10.1371/journal.pone.0084887	0	0	8	0	31	29	23	0	0	1	1	0	1	75	77	80	77
10.1371/journal.pone.0084905	2	0	0	0	2	7	7	0	0	0	0	0	0	120	104	114	104
10.1371/journal.pone.0084920	0	0	0	0	0	1	1	0	0	0	0	0	0	34	34	35	34
10.1371/journal.pone.0084923	0	0	NULL	0	0	0	0	0	0	0	0	0	NULL	11	11	11	NULL
10.1371/journal.pone.0084931	0	0	0	2	4	1	1	0	0	0	0	0	0	41	40	40	40
10.1371/journal.pone.0086811	0	0	NULL	0	0	0	0	0	0	0	0	0	NULL	5	5	5	NULL
10.1371/journal.pone.0086817	0	0	0	3	3	4	4	0	0	0	0	2	0	31	33	34	33
10.1371/journal.pone.0086825	0	0	0	0	3	3	2	0	0	0	0	0	0	8	8	8	8
10.1371/journal.pone.0086829	0	0	NULL	0	0	0	0	0	0	0	0	0	NULL	19	19	21	NULL
10.1371/journal.pone.0086831	0	0	0	1	0	1	1	1	1	0	0	0	0	30	33	34	33
10.1371/journal.pone.0086836	0	0	0	0	0	2	1	0	0	0	0	0	0	21	19	20	19
10.1371/journal.pone.0086838	0	0	NULL	0	0	0	0	0	0	0	0	0	NULL	14	15	14	NULL
10.1371/journal.pone.0086839	0	0	NULL	0	0	0	0	0	0	0	0	0	NULL	7	7	8	NULL
10.1371/journal.pone.0086844	0	0	0	0	0	3	2	0	0	0	0	0	0	52	49	49	52
10.1371/journal.pone.0086845	0	0	0	0	1	1	1	0	0	0	0	0	0	16	19	19	19
10.1371/journal.pone.0086850	0	0	0	0	0	5	5	0	0	0	0	0	0	29	24	24	24
10.1371/journal.pone.0086859	0	0	3	1	1	2	2	0	0	2	2	22	1	15	16	17	16
10.1371/journal.pone.0086864	0	0	0	0	22	22	21	0	0	1	2	9	1	12	13	12	13
10.1371/journal.pone.0086866	0	0	0	1	0	1	1	0	0	0	0	0	0	16	13	14	13
10.1371/journal.pone.0086889	0	0	0	0	0	1	1	0	0	0	0	0	0	40	42	45	42
10.1371/journal.pone.0086901	0	0	NULL	0	0	0	0	0	0	0	0	0	NULL	12	12	12	NULL
10.1371/journal.pone.0086903	88	1	0	0	0	1	1	0	0	0	0	0	0	63	56	57	56
10.1371/journal.pone.0086915	0	0	NULL	0	0	0	0	0	0	0	0	0	NULL	29	27	31	NULL
10.1371/journal.pone.0086919	0	0	1	1	1	4	3	0	0	0	0	0	0	28	29	29	29
10.1371/journal.pone.0086920	0	0	NULL	0	0	0	0	0	0	0	0	0	NULL	39	37	39	NULL
10.1371/journal.pone.0086935	2	1	0	0	1	4	4	0	0	0	0	0	0	50	48	49	48
10.1371/journal.pone.0086940	0	0	1	0	4	4	4	0	0	0	0	0	0	37	33	38	33
10.1371/journal.pone.0086944	3	0	0	0	0	0	0	0	0	0	0	0	0	37	39	40	39
10.1371/journal.pone.0086950	4	2	0	0	0	1	1	0	0	0	0	0	0	47	53	53	53
10.1371/journal.pone.0086955	0	0	NULL	0	0	0	0	0	0	0	1	0	NULL	14	16	15	NULL
10.1371/journal.pone.0086957	0	0	0	0	6	6	5	0	0	0	0	0	0	9	8	8	8
10.1371/journal.pone.0086959	0	0	0	0	0	1	1	0	0	0	0	0	0	11	12	12	12
10.1371/journal.pone.0086960	0	0	NULL	0	0	0	0	0	0	0	0	0	NULL	16	14	14	NULL
10.1371/journal.pone.0086962	0	0	0	0	1	1	1	0	0	0	0	0	0	43	41	41	41
10.1371/journal.pone.0086963	0	0	NULL	0	0	0	0	0	0	0	0	0	NULL	8	8	8	NULL
10.1371/journal.pone.0086970	1	1	0	3	3	4	1	3	1	0	0	0	0	28	23	23	23
10.1371/journal.pone.0086971	2	1	0	0	5	7	7	0	0	0	0	0	0	25	27	27	27
10.1371/journal.pone.0086979	0	0	0	1	0	2	2	0	0	0	0	0	0	28	29	29	29
10.1371/journal.pone.0086981	0	0	NULL	0	0	0	0	0	0	0	0	0	NULL	18	18	18	NULL
10.1371/journal.pone.0086983	0	0	0	0	1	1	1	0	0	0	0	0	0	32	27	29	27
10.1371/journal.pone.0086986	0	0	0	0	0	3	3	0	0	0	0	0	0	25	27	29	27
10.1371/journal.pone.0086987	0	0	NULL	0	0	0	0	0	0	0	0	0	NULL	13	13	13	NULL
10.1371/journal.pone.0086994	0	0	NULL	0	0	0	0	0	0	0	0	0	NULL	4	2	2	NULL
10.1371/journal.pone.0086999	0	0	0	0	3	4	4	0	0	0	0	0	0	20	19	19	19
10.1371/journal.pone.0087005	0	0	NULL	0	0	0	0	0	0	0	0	0	NULL	16	18	18	NULL
10.1371/journal.pone.0087018	0	0	NULL	0	0	0	0	0	0	0	0	0	NULL	29	29	29	NULL
10.1371/journal.pone.0087025	0	0	NULL	0	2	0	0	0	0	0	0	0	NULL	26	25	26	NULL
10.1371/journal.pone.0087027	0	0	0	0	0	1	1	0	0	0	0	0	0	4	2	2	2
10.1371/journal.pone.0087042	0	0	0	0	5	8	7	0	0	0	0	0	0	55	54	63	54
10.1371/journal.pone.0085841	0	0	NULL	0	0	0	0	0	0	0	0	0	NULL	35	32	34	NULL
10.1371/journal.pone.0085842	0	0	0	15	10	17	1	10	1	0	0	0	0	32	34	35	34
10.1371/journal.pone.0085851	0	0	NULL	0	0	0	0	0	0	0	0	0	NULL	13	15	15	NULL
10.1371/journal.pone.0085860	0	0	0	4	6	8	1	0	0	0	0	0	0	10	10	11	10
10.1371/journal.pone.0085861	0	0	0	0	1	1	1	0	0	0	0	0	0	35	39	39	39
10.1371/journal.pone.0085865	0	0	0	0	1	2	1	0	0	0	0	0	0	21	23	23	23
10.1371/journal.pone.0085866	0	0	NULL	0	0	0	0	0	0	0	0	0	NULL	12	11	12	NULL
10.1371/journal.pone.0085903	0	0	0	1	12	13	12	0	0	0	0	0	0	28	23	26	23
10.1371/journal.pone.0085905	0	0	NULL	0	0	0	0	0	0	0	0	0	NULL	22	22	23	NULL
10.1371/journal.pone.0085918	6	0	1	0	0	3	3	0	0	0	0	0	0	31	31	32	31
10.1371/journal.pone.0085923	1	0	1	1	0	0	0	0	0	0	0	0	0	21	22	22	22
10.1371/journal.pone.0085939	0	0	0	0	1	3	3	0	0	0	0	0	0	14	14	15	14
10.1371/journal.pone.0085948	1	0	0	0	5	6	6	0	0	0	0	0	0	52	51	52	51
10.1371/journal.pone.0085960	0	0	NULL	0	0	0	0	0	0	0	0	0	NULL	43	49	52	NULL
10.1371/journal.pone.0085970	8	0	0	1	0	7	6	0	0	0	0	0	0	48	48	50	48
10.1371/journal.pone.0085987	2	1	0	3	10	8	8	0	0	0	0	0	0	38	42	44	42
10.1371/journal.pone.0085999	1	0	0	0	2	2	2	0	0	0	0	0	0	97	97	99	97
10.1371/journal.pone.0086003	0	0	NULL	0	0	0	0	0	0	0	0	0	NULL	2	1	1	NULL
10.1371/journal.pone.0086018	0	0	0	0	1	1	1	0	0	0	0	0	0	14	17	18	17
10.1371/journal.pone.0086027	0	0	NULL	0	0	0	0	0	0	0	0	0	NULL	5	4	4	NULL
10.1371/journal.pone.0086033	0	0	NULL	0	0	0	0	0	0	0	0	0	NULL	56	63	66	NULL
10.1371/journal.pone.0086050	0	0	0	0	5	5	4	0	0	0	0	0	0	25	24	27	24
10.1371/journal.pone.0086068	0	0	6	0	3	3	3	0	0	0	0	0	0	14	16	17	16
10.1371/journal.pone.0086069	0	0	NULL	0	0	0	0	0	0	0	0	0	NULL	13	12	13	NULL
10.1371/journal.pone.0086070	0	0	0	0	0	3	3	0	0	0	0	0	0	17	17	20	18
10.1371/journal.pone.0086073	0	0	0	0	0	2	2	0	0	0	0	0	0	19	23	23	23
10.1371/journal.pone.0086074	0	0	NULL	0	0	0	0	0	0	0	0	0	NULL	12	11	12	NULL
10.1371/journal.pone.0086080	0	0	0	0	4	6	5	0	0	0	0	0	0	20	20	20	20
10.1371/journal.pone.0086083	0	0	NULL	0	0	0	0	0	0	0	0	0	NULL	10	9	9	NULL
10.1371/journal.pone.0086085	0	0	0	0	1	1	1	0	0	0	0	0	0	25	23	24	23
10.1371/journal.pone.0086088	0	0	0	0	1	3	3	0	0	0	0	0	0	11	11	11	11
10.1371/journal.pone.0086089	0	0	NULL	0	0	0	0	0	0	0	0	0	NULL	4	3	3	NULL
10.1371/journal.pone.0086093	4	2	0	0	11	14	12	0	0	0	0	0	0	42	40	40	40
10.1371/journal.pone.0086097	0	0	NULL	0	0	0	0	0	0	0	0	0	NULL	28	29	31	NULL
10.1371/journal.pone.0086114	4	2	0	4	3	10	7	2	1	0	0	0	0	29	29	33	29
10.1371/journal.pone.0086122	0	0	0	0	0	6	4	0	0	0	0	0	0	7	NULL	0	1
10.1371/journal.pone.0086128	2	0	NULL	0	0	0	0	0	0	0	0	0	NULL	5	5	5	NULL
10.1371/journal.pone.0086139	0	0	NULL	0	0	0	0	0	0	1	1	0	NULL	18	19	19	NULL
10.1371/journal.pone.0086146	0	0	NULL	0	0	0	0	0	0	0	0	0	NULL	10	10	11	NULL
10.1371/journal.pone.0086147	0	0	2	1	0	4	4	0	0	0	1	1	0	61	63	63	63
10.1371/journal.pone.0086156	0	0	0	1	0	1	1	0	0	0	0	0	0	14	14	14	14
10.1371/journal.pone.0086164	0	0	NULL	0	0	0	0	0	0	0	0	0	NULL	9	9	11	NULL
10.1371/journal.pone.0086172	0	0	NULL	0	0	0	0	0	0	0	0	0	NULL	20	21	24	NULL
10.1371/journal.pone.0086188	0	0	0	1	0	1	1	0	0	0	0	0	0	14	14	16	14
10.1371/journal.pone.0084941	0	0	0	0	0	2	2	0	0	0	0	0	0	91	95	101	95
10.1371/journal.pone.0084946	0	0	0	0	2	3	3	0	0	0	0	0	0	23	26	27	26
10.1371/journal.pone.0084953	0	0	0	0	1	1	1	0	0	0	0	0	0	19	18	18	18
10.1371/journal.pone.0084957	0	0	NULL	0	0	0	0	0	0	0	0	0	NULL	12	10	11	NULL
10.1371/journal.pone.0084965	0	0	0	0	2	5	4	0	0	0	0	0	0	30	28	28	28
10.1371/journal.pone.0084977	0	0	3	0	28	15	14	0	0	0	0	0	0	44	47	54	47
10.1371/journal.pone.0084982	0	0	NULL	0	0	0	0	0	0	0	0	0	NULL	19	21	19	NULL
10.1371/journal.pone.0084988	0	0	NULL	0	0	0	0	0	0	0	0	0	NULL	58	56	59	NULL
10.1371/journal.pone.0084997	0	0	0	3	6	20	16	0	0	0	0	0	0	29	31	34	31
10.1371/journal.pone.0084999	0	0	0	1	0	2	2	0	0	0	0	0	0	17	16	16	16
10.1371/journal.pone.0085014	0	0	0	1	1	2	2	0	0	0	0	0	0	34	34	35	34
10.1371/journal.pone.0085016	0	0	0	0	3	3	2	0	0	0	0	0	0	42	44	45	44
10.1371/journal.pone.0085019	0	0	0	0	1	1	1	0	0	0	0	0	0	21	22	22	22
10.1371/journal.pone.0085040	0	0	0	1	1	2	2	0	0	0	0	0	0	34	33	33	33
10.1371/journal.pone.0085058	0	0	NULL	0	0	0	0	0	0	0	0	0	NULL	6	6	6	NULL
10.1371/journal.pone.0085061	16	0	0	3	3	5	5	0	0	0	0	0	0	33	33	33	33
10.1371/journal.pone.0085083	0	0	0	0	0	1	1	0	0	0	0	0	0	8	8	8	8
10.1371/journal.pone.0085094	0	0	NULL	0	0	0	0	0	0	0	0	0	NULL	13	12	12	NULL
10.1371/journal.pone.0085096	0	0	1	0	0	3	3	0	0	0	0	0	0	38	35	36	35
10.1371/journal.pone.0085099	0	0	0	0	0	1	1	0	0	0	0	0	0	6	6	6	6
10.1371/journal.pone.0085113	0	0	0	0	0	0	0	0	0	0	0	0	0	10	10	10	10
10.1371/journal.pone.0085116	0	0	NULL	0	0	0	0	0	0	0	0	0	NULL	7	8	8	NULL
10.1371/journal.pone.0087045	0	0	1	0	1	3	3	0	0	0	0	0	0	28	31	31	31
10.1371/journal.pone.0087051	0	0	0	0	4	4	4	0	0	0	0	0	0	19	18	18	18
10.1371/journal.pone.0087053	0	0	0	0	0	2	2	0	0	0	0	0	0	16	16	17	16
10.1371/journal.pone.0087057	0	0	NULL	0	0	0	0	0	0	0	0	0	NULL	9	11	11	NULL
10.1371/journal.pone.0087062	0	0	0	1	2	3	3	0	0	0	0	0	0	42	43	44	43
10.1371/journal.pone.0087074	0	0	NULL	0	0	0	0	0	0	0	0	0	NULL	79	82	86	NULL
10.1371/journal.pone.0087076	0	0	0	0	1	1	1	0	0	0	0	0	0	22	21	25	21
10.1371/journal.pone.0087092	0	0	0	0	0	5	3	0	0	0	0	0	0	19	20	20	20
10.1371/journal.pone.0087097	0	0	0	0	2	2	1	0	0	0	0	0	0	13	13	13	13
10.1371/journal.pone.0087099	0	0	NULL	0	0	0	0	0	0	0	0	0	NULL	79	70	72	NULL
10.1371/journal.pone.0087106	1	0	0	0	0	1	1	0	0	0	0	0	0	9	9	8	9
10.1371/journal.pone.0087117	0	0	1	0	5	9	7	0	0	0	0	0	0	45	45	46	45
10.1371/journal.pone.0087123	0	0	NULL	0	0	0	0	0	0	0	0	0	NULL	16	16	18	NULL
10.1371/journal.pone.0087139	6	0	0	11	6	15	13	0	0	0	0	0	0	34	38	38	38
10.1371/journal.pone.0087151	3	0	0	0	3	3	3	0	0	0	0	0	0	52	50	53	50
10.1371/journal.pone.0087161	0	0	NULL	0	0	0	0	0	0	0	0	0	NULL	51	52	53	NULL
10.1371/journal.pone.0087164	4	0	0	3	8	17	16	0	0	1	1	13	1	37	40	42	40
10.1371/journal.pone.0087167	0	0	NULL	0	0	0	0	0	0	0	0	0	NULL	8	9	9	NULL
10.1371/journal.pone.0087168	0	0	NULL	0	0	0	0	0	0	0	0	0	NULL	26	17	17	NULL
10.1371/journal.pone.0087174	0	0	NULL	0	0	0	0	0	0	0	0	0	NULL	5	5	5	NULL
10.1371/journal.pone.0087182	0	0	NULL	0	0	0	0	0	0	0	0	0	NULL	6	9	9	NULL
10.1371/journal.pone.0087212	0	0	NULL	0	0	0	0	0	0	0	0	0	NULL	10	11	12	NULL
10.1371/journal.pone.0087240	0	0	0	0	0	1	1	0	0	0	0	0	0	15	17	17	17
10.1371/journal.pone.0087243	0	0	0	0	0	1	1	0	0	0	0	0	0	19	19	19	19
10.1371/journal.pone.0087251	0	0	0	0	0	1	1	0	0	0	0	0	0	46	47	48	47
10.1371/journal.pone.0087256	0	0	0	0	0	1	1	0	0	0	0	0	0	20	20	20	20
10.1371/journal.pone.0087263	0	0	NULL	0	0	0	0	0	0	0	0	0	NULL	19	17	18	NULL
10.1371/journal.pone.0087280	0	0	NULL	0	0	0	0	0	0	0	0	0	NULL	16	16	16	NULL
10.1371/journal.pone.0087290	0	0	0	0	2	2	2	0	0	0	0	0	0	26	27	28	27
10.1371/journal.pone.0087297	0	0	0	0	2	2	2	0	0	0	0	0	0	19	17	17	17
10.1371/journal.pone.0087300	0	0	2	1	6	5	5	0	0	0	0	0	0	21	22	22	22
10.1371/journal.pone.0087305	10	0	0	1	29	25	25	0	0	0	0	0	0	18	18	19	18
10.1371/journal.pone.0087312	0	0	1	0	0	0	0	0	0	0	0	0	0	19	21	21	21
10.1371/journal.pone.0087324	0	0	NULL	0	0	0	0	0	0	0	0	0	NULL	7	7	7	NULL
10.1371/journal.pone.0087330	0	0	NULL	0	0	0	0	0	0	0	0	0	NULL	22	22	22	NULL
10.1371/journal.pone.0087331	0	0	NULL	0	0	0	0	0	0	0	0	0	NULL	17	18	18	NULL
10.1371/journal.pone.0087334	1	0	0	1	0	2	2	0	0	0	0	0	0	19	20	21	20
10.1371/journal.pone.0087357	0	0	0	0	1	4	4	0	0	0	0	0	0	29	31	29	31
10.1371/journal.pone.0087393	0	0	NULL	0	0	0	0	0	0	0	0	0	NULL	20	18	18	NULL
10.1371/journal.pone.0087398	0	0	1	1	1	5	5	0	0	0	0	0	0	30	27	29	27
10.1371/journal.pone.0087404	0	0	0	1	2	2	2	0	0	0	0	0	0	22	17	18	17
10.1371/journal.pone.0087407	0	0	NULL	0	0	0	0	0	0	0	1	0	NULL	12	12	13	NULL
10.1371/journal.pone.0087414	0	0	0	0	0	0	0	0	0	0	0	0	0	15	15	17	15
10.1371/journal.pone.0087422	0	0	6	37	21	37	34	0	0	0	0	0	0	132	134	140	134
10.1371/journal.pone.0087751	0	0	0	0	0	1	1	0	0	0	0	0	0	11	11	12	11
10.1371/journal.pone.0087752	0	0	0	0	2	2	2	0	0	0	0	0	0	28	27	29	27
10.1371/journal.pone.0087758	0	0	0	0	1	1	1	0	0	0	0	0	0	15	14	14	14
10.1371/journal.pone.0087786	0	0	NULL	0	0	0	0	0	0	0	0	0	NULL	15	9	10	NULL
10.1371/journal.pone.0087787	0	0	NULL	0	0	0	0	0	0	0	0	0	NULL	12	13	14	NULL
10.1371/journal.pone.0087789	2	0	0	0	0	1	1	0	0	0	0	0	0	41	44	45	43
10.1371/journal.pone.0087794	0	0	0	0	0	2	2	0	0	0	0	0	0	9	9	10	9
10.1371/journal.pone.0087823	6	3	2	0	19	20	18	0	0	0	0	0	0	22	21	21	21
10.1371/journal.pone.0087828	0	0	NULL	0	0	0	0	0	0	0	0	0	NULL	12	13	15	NULL
10.1371/journal.pone.0087832	0	0	NULL	0	0	0	0	0	0	0	0	0	NULL	21	22	22	NULL
10.1371/journal.pone.0087844	0	0	NULL	0	0	0	0	0	0	0	0	0	NULL	22	21	22	NULL
10.1371/journal.pone.0087861	0	0	NULL	0	0	0	0	0	0	0	0	0	NULL	15	13	13	NULL
10.1371/journal.pone.0087870	0	0	0	1	0	2	2	0	0	0	0	0	0	32	32	34	32
10.1371/journal.pone.0087872	2	0	4	14	17	60	40	0	0	0	0	0	0	83	85	88	85
10.1371/journal.pone.0087874	0	0	NULL	0	0	0	0	0	0	0	0	0	NULL	22	24	23	NULL
10.1371/journal.pone.0087877	0	0	0	0	2	4	4	0	0	0	0	0	0	37	38	38	38
10.1371/journal.pone.0087882	1	1	NULL	0	0	0	0	0	0	0	0	0	NULL	56	57	58	NULL
10.1371/journal.pone.0087888	0	0	0	0	0	1	1	0	0	0	0	0	0	41	41	43	41
10.1371/journal.pone.0087897	0	0	0	0	2	2	2	0	0	0	0	0	0	19	18	19	18
10.1371/journal.pone.0087899	0	0	NULL	0	0	0	0	0	0	0	0	0	NULL	46	39	41	NULL
10.1371/journal.pone.0087909	0	0	NULL	0	0	0	0	0	0	0	0	0	NULL	15	15	16	NULL
10.1371/journal.pone.0087949	0	0	0	2	5	3	3	0	0	0	0	0	0	14	18	19	18
10.1371/journal.pone.0087952	2	0	0	2	3	4	4	0	0	0	0	0	0	18	20	22	20
10.1371/journal.pone.0087956	0	0	0	0	0	2	2	0	0	0	0	0	0	26	24	25	24
10.1371/journal.pone.0087958	0	0	0	0	0	0	0	0	0	0	0	0	0	31	32	32	32
10.1371/journal.pone.0087961	30	8	1	21	30	54	44	0	0	0	0	0	0	62	68	70	68
10.1371/journal.pone.0087984	0	0	0	0	1	1	1	0	0	0	0	0	0	7	8	8	8
10.1371/journal.pone.0088003	0	0	0	0	0	1	1	0	0	0	0	0	0	21	22	21	22
10.1371/journal.pone.0088007	0	0	0	0	0	1	1	0	0	0	0	0	0	19	19	21	19
10.1371/journal.pone.0088036	0	0	0	0	0	1	1	0	0	0	0	0	0	23	24	26	24
10.1371/journal.pone.0088037	0	0	NULL	0	0	0	0	0	0	0	0	0	NULL	5	4	4	NULL
10.1371/journal.pone.0088039	0	0	0	0	1	1	1	0	0	0	0	0	0	9	8	8	7
10.1371/journal.pone.0088057	0	0	0	0	1	2	2	0	0	0	0	0	0	16	15	16	15
10.1371/journal.pone.0088059	0	0	NULL	0	0	0	0	0	0	0	0	0	NULL	17	17	18	NULL
10.1371/journal.pone.0088072	0	0	0	0	1	3	3	0	0	0	0	0	0	15	16	15	16
10.1371/journal.pone.0088080	0	0	NULL	0	0	0	0	0	0	0	0	0	NULL	17	23	18	NULL
10.1371/journal.pone.0088088	0	0	NULL	0	0	0	0	0	0	0	0	0	NULL	20	21	23	NULL
10.1371/journal.pone.0088107	0	0	NULL	0	0	0	0	0	0	0	0	0	NULL	14	11	11	NULL
10.1371/journal.pone.0088109	0	0	NULL	0	0	0	0	0	0	0	0	0	NULL	6	7	7	NULL
10.1371/journal.pone.0088122	0	0	NULL	0	0	0	0	0	0	0	0	0	NULL	11	12	14	NULL
10.1371/journal.pone.0088129	0	0	0	1	0	1	1	0	0	0	0	0	0	36	44	47	44
10.1371/journal.pone.0088131	0	0	0	2	0	5	2	0	0	0	0	0	0	17	19	22	19
10.1371/journal.pone.0088148	0	0	NULL	0	0	0	0	0	0	0	0	0	NULL	4	3	3	NULL
10.1371/journal.pone.0088154	0	0	NULL	0	0	0	0	0	0	0	0	0	NULL	33	32	33	NULL
10.1371/journal.pone.0088185	0	0	NULL	0	0	0	0	0	0	0	0	0	NULL	7	8	9	NULL
10.1371/journal.pone.0088222	0	0	0	1	3	6	6	0	0	0	0	0	0	67	70	70	70
10.1371/journal.pone.0088231	0	0	NULL	0	0	0	0	0	0	0	0	0	NULL	14	14	17	NULL
10.1371/journal.pone.0088236	0	0	NULL	0	0	0	0	0	0	0	0	0	NULL	5	5	5	NULL
10.1371/journal.pone.0088243	0	0	NULL	0	0	0	0	0	0	0	0	0	NULL	8	10	11	NULL
10.1371/journal.pone.0088247	0	0	0	0	2	4	4	0	0	0	0	0	0	49	47	50	47
10.1371/journal.pone.0088265	0	0	0	0	5	5	5	0	0	0	0	0	0	22	24	25	24
10.1371/journal.pone.0088271	0	0	1	0	2	2	2	0	0	0	0	0	0	30	29	31	29
10.1371/journal.pone.0088282	0	0	NULL	0	0	0	0	0	0	0	0	0	NULL	14	13	14	NULL
10.1371/journal.pone.0088295	8	3	3	1	0	3	3	0	0	0	0	0	0	16	16	16	16
10.1371/journal.pone.0088315	0	0	NULL	0	0	0	0	0	0	0	0	0	NULL	25	26	27	NULL
10.1371/journal.pone.0088322	0	0	0	1	0	1	1	0	0	0	0	0	0	4	4	4	4
10.1371/journal.pone.0088323	2	2	0	0	0	4	2	0	0	0	0	0	0	32	31	34	31
10.1371/journal.pone.0088325	0	0	NULL	0	0	0	0	0	0	0	0	0	NULL	7	7	7	NULL
[truncated: 29,438 more rows]
